# Supplementary material for: Structure of Mycobacterium tuberculosis cytochrome bcc in complex with Q203 and TB47, two anti-TB drug candidates
Source: eLife. 2021 Nov 25;10:e69418. doi: 10.7554/eLife.69418 (PMC8616580; doi:10.7554/eLife.69418)
Supplement: Figure 2—figure supplement 1—source data 1. [file elife-69418-fig2-figsupp1-data1.csv]

Chrom.1		Chrom.1
Fraction		UV
ml	Fraction	ml	mAU
8.470263	2	0	3.399354
8.770176	3	0.001	3.382251
9.070279	4	0.001	3.374012
9.370461	5	0.002	3.368319
9.670232	6	0.002	3.363656
9.97079	7	0.003	3.359198
10.2704	8	0.004	3.356299
10.57046	9	0.004	3.353785
10.87053	10	0.005	3.351716
11.17064	11	0.005	3.350871
11.47115	12	0.006	3.349526
11.77085	13	0.007	3.347872
12.07133	14	0.007	3.345917
12.37114	15	0.008	3.343557
12.67121	16	0.008	3.342526
12.97129	17	0.009	3.341952
13.27147	18	0.01	3.340675
13.57168	19	0.01	3.339553
13.87147	20	0.011	3.33843
14.17161	21	0.011	3.336083
14.47204	22	0.012	3.333681
14.77162	23	0.013	3.331699
15.07183	24	0.013	3.331077
15.37184	25	0.014	3.330508
15.67199	26	0.014	3.330341
15.97197	27	0.015	3.330634
16.27247	28	0.015	3.329262
16.57229	29	0.016	3.328101
16.87239	30	0.017	3.327057
17.10143	Waste	0.017	3.325974
22.17717	32	0.018	3.325217
22.47694	33	0.018	3.324682
22.4887	Waste	0.019	3.324357
23.7385	35	0.02	3.323882
24.03843	36	0.02	3.324011
24.2527	Waste	0.021	3.3241
		0.021	3.322215
		0.022	3.320756
		0.023	3.319536
		0.023	3.318519
		0.024	3.317553
		0.024	3.317075
		0.025	3.317023
		0.026	3.317213
		0.026	3.316134
		0.027	3.314423
		0.027	3.312319
		0.028	3.308876
		0.028	3.30465
		0.029	3.299683
		0.03	3.293804
		0.03	3.287122
		0.031	3.279426
		0.031	3.270172
		0.032	3.260635
		0.033	3.251478
		0.033	3.242674
		0.034	3.233309
		0.034	3.225039
		0.035	3.217029
		0.036	3.208421
		0.036	3.202264
		0.037	3.197094
		0.037	3.192551
		0.038	3.186587
		0.038	3.180955
		0.039	3.175831
		0.04	3.171632
		0.04	3.166302
		0.041	3.161058
		0.041	3.156412
		0.042	3.153014
		0.043	3.149238
		0.043	3.144064
		0.044	3.138479
		0.044	3.131543
		0.045	3.122517
		0.046	3.113719
		0.046	3.107297
		0.047	3.101184
		0.047	3.096032
		0.048	3.092847
		0.049	3.093029
		0.049	3.096255
		0.05	3.100764
		0.05	3.105013
		0.051	3.107092
		0.051	3.109146
		0.052	3.108413
		0.053	3.10545
		0.053	3.101146
		0.054	3.095461
		0.054	3.090487
		0.055	3.086427
		0.056	3.079705
		0.056	3.073879
		0.057	3.068643
		0.057	3.061827
		0.058	3.055705
		0.059	3.052299
		0.059	3.048532
		0.06	3.041047
		0.06	3.035376
		0.061	3.03074
		0.062	3.025684
		0.062	3.020972
		0.063	3.014942
		0.063	3.009334
		0.064	3.002556
		0.064	2.995105
		0.065	2.988192
		0.066	2.981052
		0.066	2.973034
		0.067	2.965144
		0.067	2.957264
		0.068	2.950053
		0.069	2.943923
		0.069	2.936802
		0.07	2.928597
		0.07	2.92181
		0.071	2.912197
		0.072	2.904977
		0.072	2.898288
		0.073	2.891728
		0.073	2.883003
		0.074	2.87432
		0.074	2.870087
		0.075	2.864301
		0.076	2.857253
		0.076	2.851324
		0.077	2.847779
		0.077	2.84241
		0.078	2.835086
		0.079	2.830681
		0.079	2.826846
		0.08	2.822096
		0.08	2.818619
		0.081	2.816787
		0.082	2.813067
		0.082	2.81175
		0.083	2.808143
		0.083	2.806413
		0.084	2.804981
		0.085	2.803484
		0.085	2.799697
		0.086	2.801651
		0.086	2.796715
		0.087	2.793182
		0.087	2.789459
		0.088	2.789675
		0.089	2.788154
		0.089	2.785777
		0.09	2.783854
		0.09	2.782393
		0.091	2.778624
		0.092	2.774409
		0.092	2.769031
		0.093	2.767453
		0.093	2.764879
		0.094	2.760621
		0.095	2.758008
		0.095	2.755169
		0.096	2.752854
		0.096	2.750912
		0.097	2.745876
		0.098	2.743919
		0.098	2.739156
		0.099	2.736884
		0.099	2.73462
		0.1	2.732478
		0.1	2.72887
		0.101	2.726955
		0.102	2.726205
		0.102	2.724117
		0.103	2.720086
		0.103	2.714921
		0.104	2.709447
		0.105	2.705239
		0.105	2.701803
		0.106	2.69839
		0.106	2.694577
		0.107	2.692475
		0.108	2.689874
		0.108	2.687081
		0.109	2.683983
		0.109	2.680427
		0.11	2.677058
		0.11	2.673281
		0.111	2.669172
		0.112	2.665838
		0.112	2.663731
		0.113	2.659445
		0.113	2.654362
		0.114	2.650862
		0.115	2.647124
		0.115	2.644043
		0.116	2.640589
		0.116	2.637283
		0.117	2.634152
		0.118	2.630717
		0.118	2.63002
		0.119	2.627767
		0.119	2.623706
		0.12	2.621962
		0.121	2.619948
		0.121	2.61679
		0.122	2.614287
		0.122	2.611004
		0.123	2.607592
		0.123	2.606705
		0.124	2.605071
		0.125	2.601996
		0.125	2.599761
		0.126	2.598059
		0.126	2.597684
		0.127	2.595438
		0.128	2.593899
		0.128	2.594159
		0.129	2.588139
		0.129	2.583988
		0.13	2.581764
		0.131	2.577893
		0.131	2.576639
		0.132	2.574054
		0.132	2.572386
		0.133	2.568609
		0.134	2.566377
		0.134	2.565207
		0.135	2.560978
		0.135	2.556737
		0.136	2.556459
		0.136	2.554097
		0.137	2.552781
		0.138	2.550414
		0.138	2.547719
		0.139	2.54601
		0.139	2.542281
		0.14	2.537947
		0.141	2.534648
		0.141	2.53236
		0.142	2.528935
		0.142	2.525333
		0.143	2.522507
		0.144	2.5235
		0.144	2.522831
		0.145	2.521076
		0.145	2.519675
		0.146	2.517198
		0.146	2.51423
		0.147	2.512748
		0.148	2.51169
		0.148	2.509587
		0.149	2.507224
		0.149	2.506306
		0.15	2.504973
		0.151	2.502958
		0.151	2.502075
		0.152	2.501155
		0.152	2.500627
		0.153	2.498134
		0.154	2.495066
		0.154	2.493171
		0.155	2.490239
		0.155	2.487941
		0.156	2.484163
		0.157	2.48138
		0.157	2.478929
		0.158	2.477679
		0.158	2.474545
		0.159	2.469142
		0.159	2.463588
		0.16	2.461893
		0.161	2.460922
		0.161	2.458465
		0.162	2.454888
		0.162	2.450622
		0.163	2.447696
		0.164	2.445573
		0.164	2.4431
		0.165	2.440822
		0.165	2.438643
		0.166	2.43572
		0.167	2.432102
		0.167	2.430146
		0.168	2.429511
		0.168	2.428639
		0.169	2.429212
		0.17	2.428318
		0.17	2.427935
		0.171	2.42713
		0.171	2.426224
		0.172	2.42483
		0.172	2.422752
		0.173	2.422014
		0.174	2.423069
		0.174	2.423608
		0.175	2.420733
		0.175	2.418699
		0.176	2.417599
		0.177	2.415965
		0.177	2.415345
		0.178	2.41592
		0.178	2.414869
		0.179	2.411613
		0.18	2.40997
		0.18	2.408473
		0.181	2.405972
		0.181	2.405612
		0.182	2.403914
		0.182	2.401779
		0.183	2.399159
		0.184	2.396546
		0.184	2.392793
		0.185	2.390195
		0.185	2.388124
		0.186	2.385239
		0.187	2.382965
		0.187	2.380136
		0.188	2.377727
		0.188	2.376185
		0.189	2.375204
		0.19	2.373863
		0.19	2.371429
		0.191	2.369959
		0.191	2.369516
		0.192	2.370034
		0.193	2.367497
		0.193	2.366333
		0.194	2.366815
		0.194	2.365846
		0.195	2.363591
		0.195	2.362711
		0.196	2.361436
		0.197	2.35889
		0.197	2.354879
		0.198	2.35283
		0.198	2.351742
		0.199	2.351683
		0.2	2.350034
		0.2	2.348156
		0.201	2.346338
		0.201	2.345334
		0.202	2.343694
		0.203	2.343226
		0.203	2.340849
		0.204	2.340464
		0.204	2.338063
		0.205	2.336215
		0.206	2.334397
		0.206	2.333141
		0.207	2.330742
		0.207	2.328423
		0.208	2.328667
		0.208	2.329411
		0.209	2.327774
		0.21	2.325901
		0.21	2.323907
		0.211	2.321949
		0.211	2.322456
		0.212	2.325921
		0.213	2.328684
		0.213	2.332871
		0.214	2.336498
		0.214	2.338866
		0.215	2.341042
		0.216	2.345002
		0.216	2.349231
		0.217	2.353108
		0.217	2.356587
		0.218	2.359145
		0.218	2.36207
		0.219	2.364996
		0.22	2.367541
		0.22	2.371097
		0.221	2.373652
		0.221	2.377515
		0.222	2.38119
		0.223	2.38224
		0.223	2.383815
		0.224	2.387045
		0.224	2.391048
		0.225	2.39356
		0.226	2.395706
		0.226	2.398818
		0.227	2.397352
		0.227	2.397418
		0.228	2.396237
		0.229	2.395799
		0.229	2.396664
		0.23	2.399249
		0.23	2.399052
		0.231	2.397206
		0.231	2.398494
		0.232	2.398795
		0.233	2.403556
		0.233	2.405914
		0.234	2.40914
		0.234	2.413928
		0.235	2.416848
		0.236	2.422358
		0.236	2.429561
		0.237	2.434065
		0.237	2.440203
		0.238	2.447786
		0.239	2.454415
		0.239	2.463104
		0.24	2.474576
		0.24	2.486552
		0.241	2.494915
		0.242	2.505938
		0.242	2.517563
		0.243	2.527367
		0.243	2.539762
		0.244	2.549465
		0.244	2.558708
		0.245	2.570937
		0.246	2.58337
		0.246	2.595183
		0.247	2.607193
		0.247	2.618003
		0.248	2.630374
		0.249	2.641084
		0.249	2.653574
		0.25	2.665497
		0.25	2.67296
		0.251	2.680626
		0.252	2.689115
		0.252	2.699058
		0.253	2.706259
		0.253	2.712139
		0.254	2.716969
		0.254	2.721
		0.255	2.724981
		0.256	2.73168
		0.256	2.736522
		0.257	2.74084
		0.257	2.746228
		0.258	2.748981
		0.259	2.75415
		0.259	2.76131
		0.26	2.765388
		0.26	2.767439
		0.261	2.768468
		0.262	2.769141
		0.262	2.766965
		0.263	2.765557
		0.263	2.765497
		0.264	2.763712
		0.265	2.762086
		0.265	2.761839
		0.266	2.760527
		0.266	2.757865
		0.267	2.754838
		0.267	2.75393
		0.268	2.754633
		0.269	2.754349
		0.269	2.752842
		0.27	2.750787
		0.27	2.748941
		0.271	2.747411
		0.272	2.744587
		0.272	2.741727
		0.273	2.736681
		0.273	2.730932
		0.274	2.725693
		0.275	2.722063
		0.275	2.717849
		0.276	2.711875
		0.276	2.710445
		0.277	2.70937
		0.277	2.70701
		0.278	2.703816
		0.279	2.700691
		0.279	2.697325
		0.28	2.69387
		0.28	2.691693
		0.281	2.689367
		0.282	2.686112
		0.282	2.682737
		0.283	2.678792
		0.283	2.675355
		0.284	2.671101
		0.285	2.665688
		0.285	2.661048
		0.286	2.657113
		0.286	2.654133
		0.287	2.651098
		0.288	2.650993
		0.288	2.647039
		0.289	2.644156
		0.289	2.64275
		0.29	2.641294
		0.29	2.640534
		0.291	2.635235
		0.292	2.628697
		0.292	2.625297
		0.293	2.623439
		0.293	2.620087
		0.294	2.616617
		0.295	2.613966
		0.295	2.61073
		0.296	2.606946
		0.296	2.603793
		0.297	2.602033
		0.298	2.599213
		0.298	2.596483
		0.299	2.594425
		0.299	2.593341
		0.3	2.590705
		0.301	2.587052
		0.301	2.581948
		0.302	2.578429
		0.302	2.575942
		0.303	2.57503
		0.303	2.5748
		0.304	2.572923
		0.305	2.570273
		0.305	2.56871
		0.306	2.568215
		0.306	2.569017
		0.307	2.56512
		0.308	2.561014
		0.308	2.559797
		0.309	2.556662
		0.309	2.553494
		0.31	2.552942
		0.311	2.551379
		0.311	2.548471
		0.312	2.545349
		0.312	2.543441
		0.313	2.54136
		0.313	2.539375
		0.314	2.53758
		0.315	2.535108
		0.315	2.533288
		0.316	2.531315
		0.316	2.528608
		0.317	2.526909
		0.318	2.523014
		0.318	2.516983
		0.319	2.511443
		0.319	2.507525
		0.32	2.504657
		0.321	2.501254
		0.321	2.499026
		0.322	2.496855
		0.322	2.493233
		0.323	2.490729
		0.324	2.488404
		0.324	2.485091
		0.325	2.482334
		0.325	2.481091
		0.326	2.479336
		0.326	2.476091
		0.327	2.472479
		0.328	2.46987
		0.328	2.467673
		0.329	2.465246
		0.329	2.464325
		0.33	2.462651
		0.331	2.460954
		0.331	2.459182
		0.332	2.455764
		0.332	2.453911
		0.333	2.453462
		0.334	2.452079
		0.334	2.451645
		0.335	2.449292
		0.335	2.447518
		0.336	2.445229
		0.337	2.442285
		0.337	2.441725
		0.338	2.439994
		0.338	2.437632
		0.339	2.437561
		0.339	2.434666
		0.34	2.433114
		0.341	2.429328
		0.341	2.426512
		0.342	2.42407
		0.342	2.423216
		0.343	2.419715
		0.344	2.416462
		0.344	2.415016
		0.345	2.411532
		0.345	2.409935
		0.346	2.407048
		0.347	2.406193
		0.347	2.403251
		0.348	2.401147
		0.348	2.401199
		0.349	2.400398
		0.349	2.399193
		0.35	2.398148
		0.351	2.39646
		0.351	2.394367
		0.352	2.392509
		0.352	2.391674
		0.353	2.391473
		0.354	2.389472
		0.354	2.387105
		0.355	2.384838
		0.355	2.383856
		0.356	2.382565
		0.357	2.381083
		0.357	2.379805
		0.358	2.378715
		0.358	2.376811
		0.359	2.375154
		0.36	2.373817
		0.36	2.370996
		0.361	2.369763
		0.361	2.367508
		0.362	2.366064
		0.362	2.361336
		0.363	2.357448
		0.364	2.354549
		0.364	2.351969
		0.365	2.350068
		0.365	2.349445
		0.366	2.349049
		0.367	2.345803
		0.367	2.341252
		0.368	2.338125
		0.368	2.33551
		0.369	2.334033
		0.37	2.3323
		0.37	2.33115
		0.371	2.329768
		0.371	2.328003
		0.372	2.325877
		0.373	2.325579
		0.373	2.324853
		0.374	2.322781
		0.374	2.322968
		0.375	2.320773
		0.375	2.318805
		0.376	2.317188
		0.377	2.320334
		0.377	2.320775
		0.378	2.321359
		0.378	2.318674
		0.379	2.316594
		0.38	2.314831
		0.38	2.312381
		0.381	2.313527
		0.381	2.313207
		0.382	2.311851
		0.383	2.310898
		0.383	2.309152
		0.384	2.30499
		0.384	2.305004
		0.385	2.303432
		0.385	2.302721
		0.386	2.300322
		0.387	2.298823
		0.387	2.297209
		0.388	2.295935
		0.388	2.2943
		0.389	2.293219
		0.39	2.292978
		0.39	2.292096
		0.391	2.290285
		0.391	2.287692
		0.392	2.286484
		0.393	2.283833
		0.393	2.287268
		0.394	2.288519
		0.394	2.28841
		0.395	2.287846
		0.396	2.284928
		0.396	2.286167
		0.397	2.287462
		0.397	2.286995
		0.398	2.28919
		0.398	2.290713
		0.399	2.289123
		0.4	2.287261
		0.4	2.286669
		0.401	2.287853
		0.401	2.288609
		0.402	2.288876
		0.403	2.28994
		0.403	2.290865
		0.404	2.290051
		0.404	2.290606
		0.405	2.290779
		0.406	2.290457
		0.406	2.290071
		0.407	2.290828
		0.407	2.291499
		0.408	2.28964
		0.409	2.288241
		0.409	2.287325
		0.41	2.288184
		0.41	2.289684
		0.411	2.2889
		0.411	2.288621
		0.412	2.288648
		0.413	2.288306
		0.413	2.290043
		0.414	2.292078
		0.414	2.292137
		0.415	2.291607
		0.416	2.290705
		0.416	2.288879
		0.417	2.28688
		0.417	2.284266
		0.418	2.28274
		0.419	2.281235
		0.419	2.279695
		0.42	2.2792
		0.42	2.278492
		0.421	2.277754
		0.421	2.27649
		0.422	2.273709
		0.423	2.271029
		0.423	2.269385
		0.424	2.267521
		0.424	2.26369
		0.425	2.262025
		0.426	2.261438
		0.426	2.259812
		0.427	2.258545
		0.427	2.256514
		0.428	2.252442
		0.429	2.251746
		0.429	2.251283
		0.43	2.249511
		0.43	2.249583
		0.431	2.249797
		0.432	2.248378
		0.432	2.247566
		0.433	2.247539
		0.433	2.246033
		0.434	2.244987
		0.434	2.241713
		0.435	2.240974
		0.436	2.237568
		0.436	2.236593
		0.437	2.238317
		0.437	2.238034
		0.438	2.238735
		0.439	2.239515
		0.439	2.2397
		0.44	2.238819
		0.44	2.238385
		0.441	2.236402
		0.442	2.23493
		0.442	2.235038
		0.443	2.234054
		0.443	2.23447
		0.444	2.234676
		0.445	2.234706
		0.445	2.233469
		0.446	2.232941
		0.446	2.234803
		0.447	2.237164
		0.447	2.238892
		0.448	2.239666
		0.449	2.239435
		0.449	2.240929
		0.45	2.240613
		0.45	2.242629
		0.451	2.244169
		0.452	2.244693
		0.452	2.244984
		0.453	2.244603
		0.453	2.243615
		0.454	2.243502
		0.455	2.244129
		0.455	2.244295
		0.456	2.247147
		0.456	2.249356
		0.457	2.25048
		0.457	2.251127
		0.458	2.249702
		0.459	2.248188
		0.459	2.249404
		0.46	2.250881
		0.46	2.250519
		0.461	2.2489
		0.462	2.248693
		0.462	2.247113
		0.463	2.247654
		0.463	2.249533
		0.464	2.251414
		0.465	2.252983
		0.465	2.252587
		0.466	2.251097
		0.466	2.250086
		0.467	2.249761
		0.468	2.249381
		0.468	2.250141
		0.469	2.250303
		0.469	2.248949
		0.47	2.248644
		0.47	2.244516
		0.471	2.242445
		0.472	2.239511
		0.472	2.238339
		0.473	2.236442
		0.473	2.237427
		0.474	2.235557
		0.475	2.235269
		0.475	2.236187
		0.476	2.236684
		0.476	2.235621
		0.477	2.236233
		0.478	2.235152
		0.478	2.233279
		0.479	2.231611
		0.479	2.231508
		0.48	2.232187
		0.481	2.231965
		0.481	2.231363
		0.482	2.232142
		0.482	2.231209
		0.483	2.231404
		0.483	2.232754
		0.484	2.233394
		0.485	2.234023
		0.485	2.235315
		0.486	2.237222
		0.486	2.238349
		0.487	2.239528
		0.488	2.239938
		0.488	2.240326
		0.489	2.239709
		0.489	2.238243
		0.49	2.237145
		0.491	2.237041
		0.491	2.236931
		0.492	2.236762
		0.492	2.237265
		0.493	2.236722
		0.493	2.23572
		0.494	2.235242
		0.495	2.233646
		0.495	2.233581
		0.496	2.233838
		0.496	2.233265
		0.497	2.232132
		0.498	2.230814
		0.498	2.229365
		0.499	2.227974
		0.499	2.227989
		0.5	2.226559
		0.501	2.225442
		0.501	2.225001
		0.502	2.223021
		0.502	2.222652
		0.503	2.221435
		0.504	2.219674
		0.504	2.218884
		0.505	2.216189
		0.505	2.214377
		0.506	2.214468
		0.506	2.21414
		0.507	2.213675
		0.508	2.213371
		0.508	2.21269
		0.509	2.212914
		0.509	2.212822
		0.51	2.210767
		0.511	2.209106
		0.511	2.208071
		0.512	2.209294
		0.512	2.208504
		0.513	2.210959
		0.514	2.210633
		0.514	2.210122
		0.515	2.211215
		0.515	2.212231
		0.516	2.212565
		0.517	2.213459
		0.517	2.212859
		0.518	2.213844
		0.518	2.21478
		0.519	2.213659
		0.519	2.214369
		0.52	2.213375
		0.521	2.211003
		0.521	2.209897
		0.522	2.209013
		0.522	2.209426
		0.523	2.20857
		0.524	2.20889
		0.524	2.209092
		0.525	2.209445
		0.525	2.20897
		0.526	2.2085
		0.527	2.208056
		0.527	2.207413
		0.528	2.206498
		0.528	2.207408
		0.529	2.207837
		0.529	2.206842
		0.53	2.206679
		0.531	2.207134
		0.531	2.206692
		0.532	2.206472
		0.532	2.207175
		0.533	2.209186
		0.534	2.210851
		0.534	2.210092
		0.535	2.210294
		0.535	2.21055
		0.536	2.211782
		0.537	2.212166
		0.537	2.210726
		0.538	2.207813
		0.538	2.206138
		0.539	2.204951
		0.54	2.205174
		0.54	2.205025
		0.541	2.205594
		0.541	2.204041
		0.542	2.203059
		0.542	2.201333
		0.543	2.201198
		0.544	2.201124
		0.544	2.201819
		0.545	2.202252
		0.545	2.202291
		0.546	2.202656
		0.547	2.202763
		0.547	2.201801
		0.548	2.200777
		0.548	2.200055
		0.549	2.200872
		0.55	2.201853
		0.55	2.202552
		0.551	2.203346
		0.551	2.204219
		0.552	2.206591
		0.553	2.208333
		0.553	2.209129
		0.554	2.210121
		0.554	2.211757
		0.555	2.211984
		0.555	2.211291
		0.556	2.211915
		0.557	2.213133
		0.557	2.212906
		0.558	2.212024
		0.558	2.210403
		0.559	2.207731
		0.56	2.205514
		0.56	1.005314
		0.561	-0.0001723258
		0.561	-0.001089125
		0.562	-0.001796581
		0.563	-0.002582978
		0.563	-0.004338021
		0.564	-0.006778462
		0.564	-0.007629142
		0.565	-0.009103159
		0.565	-0.01082677
		0.566	-0.01288683
		0.567	-0.01422747
		0.567	-0.01580218
		0.568	-0.01497105
		0.568	-0.01565383
		0.569	-0.01842268
		0.57	-0.01810222
		0.57	-0.01863908
		0.571	-0.01997525
		0.571	-0.02094585
		0.572	-0.01876891
		0.573	-0.01860777
		0.573	-0.01813062
		0.574	-0.01805622
		0.574	-0.01846217
		0.575	-0.01813906
		0.576	-0.01980929
		0.576	-0.0229544
		0.577	-0.02280774
		0.577	-0.0212445
		0.578	-0.02106544
		0.578	-0.0194707
		0.579	-0.02013639
		0.58	-0.02105876
		0.58	-0.02144768
		0.581	-0.02297408
		0.581	-0.02229142
		0.582	-0.0211479
		0.583	-0.02022208
		0.583	-0.02015774
		0.584	-0.01862466
		0.584	-0.02018978
		0.585	-0.02167048
		0.586	-0.0228278
		0.586	-0.02506598
		0.587	-0.02701244
		0.587	-0.02973142
		0.588	-0.03067938
		0.588	-0.03193524
		0.589	-0.03299161
		0.59	-0.03358753
		0.59	-0.03152728
		0.591	-0.02930864
		0.591	-0.03075173
		0.592	-0.0312543
		0.593	-0.03028058
		0.593	-0.03064594
		0.594	-0.03004898
		0.594	-0.02946497
		0.595	-0.02988533
		0.596	-0.03058681
		0.596	-0.03142353
		0.597	-0.03455225
		0.597	-0.03781123
		0.598	-0.03985735
		0.599	-0.04138367
		0.599	-0.04119126
		0.6	-0.0399082
		0.6	-0.0394062
		0.601	-0.03929784
		0.601	-0.03879147
		0.602	-0.03759001
		0.603	-0.0366279
		0.603	-0.03541122
		0.604	-0.03460441
		0.604	-0.03509564
		0.605	-0.03706952
		0.606	-0.0381623
		0.606	-0.03797844
		0.607	-0.03828348
		0.607	-0.03814898
		0.608	-0.03824351
		0.609	-0.03933973
		0.609	-0.04000412
		0.61	-0.03864694
		0.61	-0.03838344
		0.611	-0.0375384
		0.612	-0.03541178
		0.612	-0.03276809
		0.613	-0.03228612
		0.613	-0.0323434
		0.614	-0.03354928
		0.614	-0.03381127
		0.615	-0.03388339
		0.616	-0.03359962
		0.616	-0.03387379
		0.617	-0.03342578
		0.617	-0.03421322
		0.618	-0.03543968
		0.619	-0.03514753
		0.619	-0.03395619
		0.62	-0.03221034
		0.62	-0.03305915
		0.621	-0.03241296
		0.622	-0.03255473
		0.622	-0.03172068
		0.623	-0.03246093
		0.623	-0.03186892
		0.624	-0.03177784
		0.624	-0.03085813
		0.625	-0.03078003
		0.626	-0.0332082
		0.626	-0.0347747
		0.627	-0.03387504
		0.627	-0.03313634
		0.628	-0.03200022
		0.629	-0.03248385
		0.629	-0.0338436
		0.63	-0.0341666
		0.63	-0.03589249
		0.631	-0.0369244
		0.632	-0.03591783
		0.632	-0.03521915
		0.633	-0.0347615
		0.633	-0.03528254
		0.634	-0.03707816
		0.635	-0.03767121
		0.635	-0.03770353
		0.636	-0.03777847
		0.636	-0.03864018
		0.637	-0.04067002
		0.637	-0.04103062
		0.638	-0.04120852
		0.639	-0.04322234
		0.639	-0.04550088
		0.64	-0.0453418
		0.64	-0.0456575
		0.641	-0.04706408
		0.642	-0.04788313
		0.642	-0.04811869
		0.643	-0.04769714
		0.643	-0.04735661
		0.644	-0.04652366
		0.645	-0.04563766
		0.645	-0.04505054
		0.646	-0.04619065
		0.646	-0.04717362
		0.647	-0.04762098
		0.648	-0.04903525
		0.648	-0.04865466
		0.649	-0.04841205
		0.649	-0.04773729
		0.65	-0.04815785
		0.65	-0.05010565
		0.651	-0.05026696
		0.652	-0.04921179
		0.652	-0.04911337
		0.653	-0.05068623
		0.653	-0.05174614
		0.654	-0.05207429
		0.655	-0.05255627
		0.655	-0.05180409
		0.656	-0.05171785
		0.656	-0.05209976
		0.657	-0.05140473
		0.658	-0.05193429
		0.658	-0.05161273
		0.659	-0.05163097
		0.659	-0.05236252
		0.66	-0.05223388
		0.66	-0.05097059
		0.661	-0.0509374
		0.662	-0.05188794
		0.662	-0.05254242
		0.663	-0.05094066
		0.663	-0.05071528
		0.664	-0.05156542
		0.665	-0.05272837
		0.665	-0.05210944
		0.666	-0.05107746
		0.666	-0.0518085
		0.667	-0.05234516
		0.668	-0.05244322
		0.668	-0.05205268
		0.669	-0.05103094
		0.669	-0.05143229
		0.67	-0.05184333
		0.671	-0.05333507
		0.671	-0.05512602
		0.672	-0.05632919
		0.672	-0.05717062
		0.673	-0.05933354
		0.673	-0.06126258
		0.674	-0.06136405
		0.675	-0.0620986
		0.675	-0.06373756
		0.676	-0.06548754
		0.676	-0.06527465
		0.677	-0.06608586
		0.678	-0.06739195
		0.678	-0.06790302
		0.679	-0.06918598
		0.679	-0.07057
		0.68	-0.07256547
		0.681	-0.07376058
		0.681	-0.07575994
		0.682	-0.07828674
		0.682	-0.07669786
		0.683	-0.07625806
		0.684	-0.07651278
		0.684	-0.07956243
		0.685	-0.08141474
		0.685	-0.07971381
		0.686	-0.08179377
		0.686	-0.08147632
		0.687	-0.08255739
		0.688	-0.07994682
		0.688	-0.08025105
		0.689	-0.0810826
		0.689	-0.08205128
		0.69	-0.08212898
		0.691	-0.0804095
		0.691	-0.08169771
		0.692	-0.08317018
		0.692	-0.08394516
		0.693	-0.0849629
		0.694	-0.08329312
		0.694	-0.08273987
		0.695	-0.08247653
		0.695	-0.08179562
		0.696	-0.07966451
		0.696	-0.07893623
		0.697	-0.08132669
		0.698	-0.08204942
		0.698	-0.07915055
		0.699	-0.07577225
		0.699	-0.0760079
		0.7	-0.07590293
		0.701	-0.0736151
		0.701	-0.07301829
		0.702	-0.07301291
		0.702	-0.07297776
		0.703	-0.07331567
		0.704	-0.07290486
		0.704	-0.07136796
		0.705	-0.07054072
		0.705	-0.07033185
		0.706	-0.0698593
		0.707	-0.06959424
		0.707	-0.06979028
		0.708	-0.06914951
		0.708	-0.07020336
		0.709	-0.07127191
		0.709	-0.07165963
		0.71	-0.07090673
		0.711	-0.06997447
		0.711	-0.06907159
		0.712	-0.06863036
		0.712	-0.07018632
		0.713	-0.07248451
		0.714	-0.0744433
		0.714	-0.07509406
		0.715	-0.07758517
		0.715	-0.08125764
		0.716	-0.08168313
		0.717	-0.08193382
		0.717	-0.08226485
		0.718	-0.08253726
		0.718	-0.08282192
		0.719	-0.08425067
		0.72	-0.08598459
		0.72	-0.08491945
		0.721	-0.08468733
		0.721	-0.08407158
		0.722	-0.08349571
		0.722	-0.0833594
		0.723	-0.08296949
		0.724	-0.08157149
		0.724	-0.08117741
		0.725	-0.08195787
		0.725	-0.08240722
		0.726	-0.08375306
		0.727	-0.08224719
		0.727	-0.08244322
		0.728	-0.08069335
		0.728	-0.08060353
		0.729	-0.08174559
		0.73	-0.07978905
		0.73	-0.08015866
		0.731	-0.08266023
		0.731	-0.08296002
		0.732	-0.08374654
		0.732	-0.08232107
		0.733	-0.08347582
		0.734	-0.08241172
		0.734	-0.08150426
		0.735	-0.0826215
		0.735	-0.0816937
		0.736	-0.08176596
		0.737	-0.08265043
		0.737	-0.08315073
		0.738	-0.08517117
		0.738	-0.08620542
		0.739	-0.0869862
		0.74	-0.08671005
		0.74	-0.08716112
		0.741	-0.08838612
		0.741	-0.08971883
		0.742	-0.09086376
		0.743	-0.09200632
		0.743	-0.09036643
		0.744	-0.0892197
		0.744	-0.08897301
		0.745	-0.08741394
		0.745	-0.08605056
		0.746	-0.08527544
		0.747	-0.08509359
		0.747	-0.08551519
		0.748	-0.08545015
		0.748	-0.08536309
		0.749	-0.08610941
		0.75	-0.08784276
		0.75	-0.08970185
		0.751	-0.09025081
		0.751	-0.09095008
		0.752	-0.09082744
		0.753	-0.09174658
		0.753	-0.09215055
		0.754	-0.09388584
		0.754	-0.09589345
		0.755	-0.09554125
		0.756	-0.0955306
		0.756	-0.09673626
		0.757	-0.09654281
		0.757	-0.09776475
		0.758	-0.09900142
		0.758	-0.09957501
		0.759	-0.1003617
		0.76	-0.1016451
		0.76	-0.1024992
		0.761	-0.102864
		0.761	-0.1041387
		0.762	-0.1053799
		0.763	-0.1062846
		0.763	-0.1087338
		0.764	-0.1100907
		0.764	-0.1097255
		0.765	-0.1100668
		0.766	-0.1113107
		0.766	-0.11229
		0.767	-0.1123481
		0.767	-0.1124242
		0.768	-0.1134363
		0.768	-0.1145866
		0.769	-0.1146046
		0.77	-0.1142545
		0.77	-0.1138172
		0.771	-0.1130677
		0.771	-0.1115879
		0.772	-0.1104749
		0.773	-0.1098946
		0.773	-0.1097108
		0.774	-0.1088555
		0.774	-0.1077213
		0.775	-0.1072028
		0.776	-0.1069622
		0.776	-0.1064672
		0.777	-0.1072369
		0.777	-0.1072252
		0.778	-0.1059332
		0.779	-0.1067665
		0.779	-0.1080145
		0.78	-0.1071945
		0.78	-0.1063367
		0.781	-0.1063405
		0.781	-0.1054408
		0.782	-0.1040477
		0.783	-0.1025278
		0.783	-0.1022559
		0.784	-0.1026063
		0.784	-0.1034571
		0.785	-0.1030409
		0.786	-0.1029243
		0.786	-0.1046613
		0.787	-0.1075272
		0.787	-0.1088552
		0.788	-0.1099943
		0.789	-0.1110046
		0.789	-0.1128075
		0.79	-0.1149013
		0.79	-0.1166882
		0.791	-0.1163743
		0.792	-0.1153953
		0.792	-0.1167895
		0.793	-0.1180517
		0.793	-0.1161425
		0.794	-0.1134277
		0.794	-0.1126399
		0.795	-0.1131135
		0.796	-0.1128386
		0.796	-0.1145716
		0.797	-0.1157516
		0.797	-0.1166624
		0.798	-0.11633
		0.799	-0.1152432
		0.799	-0.11628
		0.8	-0.1177678
		0.8	-0.1174458
		0.801	-0.1157268
		0.802	-0.11325
		0.802	-0.1115298
		0.803	-0.112744
		0.803	-0.1125983
		0.804	-0.1114561
		0.804	-0.1095751
		0.805	-0.1099458
		0.806	-0.1107775
		0.806	-0.1104143
		0.807	-0.1105307
		0.807	-0.1114926
		0.808	-0.1138954
		0.809	-0.1161224
		0.809	-0.1171694
		0.81	-0.1164062
		0.81	-0.115857
		0.811	-0.1150589
		0.812	-0.1143332
		0.812	-0.1149166
		0.813	-0.1150315
		0.813	-0.1163534
		0.814	-0.1156898
		0.815	-0.1156544
		0.815	-0.1156229
		0.816	-0.1179448
		0.816	-0.1207129
		0.817	-0.121671
		0.817	-0.1216752
		0.818	-0.1228265
		0.819	-0.1248127
		0.819	-0.1265379
		0.82	-0.1272269
		0.82	-0.128553
		0.821	-0.1285026
		0.822	-0.1280782
		0.822	-0.1281891
		0.823	-0.1283689
		0.823	-0.1293835
		0.824	-0.1296858
		0.825	-0.1317838
		0.825	-0.1320442
		0.826	-0.1350243
		0.826	-0.1360841
		0.827	-0.1369623
		0.828	-0.1365703
		0.828	-0.1376591
		0.829	-0.13863
		0.829	-0.1412682
		0.83	-0.1417746
		0.83	-0.1403598
		0.831	-0.1393033
		0.832	-0.1389836
		0.832	-0.1386687
		0.833	-0.1370575
		0.833	-0.1369317
		0.834	-0.1357601
		0.835	-0.1360306
		0.835	-0.1363123
		0.836	-0.1375537
		0.836	-0.1376177
		0.837	-0.1370188
		0.838	-0.1368338
		0.838	-0.135014
		0.839	-0.134497
		0.839	-0.1324502
		0.84	-0.13446
		0.84	-0.1314677
		0.841	-0.1314502
		0.842	-0.1307142
		0.842	-0.1304995
		0.843	-0.1294324
		0.843	-0.127414
		0.844	-0.1266616
		0.845	-0.1266875
		0.845	-0.1275573
		0.846	-0.1286465
		0.846	-0.1278805
		0.847	-0.126654
		0.848	-0.1269989
		0.848	-0.1268281
		0.849	-0.1268647
		0.849	-0.1262642
		0.85	-0.1252468
		0.851	-0.1240834
		0.851	-0.122861
		0.852	-0.1214393
		0.852	-0.1214183
		0.853	-0.1213644
		0.853	-0.1224993
		0.854	-0.1228405
		0.855	-0.1224676
		0.855	-0.1233953
		0.856	-0.1241222
		0.856	-0.1240779
		0.857	-0.1235823
		0.858	-0.1244091
		0.858	-0.1253024
		0.859	-0.1256193
		0.859	-0.1247861
		0.86	-0.1237945
		0.861	-0.1224085
		0.861	-0.1231766
		0.862	-0.1241808
		0.862	-0.1248495
		0.863	-0.1255517
		0.864	-0.1249321
		0.864	-0.1258964
		0.865	-0.1262908
		0.865	-0.127523
		0.866	-0.1288137
		0.866	-0.129498
		0.867	-0.1297148
		0.868	-0.1302541
		0.868	-0.1302587
		0.869	-0.129991
		0.869	-0.1315196
		0.87	-0.1318718
		0.871	-0.1317448
		0.871	-0.133407
		0.872	-0.1347669
		0.872	-0.1350806
		0.873	-0.1344444
		0.874	-0.1339238
		0.874	-0.1348859
		0.875	-0.1366521
		0.875	-0.1378833
		0.876	-0.1384964
		0.876	-0.1383629
		0.877	-0.1389336
		0.878	-0.1395997
		0.878	-0.140125
		0.879	-0.1411192
		0.879	-0.1415359
		0.88	-0.1417046
		0.881	-0.141879
		0.881	-0.142114
		0.882	-0.1425961
		0.882	-0.142643
		0.883	-0.1425728
		0.884	-0.1434549
		0.884	-0.1421594
		0.885	-0.1413505
		0.885	-0.1407578
		0.886	-0.1398797
		0.887	-0.1390946
		0.887	-0.1396889
		0.888	-0.1414295
		0.888	-0.1418022
		0.889	-0.1413273
		0.889	-0.1414206
		0.89	-0.1433357
		0.891	-0.1447678
		0.891	-0.1449295
		0.892	-0.1438127
		0.892	-0.1446517
		0.893	-0.1445457
		0.894	-0.1437534
		0.894	-0.1448214
		0.895	-0.1455599
		0.895	-0.1459067
		0.896	-0.1473443
		0.897	-0.148337
		0.897	-0.1506533
		0.898	-0.1521743
		0.898	-0.1521762
		0.899	-0.152443
		0.899	-0.1520112
		0.9	-0.152013
		0.901	-0.1526859
		0.901	-0.1536344
		0.902	-0.1528994
		0.902	-0.1528206
		0.903	-0.153428
		0.904	-0.1528299
		0.904	-0.1527766
		0.905	-0.1516338
		0.905	-0.1522085
		0.906	-0.1530241
		0.907	-0.1543351
		0.907	-0.1532541
		0.908	-0.1544619
		0.908	-0.1560063
		0.909	-0.1550286
		0.91	-0.1543938
		0.91	-0.1544007
		0.911	-0.1527038
		0.911	-0.1514143
		0.912	-0.1515716
		0.912	-0.1507727
		0.913	-0.1522239
		0.914	-0.1545483
		0.914	-0.1553928
		0.915	-0.1544264
		0.915	-0.1547327
		0.916	-0.1551617
		0.917	-0.1554423
		0.917	-0.1554726
		0.918	-0.1559217
		0.918	-0.1553465
		0.919	-0.1528905
		0.92	-0.1514536
		0.92	-0.1499037
		0.921	-0.1476754
		0.921	-0.1479226
		0.922	-0.1472426
		0.923	-0.1462402
		0.923	-0.1452166
		0.924	-0.1455742
		0.924	-0.1458476
		0.925	-0.1464776
		0.925	-0.147044
		0.926	-0.1461544
		0.927	-0.1451973
		0.927	-0.1443083
		0.928	-0.1429839
		0.928	-0.1421628
		0.929	-0.1429649
		0.93	-0.1432588
		0.93	-0.1425466
		0.931	-0.1420903
		0.931	-0.1425617
		0.932	-0.14177
		0.933	-0.1406592
		0.933	-0.1421175
		0.934	-0.143665
		0.934	-0.1455461
		0.935	-0.1486553
		0.935	-0.1487815
		0.936	-0.1491943
		0.937	-0.1499201
		0.937	-0.1500323
		0.938	-0.1505401
		0.938	-0.1508381
		0.939	-0.1513169
		0.94	-0.1511708
		0.94	-0.1522945
		0.941	-0.1525785
		0.941	-0.1527926
		0.942	-0.1531535
		0.943	-0.1536369
		0.943	-0.1533667
		0.944	-0.1550914
		0.944	-0.1557674
		0.945	-0.1565026
		0.946	-0.1573124
		0.946	-0.1581152
		0.947	-0.1610213
		0.947	-0.1620876
		0.948	-0.1624375
		0.948	-0.1625723
		0.949	-0.1611936
		0.95	-0.1606462
		0.95	-0.1609541
		0.951	-0.161369
		0.951	-0.1619352
		0.952	-0.1627709
		0.953	-0.1624026
		0.953	-0.1628294
		0.954	-0.1633423
		0.954	-0.1655231
		0.955	-0.1664905
		0.956	-0.1683299
		0.956	-0.1678817
		0.957	-0.1665394
		0.957	-0.1655575
		0.958	-0.1647912
		0.959	-0.162681
		0.959	-0.161876
		0.96	-0.1623537
		0.96	-0.1609904
		0.961	-0.1591985
		0.961	-0.1588781
		0.962	-0.1582766
		0.963	-0.1586604
		0.963	-0.1591873
		0.964	-0.1591405
		0.964	-0.1586039
		0.965	-0.1578943
		0.966	-0.1578524
		0.966	-0.1569994
		0.967	-0.1559695
		0.967	-0.1557682
		0.968	-0.1554474
		0.969	-0.1539512
		0.969	-0.1538457
		0.97	-0.1530932
		0.97	-0.1529622
		0.971	-0.1543964
		0.971	-0.1558281
		0.972	-0.1568222
		0.973	-0.1579359
		0.973	-0.1600934
		0.974	-0.1621469
		0.974	-0.161775
		0.975	-0.1625055
		0.976	-0.1647954
		0.976	-0.1649997
		0.977	-0.1663215
		0.977	-0.1676878
		0.978	-0.1678053
		0.979	-0.167293
		0.979	-0.1677383
		0.98	-0.1675423
		0.98	-0.1668784
		0.981	-0.168457
		0.982	-0.1686068
		0.982	-0.1686076
		0.983	-0.1682047
		0.983	-0.1673929
		0.984	-0.1667413
		0.984	-0.1661155
		0.985	-0.1667946
		0.986	-0.1686101
		0.986	-0.169808
		0.987	-0.1709715
		0.987	-0.1715719
		0.988	-0.170209
		0.989	-0.168856
		0.989	-0.1696431
		0.99	-0.1693161
		0.99	-0.1687059
		0.991	-0.1697016
		0.992	-0.1697581
		0.992	-0.1677365
		0.993	-0.1660577
		0.993	-0.166787
		0.994	-0.1688895
		0.995	-0.1704315
		0.995	-0.1689472
		0.996	-0.1674819
		0.996	-0.1694744
		0.997	-0.1714505
		0.997	-0.1730461
		0.998	-0.1741469
		0.999	-0.1769148
		0.999	-0.177068
		1	-0.1765779
		1	-0.1797048
		1.001	-0.1799265
		1.002	-0.1785795
		1.002	-0.1777146
		1.003	-0.1778687
		1.003	-0.1798113
		1.004	-0.1785651
		1.005	-0.1779314
		1.005	-0.1778899
		1.006	-0.1786067
		1.006	-0.1788857
		1.007	-0.179539
		1.007	-0.1809559
		1.008	-0.1813499
		1.009	-0.1813298
		1.009	-0.1811125
		1.01	-0.1812739
		1.01	-0.1801363
		1.011	-0.1785965
		1.012	-0.1770507
		1.012	-0.1751295
		1.013	-0.1745966
		1.013	-0.1750108
		1.014	-0.174098
		1.015	-0.1740545
		1.015	-0.1743123
		1.016	-0.1745436
		1.016	-0.1727916
		1.017	-0.1720957
		1.018	-0.172617
		1.018	-0.1738374
		1.019	-0.1739302
		1.019	-0.1733469
		1.02	-0.1722912
		1.02	-0.1715934
		1.021	-0.171134
		1.022	-0.170916
		1.022	-0.1711338
		1.023	-0.1720331
		1.023	-0.1725809
		1.024	-0.171327
		1.025	-0.1718574
		1.025	-0.1721551
		1.026	-0.1706176
		1.026	-0.1686462
		1.027	-0.1671912
		1.028	-0.1677455
		1.028	-0.1672966
		1.029	-0.1665573
		1.029	-0.1656412
		1.03	-0.1638878
		1.031	-0.1631887
		1.031	-0.1631323
		1.032	-0.1632024
		1.032	-0.1629452
		1.033	-0.1628789
		1.033	-0.1625509
		1.034	-0.159924
		1.035	-0.1576751
		1.035	-0.1573623
		1.036	-0.1572491
		1.036	-0.1562588
		1.037	-0.1560513
		1.038	-0.1557591
		1.038	-0.1557903
		1.039	-0.1541519
		1.039	-0.1532439
		1.04	-0.1519142
		1.041	-0.1529335
		1.041	-0.1526742
		1.042	-0.1523232
		1.042	-0.1525988
		1.043	-0.1515117
		1.043	-0.1513654
		1.044	-0.1508579
		1.045	-0.14916
		1.045	-0.1493153
		1.046	-0.149631
		1.046	-0.1494462
		1.047	-0.1505725
		1.048	-0.1516904
		1.048	-0.1536181
		1.049	-0.1565294
		1.049	-0.1581782
		1.05	-0.1596286
		1.051	-0.1605456
		1.051	-0.16149
		1.052	-0.1624027
		1.052	-0.1638622
		1.053	-0.1666802
		1.054	-0.1694068
		1.054	-0.1709277
		1.055	-0.1723087
		1.055	-0.1747489
		1.056	-0.1767744
		1.056	-0.1771778
		1.057	-0.1788774
		1.058	-0.1818998
		1.058	-0.1844948
		1.059	-0.1869592
		1.059	-0.190761
		1.06	-0.1944175
		1.061	-0.1975188
		1.061	-0.1994696
		1.062	-0.2015282
		1.062	-0.2029035
		1.063	-0.203178
		1.064	-0.2039388
		1.064	-0.2050331
		1.065	-0.2060055
		1.065	-0.2079198
		1.066	-0.2111494
		1.067	-0.2123262
		1.067	-0.2149053
		1.068	-0.2176524
		1.068	-0.2205148
		1.069	-0.2217836
		1.069	-0.2225172
		1.07	-0.2230945
		1.071	-0.2250725
		1.071	-0.2264992
		1.072	-0.2277603
		1.072	-0.2282287
		1.073	-0.2286643
		1.074	-0.2297826
		1.074	-0.2306777
		1.075	-0.2312794
		1.075	-0.2324083
		1.076	-0.2334742
		1.077	-0.234723
		1.077	-0.2368703
		1.078	-0.2379978
		1.078	-0.2383097
		1.079	-0.2386762
		1.079	-0.2399311
		1.08	-0.2412348
		1.081	-0.2407718
		1.081	-0.2403366
		1.082	-0.2399461
		1.082	-0.2376822
		1.083	-0.235612
		1.084	-0.2344929
		1.084	-0.2351543
		1.085	-0.2346999
		1.085	-0.2337085
		1.086	-0.2322351
		1.087	-0.2309252
		1.087	-0.2299721
		1.088	-0.2298022
		1.088	-0.2291338
		1.089	-0.2270315
		1.09	-0.2260154
		1.09	-0.2246654
		1.091	-0.2231449
		1.091	-0.2209177
		1.092	-0.2192416
		1.092	-0.2175739
		1.093	-0.2163211
		1.094	-0.2153939
		1.094	-0.2141511
		1.095	-0.2118722
		1.095	-0.2088852
		1.096	-0.20698
		1.097	-0.2068709
		1.097	-0.2056744
		1.098	-0.2059016
		1.098	-0.2060072
		1.099	-0.2034408
		1.1	-0.2019889
		1.1	-0.2016088
		1.101	-0.2010081
		1.101	-0.2015569
		1.102	-0.200513
		1.103	-0.197834
		1.103	-0.1951481
		1.104	-0.1940848
		1.104	-0.1927428
		1.105	-0.1916414
		1.105	-0.1917241
		1.106	-0.1916326
		1.107	-0.1893354
		1.107	-0.1884488
		1.108	-0.1881476
		1.108	-0.1871469
		1.109	-0.1858423
		1.11	-0.185932
		1.11	-0.1860272
		1.111	-0.1859046
		1.111	-0.184935
		1.112	-0.1832091
		1.113	-0.1806164
		1.113	-0.1789061
		1.114	-0.1785567
		1.114	-0.1767276
		1.115	-0.1758839
		1.115	-0.1746526
		1.116	-0.1724459
		1.117	-0.1728648
		1.117	-0.1738559
		1.118	-0.1731889
		1.118	-0.1720498
		1.119	-0.1717152
		1.12	-0.1708906
		1.12	-0.1686998
		1.121	-0.1705118
		1.121	-0.1727836
		1.122	-0.1726486
		1.123	-0.1739874
		1.123	-0.1748089
		1.124	-0.1745336
		1.124	-0.1756826
		1.125	-0.1767436
		1.126	-0.1751449
		1.126	-0.1760504
		1.127	-0.1769462
		1.127	-0.1789278
		1.128	-0.179606
		1.128	-0.1837704
		1.129	-0.1860079
		1.13	-0.1853254
		1.13	-0.1873356
		1.131	-0.1877076
		1.131	-0.1864009
		1.132	-0.1890904
		1.133	-0.1909233
		1.133	-0.1928316
		1.134	-0.1946797
		1.134	-0.196944
		1.135	-0.1978211
		1.136	-0.196958
		1.136	-0.1941939
		1.137	-0.1928424
		1.137	-0.193542
		1.138	-0.1940193
		1.139	-0.1920764
		1.139	-0.1909317
		1.14	-0.1900001
		1.14	-0.1899545
		1.141	-0.1907728
		1.141	-0.1909389
		1.142	-0.1888614
		1.143	-0.1882327
		1.143	-0.1858432
		1.144	-0.1843717
		1.144	-0.186532
		1.145	-0.1861634
		1.146	-0.1867481
		1.146	-0.1868841
		1.147	-0.1850953
		1.147	-0.184089
		1.148	-0.1830204
		1.149	-0.1827088
		1.149	-0.1822526
		1.15	-0.1832139
		1.15	-0.1827471
		1.151	-0.1829613
		1.151	-0.1829589
		1.152	-0.1806969
		1.153	-0.1795838
		1.153	-0.1797654
		1.154	-0.1791953
		1.154	-0.1774415
		1.155	-0.1770024
		1.156	-0.1779884
		1.156	-0.1791821
		1.157	-0.1805508
		1.157	-0.180447
		1.158	-0.1800627
		1.159	-0.1790033
		1.159	-0.1775853
		1.16	-0.1775036
		1.16	-0.1785624
		1.161	-0.1790395
		1.162	-0.1791275
		1.162	-0.1784832
		1.163	-0.1772492
		1.163	-0.1757219
		1.164	-0.1748844
		1.164	-0.1731575
		1.165	-0.1727545
		1.166	-0.1735578
		1.166	-0.1749205
		1.167	-0.1770375
		1.167	-0.1789939
		1.168	-0.1793622
		1.169	-0.181034
		1.169	-0.1829528
		1.17	-0.1833497
		1.17	-0.1828112
		1.171	-0.1832452
		1.172	-0.184924
		1.172	-0.185932
		1.173	-0.1876253
		1.173	-0.1887059
		1.174	-0.1913458
		1.175	-0.1926236
		1.175	-0.1905737
		1.176	-0.1901572
		1.176	-0.190643
		1.177	-0.1917313
		1.177	-0.1911162
		1.178	-0.1919743
[truncated: 38,584 more rows]
