# Supplementary material for: Structure of Mycobacterium tuberculosis cytochrome bcc in complex with Q203 and TB47, two anti-TB drug candidates
Source: eLife. 2021 Nov 25;10:e69418. doi: 10.7554/eLife.69418 (PMC8616580; doi:10.7554/eLife.69418)
Supplement: Figure 2—source data 1. [file elife-69418-fig2-data1.xlsx]

## Sheet: Summary
Experiment	Experiment 1	Experiment 2	Experiment 3	Experiment 4	Mean (μM·s-1)	S.D. (μM·s-1)
OCR without bcc (μM·s-1)	0.23793	0.18448	0.22439		0.2156	0.02779
OCR with bcc (μM·s-1)	0.59237	0.60719	0.54696	0.57444	0.58024	0.02591
Enzyme concentration (nM)	62.5	62.5	62.5	62.5
	Turnover number (e-·s-1)					S.D. (e-·s-1)
Substrate autoxidation	13.7984					1.77856
Protein oxygen consumption	23.337					2.43167

## Sheet: Substrate autoxidation
Experiment 1		Experiment 2		Experiment 3
RECORDED DATA		RECORDED DATA		RECORDED DATA
TIME (s)	OXYGEN (μM)	TIME (s)	OXYGEN (μM)	TIME (s)	OXYGEN (μM)
Time	Oxygen 1	Time	Oxygen 1	Time	Oxygen 1
0	293.658	0	264.97	0	263.593
1	293.557	1	264.929	1	263.564
2	293.464	2	264.899	2	263.567
3	293.333	3	264.875	3	263.575
4	293.143	4	264.793	4	263.616
5	293.022	5	264.661	5	263.616
6	293.002	6	264.588	6	263.601
7	292.997	7	264.551	7	263.653
8	292.913	8	264.518	8	263.723
9	292.852	9	264.503	9	263.776
10	292.711	10	264.498	10	263.777
11	292.631	11	264.449	11	263.745
12	292.689	12	264.403	12	263.718
13	292.664	13	264.337	13	263.632
14	292.534	14	264.256	14	263.585
15	292.513	15	264.197	15	263.509
16	292.569	16	264.15	16	263.454
17	292.493	17	264.12	17	263.459
18	292.291	18	264.1	18	263.58
19	292.19	19	264.037	19	263.718
20	292.164	20	263.988	20	263.798
21	292.14	21	263.953	21	263.807
22	292.072	22	263.898	22	263.746
23	292.015	23	263.841	23	263.662
24	291.963	24	263.847	24	263.589
25	291.871	25	263.769	25	263.526
26	291.796	26	263.612	26	263.477
27	291.787	27	263.518	27	263.401
28	291.682	28	263.466	28	263.369
29	291.638	29	263.393	29	263.431
30	291.558	30	263.243	30	263.45
31	291.511	31	263.139	31	263.417
32	291.417	32	263.115	32	263.344
33	291.31	33	263.094	33	263.293
34	291.235	34	263.058	34	263.267
35	291.177	35	263.015	35	263.257
36	291.207	36	262.977	36	263.249
37	291.252	37	262.935	37	263.318
38	291.21	38	262.85	38	263.325
39	291.169	39	262.776	39	263.234
40	291.135	40	262.742	40	263.151
41	291.028	41	262.786	41	263.116
42	290.994	42	262.801	42	263.108
43	290.987	43	262.762	43	263.161
44	290.85	44	262.715	44	263.202
45	290.679	45	262.691	45	263.219
46	290.664	46	262.617	46	263.243
47	290.67	47	262.484	47	263.216
48	290.563	48	262.365	48	263.15
49	290.544	49	262.307	49	263.094
50	290.529	50	262.283	50	263.064
51	290.48	51	262.265	51	263.1
52	290.379	52	262.256	52	263.122
53	290.287	53	262.232	53	263.078
54	290.178	54	262.183	54	263.042
55	290.072	55	262.156	55	263.122
56	289.961	56	262.116	56	263.223
57	289.941	57	262.064	57	263.24
58	289.901	58	262.036	58	263.248
59	289.806	59	261.989	59	263.223
60	289.64	60	261.971	60	263.166
61	289.465	61	261.92	61	263.178
62	289.054	62	261.807	62	263.146
63	288.675	63	261.7	63	263.067
64	288.395	64	261.654	64	263.082
65	288.135	65	261.627	65	263.123
66	288.055	66	261.554	66	263.106
67	288.207	67	261.496	67	263.058
68	288.33	68	261.444	68	263.049
69	288.259	69	261.386	69	263.089
70	288.016	70	261.352	70	263.054
71	287.65	71	261.312	71	263.023
72	287.437	72	261.234	72	263.089
73	287.351	73	261.173	73	263.14
74	287.093	74	261.122	74	263.152
75	286.624	75	261.105	75	263.145
76	286.239	76	261.124	76	263.12
77	285.895	77	261.127	77	263.111
78	285.664	78	261.116	78	263.045
79	285.528	79	261.083	79	262.942
80	285.421	80	261.004	80	262.841
81	285.301	81	260.896	81	262.796
82	285.146	82	260.813	82	262.762
83	284.903	83	260.79	83	262.771
84	284.638	84	260.737	84	262.764
85	284.368	85	260.714	85	262.73
86	284.036	86	260.678	86	262.711
87	283.759	87	260.612	87	262.75
88	283.493	88	260.584	88	262.793
89	283.103	89	260.56	89	262.823
90	282.759	90	260.503	90	262.761
91	282.408	91	260.392	91	262.702
92	282.002	92	260.245	92	262.652
93	281.614	93	260.147	93	262.667
94	281.271	94	260.119	94	262.657
95	281.045	95	260.129	95	262.717
96	280.864	96	260.097	96	262.752
97	280.706	97	260.1	97	262.73
98	280.506	98	260.117	98	262.758
99	280.318	99	260.102	99	262.778
100	280.123	100	260.064	100	262.739
101	280.007	101	259.977	101	262.75
102	279.828	102	259.953	102	262.781
103	279.696	103	259.914	103	262.788
104	279.533	104	259.866	104	262.733
105	279.218	105	259.873	105	262.641
106	278.796	106	259.863	106	262.555
107	278.416	107	259.82	107	262.516
108	278.055	108	259.801	108	262.546
109	277.79	109	259.754	109	262.552
110	277.603	110	259.689	110	262.467
111	277.332	111	259.61	111	262.387
112	277.018	112	259.553	112	262.344
113	276.86	113	259.492	113	262.352
114	276.785	114	259.366	114	262.337
115	276.582	115	259.23	115	262.301
116	276.223	116	259.163	116	262.302
117	275.892	117	259.105	117	262.35
118	275.682	118	259.061	118	262.369
119	275.525	119	259.014	119	262.377
120	275.374	120	258.951	120	262.362
121	275.275	121	258.956	121	262.341
122	275.105	122	258.96	122	262.335
123	274.829	123	258.92	123	262.329
124	274.572	124	258.862	124	262.326
125	274.306	125	258.826	125	262.331
126	274.094	126	258.735	126	262.343
127	273.872	127	258.266	127	262.299
128	273.678	128	257.552	128	262.219
129	273.384	129	256.784	129	262.143
130	273.102	130	256.081	130	262.177
131	272.951	131	255.566	131	262.151
132	272.742	132	254.894	132	262.071
133	272.45	133	254.236	133	262.008
134	272.266	134	253.938	134	261.975
135	272.184	135	253.67	135	261.961
136	271.96	136	253.528	136	261.966
137	271.692	137	253.472	137	262.02
138	271.33	138	253.439	138	262.01
139	271.017	139	253.407	139	261.947
140	270.696	140	253.252	140	261.919
141	270.467	141	253.106	141	261.905
142	270.34	142	252.963	142	261.929
143	270.137	143	252.803	143	261.923
144	269.932	144	252.733	144	261.926
145	269.772	145	252.688	145	262.012
146	269.648	146	252.705	146	262.013
147	269.476	147	252.807	147	261.917
148	269.272	148	252.81	148	261.835
149	268.965	149	252.775	149	261.655
150	268.808	150	252.805	150	261.494
151	268.677	151	252.836	151	261.389
152	268.558	152	252.841	152	261.384
153	268.444	153	252.774	153	261.374
154	268.32	154	252.633	154	261.024
155	268.109	155	252.606	155	260.661
156	267.913	156	252.629	156	260.24
157	267.717	157	252.61	157	259.82
158	267.527	158	252.458	158	259.521
159	267.36	159	252.301	159	259.297
160	267.296	160	252.169	160	259.14
161	267.303	161	252.037	161	259.031
162	267.11	162	251.897	162	258.942
163	266.85	163	251.809	163	258.83
164	266.587	164	251.744	164	258.768
165	266.37	165	251.674	165	258.732
166	266.216	166	251.593	166	258.752
167	266.009	167	251.46	167	258.756
168	265.947	168	251.351	168	258.8
169	265.875	169	251.399	169	258.849
170	265.677	170	251.44	170	258.855
171	265.419	171	251.337	171	258.806
172	265.19	172	251.173	172	258.697
173	264.893	173	251.012	173	258.5
174	264.668	174	250.909	174	258.376
175	264.51	175	250.831	175	258.346
176	264.361	176	250.797	176	258.271
177	264.147	177	250.799	177	258.18
178	263.933	178	250.726	178	258.064
179	263.748	179	250.681	179	257.953
180	263.671	180	250.566	180	257.888
181	263.655	181	250.435	181	257.758
182	263.533	182	250.312	182	257.622
183	263.409	183	250.168	183	257.438
184	263.288	184	250.037	184	257.307
185	263.17	185	249.845	185	257.205
186	263.012	186	249.603	186	257.089
187	262.839	187	249.362	187	257.002
188	262.654	188	249.067	188	256.866
189	262.561	189	248.846	189	256.731
190	262.495	190	248.691	190	256.545
191	262.428	191	248.464	191	256.364
192	262.381	192	248.289	192	256.207
193	262.349	193	248.122	193	256.1
194	262.274	194	247.983	194	255.972
195	262.09	195	247.889	195	255.794
196	261.997	196	247.809	196	255.567
197	261.866	197	247.69	197	255.391
198	261.875	198	247.48	198	255.207
199	261.922	199	247.234	199	255.005
200	261.797	200	247.013	200	254.771
201	261.591	201	246.784	201	254.564
202	261.507	202	246.52	202	254.372
203	261.358	203	246.229	203	254.174
204	261.146	204	246.025	204	253.998
205	260.909	205	245.941	205	253.824
206	260.714	206	245.879	206	253.663
207	260.55	207	245.738	207	253.442
208	260.399	208	245.635	208	253.237
209	260.202	209	245.571	209	253.051
210	260.065	210	245.572	210	252.862
211	260.027	211	245.428	211	252.665
212	259.944	212	245.243	212	252.48
213	259.78	213	245.096	213	252.316
214	259.584	214	244.945	214	252.189
215	259.485	215	244.616	215	252.03
216	259.506	216	244.283	216	251.887
217	259.42	217	244.033	217	251.72
218	259.354	218	243.807	218	251.498
		219	243.617	219	251.253
		220	243.432	220	250.933
		221	243.185	221	250.675
		222	242.936	222	250.498
		223	242.739	223	250.278
		224	242.612	224	250.09
		225	242.415	225	249.847
		226	242.217	226	249.563
		227	242.04	227	249.293
		228	241.817	228	249.06
		229	241.662	229	248.823
		230	241.589	230	248.623
		231	241.45	231	248.44
		232	241.274	232	248.231
		233	241.089	233	247.969
		234	240.877	234	247.672
		235	240.739	235	247.404
		236	240.602	236	247.131
		237	240.434	237	246.805
		238	240.23	238	246.515
		239	240.009	239	246.266
		240	239.85	240	246.038
		241	239.651	241	245.821
		242	239.456	242	245.634
		243	239.265	243	245.445
		244	239.023	244	245.253
		245	238.766	245	245.058
		246	238.553	246	244.81
		247	238.376	247	244.582
		248	238.228	248	244.337
		249	238.099	249	244.071
		250	238.011	250	243.878
		251	237.876	251	243.691
		252	237.67	252	243.375
		253	237.414	253	243.165
		254	237.231	254	243.029
		255	237.179	255	242.858
		256	237.153	256	242.636
		257	237.057	257	242.373
		258	236.937	258	242.151
		259	236.792	259	241.96
		260	236.589	260	241.746
		261	236.397	261	241.482
		262	236.212	262	241.255
		263	235.984	263	241.07
		264	235.752	264	240.9
		265	235.551	265	240.689
		266	235.379	266	240.467
		267	235.168	267	240.246
		268	234.918	268	240.066
		269	234.684	269	239.916
		270	234.502	270	239.756
		271	234.369	271	239.584
		272	234.223	272	239.38
		273	234.057	273	239.099
		274	233.893	274	238.868
		275	233.722	275	238.673
		276	233.621	276	238.482
		277	233.587	277	238.305
		278	233.573	278	238.104
		279	233.551	279	237.875
		280	233.476	280	237.707
		281	233.355	281	237.589
		282	233.245	282	237.405
		283	233.129	283	237.139
		284	232.986	284	236.86
		285	232.844	285	236.63
		286	232.748	286	236.426
		287	232.76	287	236.239
		288	232.674	288	236.08
		289	232.46	289	235.932
		290	232.236	290	235.751
		291	232.069	291	235.502
		292	231.971	292	235.31
		293	231.86	293	235.239
		294	231.746	294	235.192
		295	231.665	295	235.092
		296	231.641	296	235.019
		297	231.56	297	234.972
		298	231.384	298	234.915
		299	231.279	299	234.795
		300	231.165	300	234.6
		301	231.022	301	234.361
		302	230.892	302	234.121
		303	230.759	303	233.967
		304	230.61	304	233.86
		305	230.468	305	233.645
		306	230.377	306	233.443
		307	230.296	307	233.258
		308	230.229	308	233.148
		309	230.206	309	233.038
		310	230.188	310	232.873
		311	230.138	311	232.659
		312	230.064	312	232.534
		313	230.022	313	232.478
		314	229.945	314	232.414
		315	229.858	315	232.302
		316	229.769	316	232.148
		317	229.675	317	232.021
		318	229.591	318	231.805
		319	229.481	319	231.633
		320	229.368	320	231.539
		321	229.279	321	231.423
		322	229.205	322	231.319
		323	229.131	323	231.18
		324	229.072	324	230.996
		325	229.028	325	230.827
		326	229.054	326	230.631
		327	229.093	327	230.499
		328	229.109	328	230.431
		329	229.001	329	230.389
		330	228.886	330	230.35
		331	228.787	331	230.32
		332	228.682	332	230.286
		333	228.565	333	230.18
		334	228.394	334	230.041
		335	228.256	335	229.972
		336	228.209	336	229.953
		337	228.168	337	229.882
		338	228.137	338	229.763
		339	228.085	339	229.667
		340	227.976	340	229.615
		341	227.878	341	229.496
		342	227.789	342	229.343
		343	227.696	343	229.124
		344	227.581	344	228.949
		345	227.518	345	228.912
		346	227.528	346	228.94
		347	227.565	347	228.893
		348	227.583	348	228.764
		349	227.539	349	228.581
		350	227.474	350	228.378
		351	227.391	351	228.25
		352	227.242	352	228.172
		353	227.124	353	228.066
		354	227.071	354	227.917
		355	227.111	355	227.767
		356	227.2	356	227.668
		357	227.203	357	227.602
		358	227.119	358	227.503
		359	227.018	359	227.372
		360	226.938	360	227.251
		361	226.862	361	227.123
		362	226.811	362	226.968
		363	226.774	363	226.841
		364	226.72	364	226.795
		365	226.689	365	226.701
		366	226.621	366	226.573
		367	226.594	367	226.45
		368	226.524	368	226.361
		369	226.337	369	226.287
		370	226.209	370	226.268
		371	226.174	371	226.258
		372	226.182	372	226.186
		373	226.187	373	226.107
		374	226.114	374	225.997
		375	225.977	375	225.918
		376	225.892	376	225.851
		377	225.845	377	225.718
		378	225.909	378	225.606
		379	225.986	379	225.556
		380	226.015	380	225.461
		381	225.977	381	225.373
		382	225.931	382	225.263
		383	225.893	383	225.221
		384	225.925	384	225.202
		385	225.918	385	225.195
		386	225.882	386	225.157
		387	225.875	387	225.088
		388	225.831	388	224.976
		389	225.806	389	224.87
		390	225.802	390	224.808
		391	225.786	391	224.823
		392	225.71	392	224.849
		393	225.635	393	224.806
		394	225.647	394	224.656
		395	225.659	395	224.506
		396	225.622	396	224.326
		397	225.584	397	224.2
		398	225.577	398	224.134
		399	225.554	399	224.105
		400	225.597	400	224.074
		401	225.527	401	224.096
		402	225.381	402	224.088
		403	225.251	403	224.084
		404	225.205	404	223.99
		405	225.187	405	223.836
		406	225.138	406	223.734
		407	225.088	407	223.649
		408	225.088	408	223.603
		409	225.139	409	223.565
		410	225.236	410	223.492
		411	225.257	411	223.381
		412	225.256	412	223.255
		413	225.197	413	223.21
		414	225.126	414	223.154
		415	225.097	415	223.129
		416	225.031	416	223.118
		417	224.933	417	223.101
		418	224.943	418	223.014
		419	225.055	419	222.897
		420	225.084	420	222.804
		421	225.038	421	222.717
		422	224.921	422	222.641
		423	224.883	423	222.568
		424	224.837	424	222.493
				425	222.427
				426	222.344
				427	222.239
				428	222.17
				429	222.106
				430	222.054
				431	222.045
				432	222.04
				433	222.048
				434	222.045
				435	222.047
				436	222.051
				437	222.027

## Sheet: Protein oxygen consumption
Experiment 1		Experiment 2		Experiment 3		Experiment 4
RECORDED DATA		RECORDED DATA		RECORDED DATA		RECORDED DATA
TIME (s)	OXYGEN (μM)	TIME (s)	OXYGEN (μM)	TIME (s)	OXYGEN (μM)	TIME (s)	OXYGEN (μM)
Time	Oxygen 1	Time	Oxygen 1	Time	Oxygen 1	Time	Oxygen 1
0	309.888	0	296.097	0	293.061	0	287.824
1	310.373	1	295.659	1	292.726	1	287.816
2	310.854	2	295.145	2	292.545	2	287.852
3	311.349	3	294.741	3	292.428	3	287.808
4	311.749	4	294.421	4	292.231	4	287.766
5	312.154	5	294.063	5	292.157	5	287.723
6	312.615	6	293.807	6	292.213	6	287.683
7	313.034	7	293.644	7	292.352	7	287.673
8	313.328	8	293.539	8	292.4	8	287.617
9	313.456	9	293.486	9	292.266	9	287.552
10	313.455	10	293.445	10	292.149	10	287.483
11	313.385	11	293.356	11	292.091	11	287.469
12	313.179	12	293.371	12	292.067	12	287.485
13	313.043	13	293.214	13	292.104	13	287.507
14	312.992	14	293.134	14	292.119	14	287.516
15	312.985	15	293.047	15	292.24	15	287.496
16	313.149	16	292.96	16	292.339	16	287.375
17	313.264	17	292.837	17	292.248	17	287.333
18	313.114	18	292.683	18	292.055	18	287.309
19	313.222	19	292.579	19	291.92	19	287.314
20	313.23	20	292.468	20	291.879	20	287.374
21	313.179	21	292.415	21	291.806	21	287.343
22	313.029	22	292.421	22	291.845	22	287.271
23	312.849	23	292.458	23	291.913	23	287.179
24	312.794	24	292.498	24	291.89	24	287.016
25	312.813	25	292.503	25	291.881	25	286.916
26	312.819	26	292.446	26	291.872	26	286.834
27	312.893	27	292.296	27	291.82	27	286.842
28	312.981	28	292.196	28	291.852	28	286.818
29	312.922	29	292.088	29	291.885	29	286.822
30	312.827	30	291.973	30	291.952	30	286.794
31	312.944	31	291.99	31	292.018	31	286.704
32	312.974	32	292.112	32	291.933	32	286.596
33	313.055	33	292.176	33	291.918	33	286.558
34	313.233	34	292.064	34	291.845	34	286.583
35	313.362	35	291.99	35	291.654	35	286.57
36	313.468	36	291.811	36	291.524	36	286.583
37	313.471	37	291.678	37	291.567	37	286.432
38	313.563	38	291.672	38	291.586	38	286.274
39	313.661	39	291.609	39	291.661	39	286.248
40	313.764	40	291.481	40	291.752	40	286.215
41	313.818	41	291.371	41	291.798	41	286.2
42	313.928	42	291.235	42	291.825	42	286.156
43	313.941	43	291.258	43	291.81	43	286.125
44	313.965	44	291.272	44	291.854	44	286.051
45	314.095	45	291.314	45	291.827	45	286.002
46	314.087	46	291.328	46	291.719	46	285.99
47	314.091	47	291.27	47	291.673	47	285.991
48	314.115	48	291.227	48	291.482	48	285.948
49	314.127	49	291.162	49	291.38	49	285.886
50	314.117	50	291.031	50	291.446	50	285.913
51	314.12	51	290.831	51	291.527	51	285.927
52	314.201	52	290.75	52	291.669	52	285.951
53	314.181	53	290.798	53	291.726	53	285.898
54	314.241	54	290.899	54	291.683	54	285.789
55	314.283	55	291.001	55	291.536	55	285.752
56	314.36	56	290.947	56	291.262	56	285.7
57	314.43	57	290.767	57	291.136	57	285.707
58	314.574	58	290.757	58	291.13	58	285.62
59	314.604	59	290.81	59	291.058	59	285.452
60	314.65	60	290.74	60	290.992	60	285.351
61	314.758	61	290.592	61	291.063	61	285.3
62	314.846	62	290.537	62	291.139	62	285.231
63	314.803	63	290.651	63	291.189	63	285.146
64	314.681	64	290.677	64	291.211	64	284.929
65	314.572	65	290.618	65	291.27	65	284.779
66	314.459	66	290.564	66	291.328	66	284.827
67	314.4	67	290.568	67	291.36	67	284.845
68	314.377	68	290.489	68	291.333	68	284.874
69	314.278	69	290.421	69	291.246	69	284.781
70	314.261	70	290.465	70	291.169	70	284.659
71	314.282	71	290.637	71	291.001	71	284.735
72	314.328	72	290.655	72	290.881	72	284.884
73	314.399	73	290.542	73	290.865	73	284.921
74	314.52	74	290.358	74	290.859	74	284.816
75	314.442	75	290.24	75	290.864	75	284.696
76	314.245	76	290.226	76	290.875	76	284.722
77	314.112	77	290.1	77	290.85	77	284.826
78	314.166	78	289.977	78	290.771	78	284.849
79	314.235	79	289.955	79	290.854	79	284.761
80	314.263	80	289.992	80	290.941	80	284.766
81	314.262	81	289.933	81	290.799	81	284.783
82	314.25	82	289.832	82	290.694	82	284.718
83	314.249	83	289.841	83	290.699	83	284.651
84	314.267	84	289.893	84	290.702	84	284.618
85	314.221	85	289.837	85	290.6	85	284.631
86	314.078	86	289.778	86	290.457	86	284.584
87	314.042	87	289.815	87	290.415	87	284.51
88	314.046	88	289.847	88	290.44	88	284.382
89	313.968	89	289.713	89	290.335	89	284.305
90	313.959	90	289.632	90	290.185	90	284.248
91	313.899	91	289.563	91	290.197	91	284.186
92	313.767	92	289.455	92	290.233	92	284.17
93	313.7	93	289.286	93	290.238	93	284.135
94	313.71	94	289.162	94	290.107	94	284.019
95	313.552	95	289.188	95	289.98	95	284.019
96	313.376	96	289.254	96	289.917	96	284.033
97	313.344	97	289.224	97	289.914	97	284.046
98	313.381	98	289.101	98	289.887	98	284.023
99	313.339	99	288.947	99	289.903	99	284.002
100	313.329	100	288.843	100	289.98	100	283.924
101	313.316	101	288.934	101	290.023	101	283.885
102	313.287	102	289.081	102	290.002	102	283.904
103	313.242	103	289.173	103	289.969	103	283.885
104	313.195	104	289.159	104	289.794	104	283.791
105	313.191	105	289.102	105	289.68	105	283.721
106	313.138	106	289.073	106	289.569	106	283.718
107	312.98	107	289.012	107	289.472	107	283.662
108	312.8	108	288.89	108	289.435	108	283.629
109	312.5	109	288.82	109	289.541	109	283.653
110	312.448	110	288.658	110	289.653	110	283.616
111	312.419	111	288.456	111	289.607	111	283.596
112	312.383	112	288.417	112	289.59	112	283.578
113	312.353	113	288.458	113	289.279	113	283.455
114	312.306	114	288.539	114	288.713	114	282.941
115	312.306	115	288.513	115	288.382	115	282.51
116	312.307	116	288.476	116	288.037	116	282.299
117	312.154	117	288.403	117	287.981	117	281.934
118	311.988	118	288.294	118	288.081	118	281.745
119	311.846	119	288.28	119	288.047	119	281.711
120	311.764	120	288.211	120	287.799	120	281.604
121	311.74	121	288.113	121	287.542	121	281.286
122	311.725	122	287.973	122	287.091	122	280.969
123	311.781	123	287.875	123	286.392	123	280.549
124	311.58	124	287.743	124	285.62	124	280.058
125	311.166	125	287.585	125	284.963	125	279.453
126	310.233	126	287.567	126	284.318	126	278.661
127	309.736	127	287.596	127	283.539	127	277.916
128	309.346	128	287.626	128	282.583	128	277.153
129	309.007	129	287.603	129	281.679	129	276.341
130	308.743	130	287.625	130	280.794	130	275.5
131	308.557	131	287.649	131	279.943	131	274.657
132	308.5	132	287.528	132	279.089	132	273.763
133	308.302	133	287.441	133	278.233	133	272.898
134	308.028	134	287.386	134	277.382	134	272.105
135	307.619	135	287.428	135	276.525	135	271.397
136	306.97	136	287.425	136	275.71	136	270.587
137	306.247	137	287.411	137	274.986	137	269.683
138	305.388	138	287.348	138	274.234	138	268.882
139	304.419	139	287.251	139	273.471	139	268.183
140	303.435	140	287.233	140	272.783	140	267.538
141	302.422	141	287.148	141	272.083	141	266.908
142	301.475	142	286.963	142	271.436	142	266.188
143	300.55	143	286.941	143	270.748	143	265.462
144	299.74	144	287.104	144	270.042	144	264.833
145	298.785	145	287.234	145	269.435	145	264.318
146	297.715	146	287.281	146	268.945	146	263.808
147	296.821	147	287.289	147	268.431	147	263.13
148	296.02	148	287.211	148	267.883	148	262.455
149	295.157	149	287.106	149	267.282	149	261.896
150	294.407	150	286.94	150	266.682	150	261.269
151	293.758	151	286.824	151	266.191	151	260.674
152	292.991	152	286.82	152	265.619	152	260.128
153	292.156	153	286.723	153	265.058	153	259.496
154	291.486	154	286.49	154	264.589	154	258.855
155	290.891	155	286.314	155	264.288	155	258.279
156	290.225	156	286.283	156	263.851	156	257.843
157	289.596	157	286.225	157	263.354	157	257.445
158	288.959	158	286.202	158	262.891	158	257.087
159	288.342	159	286.206	159	262.469	159	256.684
160	287.778	160	286.212	160	262.079	160	256.272
161	287.184	161	286.202	161	261.632	161	255.91
162	286.586	162	286.088	162	261.224	162	255.604
163	286.026	163	286.025	163	260.952	163	255.225
164	285.47	164	286.024	164	260.745	164	254.819
165	284.962	165	286.144	165	260.495	165	254.565
166	284.438	166	286.217	166	260.207	166	254.291
167	283.669	167	286.265	167	259.92	167	253.997
168	282.995	168	286.134	168	259.594	168	253.675
169	282.612	169	285.964	169	259.398	169	253.36
170	282.318	170	286.03	170	259.213	170	252.975
171	282.041	171	286.016	171	259.03	171	252.719
172	281.794	172	285.834	172	258.838	172	252.609
173	281.565	173	286.019	173	258.638	173	252.479
174	281.334	174	285.572	174	258.483	174	252.314
175	281.051	175	285.645	175	258.292	175	252.094
176	280.652	176	285.474	176	258.078	176	251.879
177	280.314	177	285.141	177	257.959	177	251.665
178	280.161	178	284.831	178	257.73	178	251.482
179	279.897	179	284.361	179	257.455	179	251.302
180	279.65	180	283.901	180	257.249	180	251.066
181	279.514	181	283.327	181	257.17	181	250.88
182	279.39	182	282.634	182	257.125	182	250.738
183	279.269	183	281.801	183	257.108	183	250.656
184	279.177	184	280.927	184	257.053	184	250.644
185	279.102	185	280.004	185	256.965	185	250.605
186	278.953	186	279.156	186	256.806	186	250.561
187	278.707	187	278.308	187	256.569	187	250.467
188	278.524	188	277.472	188	256.356	188	250.341
189	278.377	189	276.622	189	256.197	189	250.207
190	278.244	190	275.766	190	256.118	190	250.146
191	278.177	191	274.852	191	256.162	191	250.12
192	277.963	192	273.966	192	256.167	192	250.047
193	277.76	193	273.079	193	256.112	193	249.807
194	277.599	194	272.227	194	255.963	194	249.62
195	277.516	195	271.453	195	255.783	195	249.585
196	277.498	196	270.704	196	255.726	196	249.491
197	277.427	197	269.869	197	255.729	197	249.341
198	277.448	198	269.105	198	255.767	198	249.291
199	277.37	199	268.365	199	255.814	199	249.257
200	277.209	200	267.595	200	255.773	200	249.212
201	277.075	201	266.87	201	255.718	201	249.181
202	277.005	202	266.039	202	255.635	202	249.206
203	276.996	203	265.364	203	255.666	203	249.237
204	276.965	204	264.598	204	255.699	204	249.192
205	276.897	205	263.83	205	255.558	205	249.143
206	276.761	206	263.23	206	255.324	206	249.083
207	276.627	207	262.663	207	255.103	207	249.111
208	276.523	208	262.069	208	255.06	208	249.029
209	276.476	209	261.506	209	255.155	209	248.917
210	276.433	210	261.024	210	255.154	210	248.827
211	276.318	211	260.528	211	255.052	211	248.771
212	276.202	212	259.974	212	255.044	212	248.838
213	276.158	213	259.436	213	254.977	213	248.828
214	276.132	214	259.035	214	254.866	214	248.755
215	276.05	215	258.627	215	254.812	215	248.705
216	275.874	216	258.222	216	254.857	216	248.721
217	275.688	217	257.774	217	254.881	217	248.795
218	275.54	218	257.347	218	254.89	218	248.883
219	275.491	219	256.971	219	254.901	219	248.903
220	275.521	220	256.605	220	254.848	220	248.848
221	275.6	221	256.161	221	254.852	221	248.803
222	275.618	222	255.683	222	254.879	222	248.75
223	275.487	223	255.331	223	254.769	223	248.723
224	275.498	224	255.021	224	254.795	224	248.764
225	275.422	225	254.71	225	254.867	225	248.792
226	275.302	226	254.4	226	254.815	226	248.794
227	275.244	227	253.98	227	254.735	227	248.841
228	275.193	228	253.569	228	254.655	228	248.819
229	275.252	229	253.298	229	254.538	229	248.765
230	275.165	230	253.024	230	254.425	230	248.744
231	274.945	231	252.728	231	254.421	231	248.74
232	274.861	232	252.546	232	254.441	232	248.638
233	274.887	233	252.257	233	254.412	233	248.618
234	274.743	234	252.068	234	254.383	234	248.628
235	274.691	235	251.93	235	254.322	235	248.656
236	274.772	236	251.744	236	254.18	236	248.648
237	274.89	237	251.549	237	254.15	237	248.665
238	274.916	238	251.385	238	254.158	238	248.719
239	274.904	239	251.238	239	254.198	239	248.626
240	274.817	240	251.053	240	254.171	240	248.491
241	274.612	241	250.946	241	254.074	241	248.486
		242	250.776	242	254.024	242	248.562
		243	250.541	243	253.998	243	248.606
		244	250.366	244	254.075	244	248.61
		245	250.274	245	254.138	245	248.647
		246	250.311	246	254.109	246	248.649
		247	250.274	247	254.153	247	248.53
		248	250.152	248	254.205	248	248.456
		249	250.093	249	254.205	249	248.523
		250	249.959	250	254.232	250	248.551
		251	249.911	251	254.378	251	248.56
		252	249.856	252	254.491	252	248.66
		253	249.728	253	254.544	253	248.648
		254	249.467	254	254.539	254	248.598
		255	249.271	255	254.444	255	248.565
		256	249.134	256	254.47	256	248.616
		257	249.06	257	254.39	257	248.697
		258	249.045	258	254.185	258	248.763
		259	249.004	259	254.021	259	248.81
		260	248.901	260	254.113	260	248.861
		261	248.81	261	254.258	261	248.873
		262	248.716	262	254.275	262	248.776
		263	248.607	263	254.174	263	248.727
		264	248.51	264	254.123	264	248.699
		265	248.541	265	254.089	265	248.735
		266	248.614	266	253.99	266	248.77
		267	248.568	267	253.925	267	248.79
		268	248.438	268	253.904	268	248.722
		269	248.331	269	253.905	269	248.687
		270	248.285	270	253.875	270	248.742
		271	248.331	271	253.855	271	248.807
		272	248.415	272	253.932	272	248.883
		273	248.517	273	253.987	273	248.925
		274	248.454	274	253.89	274	248.913
		275	248.378	275	253.89	275	248.898
		276	248.345	276	254.027	276	248.975
		277	248.399	277	254.162	277	249.054
		278	248.345	278	254.242	278	249.049
		279	248.183	279	254.317	279	249.067
		280	248.104	280	254.299	280	249.119
		281	248.11	281	254.232	281	249.189
		282	248.161	282	254.098	282	249.118
		283	248.18	283	253.981	283	249.004
		284	248.159	284	253.988	284	248.941
		285	248.048	285	254.027	285	248.983
		286	247.895	286	254.143	286	249.087
		287	247.778	287	254.288	287	249.12
		288	247.665	288	254.383	288	249.097
		289	247.661	289	254.418	289	249.108
		290	247.711	290	254.319	290	249.12
		291	247.675	291	254.216	291	249.118
		292	247.643	292	254.212	292	249.079
		293	247.627	293	254.235	293	249.02
		294	247.618	294	254.258	294	248.918
		295	247.599	295	254.272	295	248.877
		296	247.587	296	254.177	296	248.977
		297	247.569	297	254.099	297	249.025
		298	247.604	298	254.075	298	249.044
		299	247.697	299	254.018	299	249.115
		300	247.627	300	254.016	300	249.206
		301	247.549	301	253.976	301	249.182
		302	247.599	302	254.015	302	249.178
		303	247.611	303	254.16	303	249.145
		304	247.568	304	254.373	304	249.114
		305	247.604	305	254.467	305	249.163
		306	247.553	306	254.428	306	249.171
		307	247.616	307	254.495	307	249.111
		308	247.635	308	254.599	308	249.055
		309	247.55	309	254.643	309	249.113
		310	247.463	310	254.578	310	249.174
		311	247.382	311	254.517	311	249.22
		312	247.375	312	254.448	312	249.257
		313	247.391	313	254.355	313	249.285
		314	247.34	314	254.284	314	249.3
		315	247.292			315	249.336
		316	247.189			316	249.359
		317	247.147			317	249.375
		318	247.147			318	249.296
		319	247.22			319	249.283
		320	247.199			320	249.394
		321	247.046			321	249.491
		322	247.068			322	249.562
		323	247.064			323	249.504
		324	247.078			324	249.494
		325	247.045			325	249.515
		326	247.1			326	249.59
		327	247.181			327	249.725
		328	247.146			328	249.828
		329	247.099			329	249.968
		330	247.093			330	250.054
		331	247.1			331	249.984
		332	247.19			332	249.876
		333	247.253			333	249.834
		334	247.163			334	249.88
		335	247.078			335	249.967
		336	247.177			336	249.961
		337	247.323			337	249.945
		338	247.418			338	249.904
		339	247.332			339	249.821
		340	247.24			340	249.801
		341	247.356			341	249.865
		342	247.471			342	249.926
		343	247.468			343	249.935
		344	247.353			344	249.949
		345	247.254			345	249.941
		346	247.241			346	249.912
		347	247.231			347	249.94
		348	247.303			348	250.01
		349	247.288			349	250.026
		350	247.314			350	249.977
		351	247.359			351	249.904
		352	247.399			352	249.901
		353	247.359			353	249.984
		354	247.278			354	250.129
		355	247.248			355	250.19
		356	247.267			356	250.261
		357	247.237			357	250.282
		358	247.122			358	250.269
		359	247.124
		360	247.219
		361	247.234
		362	247.208
