# Supplementary material for: Structure of Mycobacterium tuberculosis cytochrome bcc in complex with Q203 and TB47, two anti-TB drug candidates
Source: eLife. 2021 Nov 25;10:e69418. doi: 10.7554/eLife.69418 (PMC8616580; doi:10.7554/eLife.69418)
Supplement: Figure 6—figure supplement 2—source data 1. [file elife-69418-fig6-figsupp2-data1.xlsx]

## Sheet: Inhibitor RMSD
Time(ns)	WT	T313A	E314Y	T313A+E314Y
0.1	1.0756	1.252	1.5467	1.9677
0.2	1.3454	1.0527	1.5511	2.142
0.3	0.991	1.0684	1.5213	1.7665
0.4	1.3555	1.4997	1.6315	1.9434
0.5	1.4162	1.1401	1.8114	1.8613
0.6	1.2245	1.2179	1.8732	1.4078
0.7	1.5698	1.1437	1.5055	1.7047
0.8	1.4136	1.6583	1.4968	1.64
0.9	1.539	1.3651	1.5558	2.0929
1	1.5344	1.372	1.6953	1.6694
1.1	1.4977	1.5537	1.709	1.9671
1.2	1.4948	1.3581	1.6647	1.9468
1.3	1.9327	1.3341	1.3727	1.8313
1.4	1.3492	1.2648	1.592	1.5343
1.5	1.4291	1.3466	1.4932	1.7737
1.6	1.2459	1.5825	1.3836	1.8406
1.7	1.4517	1.316	1.6649	2.4229
1.8	1.2565	1.4117	1.5205	2.3288
1.9	1.4218	1.6518	1.5595	2.0555
2	1.545	1.0848	1.5806	2.3286
2.1	1.5004	1.342	1.5168	1.8749
2.2	1.4319	1.317	1.5212	2.0609
2.3	1.2026	1.2802	2.0228	2.3292
2.4	1.6164	1.1674	1.6594	2.2018
2.5	1.4084	1.1438	1.6183	2.1221
2.6	1.5436	1.4523	1.729	2.0199
2.7	1.5531	1.0484	1.9307	2.0483
2.8	1.5384	1.1308	2.4116	1.8101
2.9	1.3673	1.2237	1.8239	2.0127
3	1.5346	1.1264	1.8089	2.0764
3.1	1.3614	1.5161	1.7908	1.9657
3.2	1.2929	1.469	1.9403	1.9916
3.3	1.4503	1.4241	1.7811	1.88
3.4	1.3671	1.7318	1.7374	1.8515
3.5	1.1441	1.3264	1.6074	1.5367
3.6	1.1209	1.3715	1.5655	1.9523
3.7	1.1442	1.5052	1.4297	1.9881
3.8	1.2738	1.1222	1.594	1.6901
3.9	1.1826	1.5471	1.6113	1.4609
4	1.3934	1.0202	1.6858	1.3247
4.1	1.5363	1.2251	1.6554	1.6244
4.2	1.2562	1.1808	1.5445	1.8136
4.3	1.1415	1.0252	1.777	1.6679
4.4	1.5109	1.1861	1.6936	2.2854
4.5	1.3786	1.177	1.7973	1.9474
4.6	1.5788	1.3619	1.701	2.0853
4.7	1.406	0.91	1.472	2.0083
4.8	1.3448	1.0076	1.4465	2.3606
4.9	1.0114	1.1396	1.6399	2.2342
5	1.2525	0.8342	1.7232	2.393
5.1	1.359	1.2196	1.4547	1.8494
5.2	1.1319	1.167	1.9236	1.8745
5.3	1.3451	0.8319	1.6441	1.74
5.4	1.1885	0.8645	1.7846	2.0231
5.5	1.0569	1.0549	1.4467	2.1471
5.6	1.2251	1.1319	1.5496	2.4297
5.7	1.3203	1.2691	1.2817	2.3856
5.8	1.1901	1.4439	1.6655	1.7664
5.9	1.1432	1.3301	1.5114	1.3026
6	1.4122	1.3013	1.7515	1.6889
6.1	1.305	1.2356	1.5399	1.4207
6.2	1.3651	1.3256	1.8343	1.7027
6.3	1.1383	1.3275	1.6809	1.6196
6.4	1.1314	1.3364	1.5432	1.9688
6.5	1.3031	1.5048	1.2402	2.249
6.6	0.7029	1.3882	1.6536	1.8325
6.7	1.2815	1.3684	1.5847	1.8882
6.8	1.1756	1.3647	1.5286	1.8181
6.9	1.426	1.3675	1.604	1.7749
7	1.129	1.3657	1.5502	1.8307
7.1	1.1802	1.3988	1.5321	1.8039
7.2	1.1127	1.2649	1.3238	1.5949
7.3	1.3048	1.3151	1.4586	1.7923
7.4	0.9895	1.0501	1.5609	1.5933
7.5	1.0222	1.1726	1.505	1.6287
7.6	1.3506	1.3353	1.4839	1.6003
7.7	1.1395	1.1763	1.4386	1.3393
7.8	1.27	1.0505	1.4079	1.5086
7.9	1.3786	1.3202	1.4592	1.4319
8	1.5275	1.1978	1.2642	1.9423
8.1	1.4186	1.0462	1.221	1.9426
8.2	1.3123	1.2535	1.3734	2.0749
8.3	1.3529	1.806	1.3182	1.8636
8.4	0.8546	1.6976	1.5426	2.2102
8.5	1.1464	1.1313	1.2538	2.0087
8.6	1.4116	1.2271	1.1692	1.8409
8.7	1.5138	1.2237	1.2294	1.8567
8.8	1.0454	1.2202	1.102	1.3948
8.9	1.3984	1.3171	1.3779	1.773
9	1.1293	1.2834	1.4055	1.7681
9.1	1.3724	1.0466	1.3536	1.8081
9.2	1.2765	1.319	1.3569	1.722
9.3	1.2049	1.4082	1.4543	1.5664
9.4	1.1878	1.2674	1.6054	1.7389
9.5	1.4221	1.2598	1.3246	1.6713
9.6	1.0677	1.2981	1.263	1.7709
9.7	1.0463	1.4221	1.3246	1.7436
9.8	1.205	1.4201	1.4831	1.804
9.9	1.2815	1.2535	1.5944	1.8903
10	1.2167	1.5322	1.4202	1.8461
10.1	0.9648	1.3437	1.2799	1.9955
10.2	1.251	1.5301	1.1319	2.1204
10.3	1.2891	1.3447	1.5077	2.0213
10.4	1.3605	1.5649	1.6002	2.2258
10.5	1.3322	1.5254	1.4164	2.0864
10.6	1.2488	1.51	1.3539	2.2074
10.7	1.3329	1.2386	1.6771	2.5146
10.8	1.272	1.6746	1.4399	2.3261
10.9	1.2906	1.3422	1.334	2.0464
11	1.2031	1.5368	1.7101	2.1588
11.1	1.2139	1.7754	1.4294	2.043
11.2	1.1041	1.9957	1.5185	2.125
11.3	1.1621	2.3731	1.2982	2.0486
11.4	1.2205	2.2087	1.4523	2.0838
11.5	0.982	2.2458	1.3277	2.1384
11.6	1.0443	1.7572	1.8267	2.0603
11.7	1.166	1.9348	1.6584	2.2215
11.8	1.1589	1.9137	1.4573	2.3786
11.9	1.201	1.8498	1.1503	2.5438
12	0.9717	2.0591	1.1522	2.1424
12.1	1.349	1.8645	1.2267	2.2589
12.2	1.2982	1.881	1.0826	1.7429
12.3	1.8842	1.8149	1.2558	1.9205
12.4	1.8109	1.9872	1.2525	1.6819
12.5	1.0322	1.759	1.2172	1.9768
12.6	1.2466	2.2624	1.2048	1.9674
12.7	0.8199	1.5542	1.2142	1.8169
12.8	1.2441	2.0344	1.4341	2.3142
12.9	1.1248	2.2769	1.5601	2.3145
13	1.4886	2.2528	1.4679	2.1861
13.1	1.4647	2.1837	1.7056	2.6172
13.2	1.5621	2.3878	1.3774	2.2833
13.3	1.4976	2.4152	1.5714	2.2266
13.4	1.6643	2.5722	1.3053	2.2794
13.5	1.3321	2.3716	1.1352	2.606
13.6	1.2471	2.107	1.2388	2.609
13.7	1.4445	2.5448	1.4379	2.6375
13.8	1.2846	2.6426	1.4047	2.7972
13.9	1.1945	2.419	1.4371	2.814
14	1.1582	2.3588	1.5304	2.3829
14.1	1.3581	2.272	1.5552	2.4857
14.2	1.2565	2.22	1.5598	2.7143
14.3	1.4899	2.3911	1.2677	3.0093
14.4	0.8937	2.2448	1.308	2.5453
14.5	1.1723	2.1267	1.3123	2.5023
14.6	1.1501	2.5251	1.4746	2.6068
14.7	1.38	2.5285	1.0558	2.5237
14.8	1.2393	2.231	1.2622	2.6656
14.9	1.6497	2.3754	1.9294	2.5627
15	1.2795	2.463	2.0635	2.3944
15.1	1.1838	2.2521	1.35	2.2708
15.2	1.5302	2.5346	1.2295	2.6366
15.3	1.3073	2.3543	1.2436	2.557
15.4	1.3222	2.2853	1.3085	2.3926
15.5	1.3787	2.3351	1.0702	2.5458
15.6	1.3687	2.2217	1.1675	2.5603
15.7	1.5228	2.334	1.2671	2.6847
15.8	1.3402	2.9347	1.1303	2.7261
15.9	1.0984	2.4571	1.0661	2.6671
16	1.1821	2.6135	1.2713	2.578
16.1	1.7327	2.432	1.0993	2.5365
16.2	1.2619	2.3794	1.0585	2.5757
16.3	1.7138	2.2904	1.3347	2.9249
16.4	1.63	2.5123	1.0652	2.7378
16.5	1.8567	1.7867	1.1164	2.7065
16.6	1.6711	1.6752	1.326	2.9693
16.7	1.8305	2.4855	1.3814	2.7477
16.8	1.6111	2.0353	1.6171	2.0569
16.9	1.6588	1.9514	1.1946	2.7969
17	1.5231	2.0892	1.2426	2.8486
17.1	1.2117	1.6809	1.1561	2.781
17.2	1.3113	1.9775	1.1952	2.5019
17.3	1.1261	2.2916	0.9777	2.6201
17.4	1.186	2.5399	1.306	2.9668
17.5	1.2852	2.7249	1.3042	2.873
17.6	1.2913	2.4423	1.4459	2.8351
17.7	1.3513	2.3125	1.2781	2.7146
17.8	1.3523	2.4168	1.3718	2.4877
17.9	1.0536	2.2577	1.1805	2.2205
18	1.1388	2.131	0.9124	2.7308
18.1	1.374	2.5282	1.0344	2.693
18.2	1.4466	2.373	1.2417	1.7701
18.3	1.097	2.602	1.2457	1.9165
18.4	1.292	2.1167	1.1377	2.0721
18.5	1.2831	2.6317	1.181	2.2431
18.6	1.4229	2.3308	1.1132	2.1694
18.7	1.4236	2.4915	1.0244	1.6894
18.8	1.4108	2.6474	1.1818	1.6715
18.9	1.5574	2.4194	1.0592	2.247
19	1.2958	2.5155	1.5469	1.5174
19.1	1.5254	2.2016	1.5608	2.4513
19.2	1.6705	2.3822	1.6891	2.3916
19.3	1.3664	2.4805	1.5031	2.3616
19.4	1.3483	2.6316	1.5906	2.1074
19.5	1.2493	2.3579	1.6179	2.262
19.6	1.3432	2.4857	1.5438	2.1005
19.7	1.2762	2.8791	1.7581	2.3099
19.8	1.2676	2.9044	1.5958	1.7826
19.9	1.3113	2.8194	1.7862	2.0743
20	0.9461	2.3411	1.4609	1.9779
20.1	1.2037	1.6788	1.5645	1.7653
20.2	1.4271	2.4336	1.2135	1.82
20.3	1.4151	2.2773	1.3334	1.9699
20.4	1.269	2.5036	1.3976	2.0212
20.5	1.2725	2.4656	1.3548	2.0509
20.6	1.4352	2.5665	1.253	1.9388
20.7	1.4448	2.2828	1.704	1.7047
20.8	1.3433	2.2906	1.5749	2.0831
20.9	1.3569	2.114	1.5199	2.1402
21	1.3845	2.2008	1.5646	2.2917
21.1	1.2965	2.0406	1.5566	2.2782
21.2	1.6133	2.0361	1.3886	2.1374
21.3	1.3448	2.3139	1.6069	1.8445
21.4	1.4595	1.9258	1.6249	2.2509
21.5	1.3944	2.1669	1.7281	2.1952
21.6	1.3989	1.9802	1.9937	2.278
21.7	1.3861	2.3947	1.3368	2.0448
21.8	1.4617	2.454	1.6154	2.1514
21.9	1.3854	2.3545	1.7129	1.9781
22	1.3874	2.3904	1.7734	2.7097
22.1	1.328	2.157	1.7806	2.7023
22.2	1.3108	2.5542	1.8366	2.8201
22.3	1.2981	2.1829	1.9077	2.8692
22.4	1.2899	2.0279	2.0048	2.7644
22.5	1.2023	2.2326	1.8191	2.6582
22.6	1.282	2.3012	1.8369	2.5568
22.7	1.12	2.0468	1.7283	2.7019
22.8	1.2522	1.9658	1.6774	2.6172
22.9	0.9314	2.2389	1.5258	2.5388
23	1.2391	1.7857	1.666	2.3543
23.1	1.2495	1.3127	1.7205	2.5707
23.2	1.2702	1.6796	1.6125	2.5585
23.3	1.1164	1.6097	1.8588	1.9457
23.4	0.9692	1.8431	1.8977	2.398
23.5	0.9965	1.6223	1.6568	2.6205
23.6	0.9417	1.5526	1.8195	2.0628
23.7	0.9669	1.4781	1.7004	2.3601
23.8	0.9945	1.8201	1.8627	2.7529
23.9	1.0898	1.5421	1.8791	2.4545
24	1.1288	1.3781	1.6678	2.5589
24.1	1.2095	1.4592	1.8711	2.5294
24.2	1.2728	1.3512	1.8904	2.4813
24.3	1.1729	1.4115	1.7213	2.2579
24.4	1.2184	1.3845	1.9413	2.6888
24.5	1.1556	1.1932	1.8427	2.6587
24.6	1.0687	1.3168	1.6467	2.9378
24.7	1.0955	1.0679	1.5815	2.839
24.8	1.35	1.5832	1.7269	2.3494
24.9	1.1664	1.2695	1.799	2.7431
25	1.2022	1.6311	1.5846	2.7745
25.1	1.3432	1.4753	1.7457	2.6998
25.2	0.9542	1.397	1.6553	2.5099
25.3	1.0193	1.3808	1.5251	2.6425
25.4	0.8925	1.4003	1.8828	2.7205
25.5	1.0426	1.2621	1.6225	2.1651
25.6	1.0959	1.2531	1.7239	2.3121
25.7	0.8372	1.1098	1.8151	2.2676
25.8	1.161	1.2942	1.6707	2.0519
25.9	0.8881	1.9029	1.3745	2.6616
26	0.9643	1.2198	1.5931	2.7445
26.1	1.098	1.4583	1.7636	3.3685
26.2	0.9968	1.4293	1.6778	3.1142
26.3	1.196	1.3176	1.6263	2.9543
26.4	1.1466	1.1876	1.719	2.7985
26.5	1.1693	1.1731	1.4117	2.8715
26.6	1.3373	1.3065	1.9699	2.7573
26.7	1.2765	1.2353	1.7933	3.0364
26.8	1.1604	1.2558	1.8285	2.6327
26.9	0.9879	1.4278	2.1637	2.6988
27	0.9465	1.3728	1.2993	2.7287
27.1	1.2559	1.1986	1.9348	2.441
27.2	1.1109	1.1628	1.8507	3.031
27.3	1.1416	1.3514	1.6596	2.1331
27.4	0.9048	1.039	1.6064	1.7857
27.5	1.0527	1.2434	1.7339	1.8524
27.6	0.8635	1.082	1.8429	1.503
27.7	1.0587	1.417	1.7556	1.9083
27.8	1.1301	1.5281	1.8752	1.6253
27.9	1.0983	1.4454	1.9788	1.566
28	1.1338	1.2784	1.7797	1.322
28.1	1.188	1.5637	1.7432	1.6963
28.2	1.1378	1.4867	1.8689	1.4979
28.3	1.1069	1.3391	1.8031	1.7501
28.4	0.8882	1.4013	2.1343	1.6143
28.5	0.8056	1.3235	2.1707	1.8797
28.6	0.9771	1.4417	2.1424	1.953
28.7	1.112	1.4172	2.1938	1.9889
28.8	0.9934	1.4908	2.0882	1.9559
28.9	0.8612	1.5574	1.7771	2.2525
29	0.9839	1.415	0.8955	2.0011
29.1	1.0341	1.3444	1.238	2.0711
29.2	0.9704	1.4003	1.1853	1.5961
29.3	0.9594	1.405	1.1349	1.6802
29.4	1.179	1.3906	1.4253	2.2803
29.5	1.2293	1.3394	1.6903	1.7928
29.6	1.2463	1.2104	1.2217	2.084
29.7	1.5539	1.1024	1.0917	1.4479
29.8	1.3831	1.3385	1.0438	1.9499
29.9	1.9914	1.1762	1.286	1.936
30	1.4248	1.2033	1.1853	1.8132
30.1	2.0562	1.664	0.9804	1.4304
30.2	1.8952	1.5793	1.6284	1.5939
30.3	1.7908	1.4898	1.1864	1.4151
30.4	1.7274	1.474	1.4504	1.6457
30.5	1.9443	1.7677	1.2275	1.567
30.6	1.836	1.6918	1.0571	1.7299
30.7	1.7517	1.7039	0.9233	1.7084
30.8	1.5161	1.4921	0.9835	1.6806
30.9	1.8338	1.2852	1.2385	1.5035
31	1.5109	1.3035	1.2862	1.6592
31.1	1.8091	1.185	1.7422	1.2881
31.2	1.9037	1.1828	1.5761	1.5488
31.3	1.7668	1.1773	1.4275	1.6716
31.4	1.6943	1.0509	1.2118	1.6102
31.5	1.7473	1.1009	1.245	1.4727
31.6	1.7681	1.1064	1.3441	1.7097
31.7	1.841	1.1372	1.0206	1.4337
31.8	1.8057	1.1921	1.1829	1.6005
31.9	1.368	1.0026	1.3436	2.1285
32	1.8363	1.0232	1.3856	1.812
32.1	1.6654	1.141	1.2519	2.0756
32.2	1.563	1.1157	1.4301	2.5075
32.3	1.4704	1.0833	1.4967	2.341
32.4	1.3402	1.1251	1.3941	1.7898
32.5	1.3679	1.3663	1.2781	1.8118
32.6	1.4515	1.372	0.9848	1.6702
32.7	1.5344	1.6135	0.9198	1.9362
32.8	1.5486	1.2394	1.1173	1.7535
32.9	1.8168	1.2327	1.2959	1.8729
33	1.4296	1.4485	1.1807	1.7368
33.1	1.9408	1.3434	1.4577	1.7648
33.2	1.6099	1.2884	1.2549	1.7518
33.3	1.2955	1.345	1.2305	1.5829
33.4	1.5598	1.6498	1.4107	1.7398
33.5	1.3465	1.3375	1.0072	1.4938
33.6	1.7806	1.4948	1.0638	1.52
33.7	1.8459	1.4422	1.6224	1.4957
33.8	1.4742	1.6391	1.8104	1.6
33.9	1.8314	1.3737	1.9376	1.5476
34	1.657	1.4085	1.6627	1.5231
34.1	1.4044	1.1346	1.695	1.326
34.2	1.9921	1.2027	2.0072	1.3008
34.3	1.7063	1.2324	1.8481	1.4255
34.4	2.0986	1.1825	1.9767	1.4747
34.5	1.9027	1.1124	1.7381	1.3895
34.6	1.8317	1.1531	1.3975	1.366
34.7	1.444	1.2751	1.2772	1.3851
34.8	1.7951	1.2426	1.2187	1.3792
34.9	1.3719	1.2692	1.1579	1.476
35	2.1901	1.2	1.0633	1.423
35.1	2.3059	1.2974	1.2767	1.4813
35.2	2.0072	1.1106	1.3892	1.5717
35.3	2.16	1.2678	1.7803	1.4723
35.4	1.9368	1.2577	1.811	1.0349
35.5	1.8072	1.2945	1.4136	1.1065
35.6	2.0262	1.1012	1.6402	1.2919
35.7	1.5136	1.1183	1.4573	1.4448
35.8	1.5457	1.1177	1.7961	1.4469
35.9	1.8682	1.2856	1.9218	1.3042
36	1.4982	1.3753	1.6974	1.4742
36.1	1.5913	1.2504	1.748	1.5457
36.2	1.696	1.2901	1.7375	1.2624
36.3	1.6198	1.3882	1.7315	1.2806
36.4	1.9061	1.1106	1.7063	1.4027
36.5	1.6413	1.1157	1.6143	1.2117
36.6	1.5934	1.0933	1.7923	1.1047
36.7	1.628	1.1325	1.8156	1.3529
36.8	1.5995	1.1593	1.8714	1.4026
36.9	1.4403	1.1724	1.6765	1.3051
37	1.7649	1.3187	1.6915	1.2689
37.1	1.654	1.0878	1.7441	1.335
37.2	1.7069	1.0892	1.6047	1.45
37.3	1.5218	1.4111	1.5026	1.291
37.4	1.9146	1.0425	1.7746	1.0694
37.5	1.3437	1.1847	1.8607	1.2259
37.6	1.2734	1.1248	1.5437	1.2476
37.7	1.8219	1.0441	1.9172	1.2418
37.8	1.5698	0.9775	1.6634	1.5227
37.9	1.4882	1.1666	1.775	1.4251
38	1.606	1.1083	1.587	1.2814
38.1	1.532	1.1154	1.6132	1.1243
38.2	1.5484	1.0015	1.9018	1.3688
38.3	1.4826	1.1027	1.8304	1.3006
38.4	1.5756	1.0044	1.8694	1.3244
38.5	2.0722	1.0532	1.872	1.3767
38.6	1.7774	0.8706	1.7455	1.3803
38.7	1.8976	1.0552	1.5132	1.4565
38.8	1.5269	1.0943	1.719	1.3424
38.9	1.7413	1.0382	1.71	1.1988
39	1.5468	1.1486	1.6814	1.1658
39.1	1.3772	1.1548	1.7718	1.3409
39.2	1.4787	1.0328	1.6389	1.287
39.3	1.5526	1.1016	1.3856	1.2072
39.4	1.8386	1.0586	1.5338	1.1988
39.5	1.7846	1.0069	1.5415	1.1893
39.6	1.527	0.9797	1.5399	1.2439
39.7	1.3183	0.995	1.4139	1.222
39.8	1.9411	1.0555	1.4561	1.2647
39.9	1.6343	0.9853	1.7501	1.2285
40	1.7216	1.1605	1.5996	1.1316
40.1	1.7815	0.9561	1.5196	1.4502
40.2	1.8554	1.1114	1.436	1.225
40.3	2.0334	1.011	1.4348	1.4199
40.4	2.0204	1.1479	1.3539	1.5744
40.5	1.8653	1.047	1.4359	1.0834
40.6	1.241	1.079	1.6187	1.5693
40.7	1.6009	0.9653	1.5209	1.4162
40.8	1.9328	1.1542	1.6217	1.4014
40.9	1.9302	1.001	1.5229	1.1049
41	1.7933	1.2044	1.8697	1.3645
41.1	1.2527	1.0104	1.5522	1.0956
41.2	1.7291	0.8719	1.3727	1.3502
41.3	1.481	0.8963	1.5334	1.4345
41.4	1.3225	0.7606	1.3616	1.5148
41.5	1.5317	0.925	1.6721	1.4689
41.6	1.6866	1.0049	1.755	1.4632
41.7	1.3923	1.2381	1.375	1.5344
41.8	1.6643	1.2863	1.5084	1.2201
41.9	1.5585	1.2524	1.7492	1.3052
42	1.6473	1.2822	1.6008	1.3328
42.1	1.5869	1.2828	1.3954	1.3143
42.2	1.7953	1.2145	1.2828	1.3412
42.3	1.5724	1.3001	1.5092	1.3846
42.4	1.7615	1.4774	1.3671	1.3188
42.5	1.7541	1.3396	1.4504	1.258
42.6	1.5796	1.5345	1.5056	1.1119
42.7	2.0494	1.4029	1.4403	1.4199
42.8	1.6544	1.31	1.3628	1.2096
42.9	1.4977	1.2738	1.4377	1.3302
43	1.4583	1.324	1.4882	1.2312
43.1	1.3572	1.3393	1.3243	1.3542
43.2	1.6069	1.19	1.483	1.3522
43.3	1.4476	1.3528	1.7154	1.2493
43.4	1.4364	1.3811	1.6573	1.1065
43.5	1.1909	1.3421	1.9051	1.43
43.6	1.6414	1.4389	2.0094	1.3618
43.7	1.416	1.4033	2.0016	1.4078
43.8	1.7106	1.3594	1.9934	1.3191
43.9	1.801	1.4703	1.8687	1.3857
44	1.4927	1.4543	1.7602	1.2931
44.1	1.2847	1.3158	1.7934	1.2733
44.2	1.477	1.4454	2.004	1.2569
44.3	1.4683	1.318	1.5497	1.2792
44.4	1.5144	1.3168	1.8528	1.3998
44.5	1.5016	1.3531	1.7791	1.4632
44.6	1.5479	1.3941	1.7389	1.4227
44.7	1.6741	1.1944	1.8857	1.3957
44.8	1.8191	1.3308	1.6887	1.4244
44.9	1.5444	1.8662	1.5792	1.6499
45	1.8891	1.0772	1.7862	1.4656
45.1	1.5199	1.0163	1.8845	1.6285
45.2	1.6218	1.0543	1.7893	1.2061
45.3	1.854	0.9597	1.7224	1.3834
45.4	2.0789	0.9562	1.8093	1.3823
45.5	1.5577	0.9301	1.8256	1.5875
45.6	1.5605	1.0023	1.7618	1.48
45.7	1.5525	0.8748	1.7774	1.4669
45.8	1.1843	0.7867	1.6397	1.5236
45.9	1.7776	1.1249	1.6714	1.216
46	1.4197	0.9323	1.7957	1.8601
46.1	1.2616	1.0548	1.655	1.7312
46.2	1.6735	1.3271	1.8041	1.6594
46.3	2.0177	1.1919	1.6463	1.618
46.4	1.8326	1.0705	1.8243	1.653
46.5	1.4776	1.0658	1.8173	1.4692
46.6	1.5545	0.8279	1.7463	1.3278
46.7	1.3408	1.0263	1.7534	1.6908
46.8	1.6149	0.8367	2.0085	1.5806
46.9	1.2326	1.0295	1.8553	1.4018
47	1.1924	1.0044	1.9682	1.8112
47.1	1.6234	0.978	1.9704	1.6843
47.2	1.3096	0.9648	1.545	1.7146
47.3	1.4785	1.1747	1.8106	1.5089
47.4	1.578	1.3437	1.9308	1.5636
47.5	1.9049	1.211	1.9725	1.6056
47.6	1.9462	1.4897	1.8466	1.7223
47.7	1.7385	1.5713	1.8815	1.5782
47.8	1.6934	0.9954	1.7063	1.4251
47.9	1.6842	1.45	1.6102	1.034
48	1.6054	1.0185	1.6549	1.2348
48.1	1.767	1.1522	1.7219	1.203
48.2	1.9378	1.143	2.0268	1.1383
48.3	1.8623	0.9756	1.9589	1.4678
48.4	1.5857	0.9326	1.7881	1.3307
48.5	1.8799	1.0291	1.7209	1.3713
48.6	1.9142	1.1492	1.8043	1.4639
48.7	1.751	0.8048	1.6084	1.2782
48.8	1.8192	0.9196	1.8195	1.4276
48.9	1.6186	1.1675	1.7544	1.312
49	1.4973	1.0749	1.7079	1.4518
49.1	1.6223	1.3571	1.7077	1.2879
49.2	1.472	1.179	1.5098	1.241
49.3	1.5394	1.1017	1.6572	1.153
49.4	1.4621	1.1573	1.7117	1.1154
49.5	1.7193	1.1455	1.7358	1.2111
49.6	1.6556	1.0824	1.6612	1.2964
49.7	1.9327	1.2325	1.7657	1.288
49.8	1.6253	1.1712	1.7552	1.4618
49.9	1.4799	1.1101	1.6211	1.4715
50	1.6029	1.2205	1.7628	1.5063
50.1	1.7497	1.2989	1.57	1.2566
50.2	1.588	1.1713	1.7154	2.1552
50.3	1.6416	1.1843	1.8796	1.5504
50.4	1.5854	1.1801	1.5864	1.4135
50.5	1.8296	1.2262	1.7873	1.3068
50.6	1.9231	1.1418	1.638	1.3557
50.7	1.2537	1.1757	1.7469	1.4136
50.8	1.1367	1.2909	1.699	1.5131
50.9	1.3938	1.2159	1.9511	1.6357
51	1.7117	1.3224	1.8214	1.6902
51.1	1.7745	1.1901	1.7848	1.4376
51.2	1.4293	1.2333	1.8659	1.2214
51.3	1.1213	1.354	2.0301	1.6356
51.4	1.5842	1.3252	1.8196	1.2988
51.5	1.202	1.2719	1.9167	1.2737
51.6	1.532	1.3192	1.7012	1.4049
51.7	1.4191	1.4955	1.5969	1.3797
51.8	1.4372	1.6811	1.8355	1.3938
51.9	1.2371	1.5337	1.7537	1.2083
52	1.3116	1.6888	1.7889	1.4944
52.1	1.1195	1.7003	1.929	1.4388
52.2	1.3715	1.3481	1.682	1.3455
52.3	1.4723	1.4226	1.891	1.3648
52.4	1.4224	1.3995	1.7227	1.4964
52.5	1.52	1.4299	2.4556	1.5587
52.6	1.6577	1.0784	1.9435	1.392
52.7	1.4544	1.0586	1.9337	1.3531
52.8	1.5281	1.1043	1.7962	1.3923
52.9	1.6222	1.3835	2.0096	1.5133
53	1.654	1.3014	1.7433	1.3171
53.1	1.6258	1.4045	1.8898	1.4031
53.2	1.4491	1.2725	1.892	1.3858
53.3	1.5695	1.1963	2.1147	1.4662
53.4	1.748	1.2847	1.9451	1.5329
53.5	1.3885	1.1465	1.991	1.4648
53.6	1.7228	1.144	1.8299	1.3103
53.7	1.1994	1.2076	1.7998	1.4598
53.8	1.3471	1.3183	1.9011	1.5702
53.9	1.3412	1.4351	1.9799	1.1211
54	1.3393	0.9853	1.8304	1.2575
54.1	1.3057	1.3916	1.834	1.2417
54.2	1.1946	1.0599	2.063	1.1084
54.3	1.3077	1.0209	1.7792	1.4548
54.4	1.5263	1.0335	1.6557	1.3024
54.5	1.4869	1.1303	1.7388	1.8264
54.6	1.3001	1.3167	1.8845	1.9208
54.7	1.4252	1.1529	1.7213	2.2074
54.8	1.2095	0.9817	2.0614	1.8084
54.9	1.173	1.0504	1.9849	1.5774
55	1.5046	1.2188	2.1063	1.5558
55.1	1.3617	1.3242	1.8697	1.4376
55.2	1.7756	1.5273	1.925	1.5428
55.3	1.4272	1.3473	1.618	1.1844
55.4	1.4863	1.5031	1.7966	1.4776
55.5	1.1374	1.3309	1.6666	1.1059
55.6	1.2702	1.4444	1.7182	1.0812
55.7	1.333	1.4119	1.9293	1.3385
55.8	1.3516	1.4821	1.75	1.925
55.9	1.1729	1.3869	1.7406	2.3555
56	1.2092	1.5633	1.6988	1.8576
56.1	1.2497	1.5117	1.5142	1.1837
56.2	1.2989	1.3052	1.4664	1.4589
56.3	1.3041	1.546	1.7385	1.5135
56.4	1.5282	1.414	1.584	1.5187
56.5	1.5005	1.4968	1.5503	1.6728
56.6	1.5856	1.3921	1.6856	1.3562
56.7	1.3692	1.3077	1.6145	1.2328
56.8	1.4497	1.382	1.918	1.3102
56.9	1.3688	1.3461	1.8145	1.143
57	1.6379	1.3119	1.8669	0.907
57.1	1.4906	1.2312	1.5329	1.0482
57.2	1.4039	1.3857	1.6009	1.5542
57.3	1.4272	1.3439	1.729	2.2484
57.4	1.448	1.3064	1.836	2.3804
57.5	1.4778	1.3135	1.9271	1.5694
57.6	1.3826	1.4693	2.0398	0.8246
57.7	1.6197	1.4614	1.8562	0.9789
57.8	1.5599	1.5987	1.6435	0.94
57.9	1.4527	1.4696	1.6146	1.118
58	1.4107	1.5422	1.769	1.3631
58.1	1.4312	1.5383	1.696	1.2045
58.2	1.3445	1.4136	1.747	1.273
58.3	1.4118	1.687	1.9089	1.1403
58.4	1.4569	1.4463	1.8319	1.3084
58.5	1.4132	1.3757	1.6564	1.4289
58.6	1.4322	1.5149	1.7292	1.3054
58.7	1.5408	1.4607	1.7279	1.2231
58.8	1.4423	1.886	1.7052	1.1349
58.9	1.3249	1.513	1.7733	1.2467
59	1.3923	1.5341	1.6535	1.1596
59.1	1.3354	1.5126	1.7367	1.4399
59.2	1.5645	1.5283	2.1883	1.1575
59.3	1.3471	1.6373	1.9539	1.0761
59.4	1.3832	1.4608	1.9694	1.0884
59.5	1.3355	1.4749	1.7556	1.0639
59.6	1.4582	1.4196	2.0031	0.8877
59.7	1.3355	1.5037	1.9716	0.8629
59.8	1.3872	1.173	1.9678	1.2526
59.9	1.5473	1.3076	1.9508	1.2132
60	1.5944	1.3436	1.962	1.1123
60.1	1.4846	1.2238	2.0391	1.1628
60.2	1.3232	1.2356	2.0952	1.2979
60.3	1.3795	1.2928	1.9122	1.2743
60.4	1.4529	1.3107	1.9062	0.9152
60.5	1.5713	1.3396	1.8013	1.2698
60.6	1.3631	1.4993	1.7051	0.9248
60.7	1.5629	1.3149	1.8829	1.3534
60.8	1.4394	1.2332	1.7905	1.3284
60.9	1.5007	1.1424	1.5831	1.1669
61	1.2483	1.2618	1.7572	1.0723
61.1	1.4266	1.3196	1.8322	1.3064
61.2	1.3882	1.3065	1.9557	1.2698
61.3	1.3809	1.3473	1.7877	1.2458
61.4	1.3479	1.4205	2.0032	1.1126
61.5	1.5968	1.212	1.907	0.9654
61.6	1.4541	1.2798	2.1989	0.9444
61.7	1.5134	1.2594	1.6381	0.8805
61.8	1.2521	1.4062	1.7772	0.9896
61.9	1.4421	1.4196	1.691	1.0533
62	1.4426	1.4008	1.9028	1.2231
62.1	1.3955	1.3275	1.7917	1.2919
62.2	1.4828	1.4646	1.7721	1.4338
62.3	1.4505	1.5259	1.7967	0.9769
62.4	1.4234	1.4197	1.6488	0.9134
62.5	1.3038	1.2004	1.6275	1.1297
62.6	1.4187	1.3616	1.4748	1.1221
62.7	1.4483	1.4953	1.4574	0.9228
62.8	1.5575	2.0872	1.8551	0.9961
62.9	1.4048	1.7739	1.5857	0.8679
63	1.4672	1.6817	2.094	0.9921
63.1	1.5397	1.9446	2.2946	0.9688
63.2	1.7013	1.8007	1.7801	0.9165
63.3	1.5722	2.1965	1.7989	0.8629
63.4	1.6012	2.2336	1.8747	0.9241
63.5	1.4929	1.7981	1.8552	0.9861
63.6	1.672	1.9501	1.8721	0.7812
63.7	1.5477	1.7536	1.6773	0.9803
63.8	1.5007	1.7177	1.9829	1.0013
63.9	1.4455	1.8183	1.9446	0.9731
64	1.2345	1.7293	1.9151	0.7645
64.1	1.2427	1.6557	1.858	1.0548
64.2	1.4155	1.8699	2.0157	0.9009
64.3	1.2394	1.7177	2.2507	1.104
64.4	1.5475	1.793	1.8255	0.9201
64.5	1.2605	1.8409	2.1362	0.8401
64.6	1.1474	1.5996	2.4634	1.0572
64.7	1.2611	1.6288	2.3979	0.8355
64.8	1.1957	1.7096	2.3035	0.9471
64.9	1.3502	1.5459	2.347	1.1282
65	1.1637	1.9627	2.2192	0.9625
65.1	1.6365	1.8538	2.38	0.8091
65.2	1.3121	1.7639	2.3578	0.863
65.3	1.1625	1.8468	2.3982	0.9602
65.4	1.2916	1.6134	2.2956	1.059
65.5	1.1015	1.4642	2.1973	1.0648
65.6	1.2781	1.2833	2.2153	1.1007
65.7	1.2228	1.6473	1.8894	1.1912
65.8	1.4157	1.4314	2.45	1.1564
65.9	1.3003	1.5054	2.1473	1.1666
66	1.518	1.7187	1.9317	1.277
66.1	1.4621	1.7959	2.0214	1.2364
66.2	1.4031	2.2476	2.1799	1.2907
66.3	1.2284	1.4893	1.9774	1.2459
66.4	1.6421	1.6174	2.3577	1.1727
66.5	1.2747	1.4549	2.3284	1.2822
66.6	1.5049	1.8649	2.3341	1.2402
66.7	1.4232	2.0891	2.1947	1.2755
66.8	1.4202	1.7471	2.1937	1.2544
66.9	1.2235	1.401	1.7731	1.2864
67	1.2623	1.59	1.9472	1.2199
67.1	1.2973	1.7574	1.7366	1.1651
67.2	1.2066	1.491	1.6226	1.2302
67.3	1.2289	1.5191	1.7457	1.122
67.4	1.1139	1.635	1.6915	1.1351
67.5	1.4004	1.6891	1.6697	1.1338
67.6	1.2284	1.4528	1.7715	1.1675
67.7	1.2339	1.4103	1.7829	1.1294
67.8	1.3864	1.2787	1.7235	1.116
67.9	1.3993	1.6873	1.5567	1.2287
68	1.3365	1.4263	1.6043	1.2222
68.1	1.238	1.5501	1.867	1.3145
68.2	1.1533	1.3204	1.8153	1.2906
68.3	1.0614	1.3644	1.7465	1.2628
68.4	1.2747	1.4262	1.8602	1.0789
68.5	1.2863	1.6652	1.7732	1.1628
68.6	1.2596	1.3751	1.7448	1.1283
68.7	1.2987	1.3948	1.4921	1.1655
68.8	1.3992	1.2185	1.57	1.3112
68.9	1.5608	1.3435	1.5316	1.1735
69	1.3813	1.2125	1.5425	1.2531
69.1	1.4991	1.2289	1.3502	1.1011
69.2	1.5941	1.2755	1.4324	1.1557
69.3	1.3616	1.2997	1.6598	1.0692
69.4	1.7918	1.296	1.4138	1.1955
69.5	1.459	1.2153	1.3898	1.098
69.6	1.5032	1.1935	1.7716	1.1392
69.7	1.4729	1.3969	1.4773	1.1617
69.8	1.3444	1.484	1.2835	1.1707
69.9	1.5078	1.2966	1.5015	0.9915
70	1.2781	1.6774	1.3125	1.0692
70.1	1.4894	1.6338	1.4143	1.0783
70.2	1.4302	1.1789	1.3203	1.1526
70.3	1.6282	1.4809	1.3505	1.1351
70.4	1.3269	1.4668	1.3653	1.2835
70.5	1.2631	1.5792	1.5066	1.1712
70.6	1.4755	1.2343	1.294	1.1893
70.7	1.2129	1.4768	1.5664	1.3254
70.8	1.3881	1.5695	1.5972	1.222
70.9	1.3687	1.5966	1.2554	1.6126
71	1.4302	1.5046	1.4125	1.6519
71.1	1.339	1.8935	1.578	1.3652
71.2	1.7841	1.6657	1.1669	1.4557
71.3	1.4304	1.7102	1.287	1.1009
71.4	1.3854	1.6464	1.2972	1.0654
71.5	1.2299	1.7044	1.3329	1.2688
71.6	1.494	1.2783	1.3789	1.1198
71.7	1.2247	1.3887	2.0359	1.1274
71.8	1.3886	1.9283	2.1905	1.0432
71.9	1.3918	1.9854	1.8946	1.0734
72	1.2163	1.7612	1.7704	1.3203
72.1	1.1341	1.6106	1.8357	1.1573
72.2	1.3703	1.9025	1.8883	1.3669
72.3	1.1555	1.6826	1.8917	1.2766
72.4	1.3277	1.6566	1.9935	1.2397
72.5	1.1531	1.6755	1.8794	1.2923
72.6	1.1565	1.5565	1.7998	1.348
72.7	1.2752	1.8138	1.9047	1.2093
72.8	1.0548	2.1745	1.8637	1.1674
72.9	1.2579	2.328	1.9795	1.2849
73	1.3231	2.4114	1.6584	1.2498
73.1	1.1267	1.733	1.8775	1.3011
73.2	1.0599	1.6107	1.6157	1.427
73.3	1.0028	1.6598	1.864	0.9455
73.4	1.4568	1.7725	1.8797	1.2675
73.5	1.2274	1.7042	1.8791	1.1489
73.6	1.0527	1.6631	1.7295	0.9918
73.7	1.138	1.6636	2.0302	1.1229
73.8	1.1789	1.6654	1.5496	1.4113
73.9	1.2467	1.7923	2.347	1.2247
74	0.8613	1.5234	1.9134	0.8497
74.1	0.8285	1.6649	1.9185	0.9828
74.2	1.2298	1.7579	2.0544	0.9928
74.3	1.1095	1.5164	1.9476	1.1446
74.4	1.6154	1.8459	1.7628	1.2878
74.5	1.1831	1.8846	1.749	0.9995
74.6	0.821	1.4228	1.711	1.1008
74.7	1.1979	1.4531	1.6601	1.1746
74.8	1.1068	1.885	1.4325	1.1584
74.9	1.1153	1.5663	1.8326	1.3298
75	1.0845	1.4474	2.0437	1.3642
75.1	1.1257	1.7581	1.9787	1.304
75.2	1.0866	1.6432	1.8511	1.2655
75.3	1.1237	1.7202	1.9654	1.2762
75.4	1.4913	1.8175	1.6834	1.1339
75.5	1.4492	1.5589	1.7428	1.134
75.6	1.1936	1.5138	1.7413	1.2987
75.7	1.0638	1.4848	1.8728	1.0527
75.8	1.24	1.8404	1.9043	1.4123
75.9	1.2426	1.4067	1.8498	1.1746
76	1.2395	1.6737	1.7135	1.2563
76.1	1.381	1.5494	1.8015	1.2889
76.2	1.2149	1.7699	1.8705	1.2411
76.3	0.975	1.7221	1.8092	1.0141
76.4	1.1576	1.827	1.9376	1.2514
76.5	1.1526	1.7859	1.9863	1.2933
76.6	1.1557	1.7321	1.8585	1.4072
76.7	0.894	1.5383	1.8395	1.3536
76.8	0.9237	1.6283	1.9295	1.1421
76.9	1.066	1.7669	1.9125	1.2624
77	0.8516	1.6448	1.7967	1.1702
77.1	1.1548	1.8395	1.8171	1.3637
77.2	0.9632	1.5933	1.846	1.0753
77.3	1.0843	1.9285	1.8046	1.1203
77.4	1.0439	1.7592	2.1073	1.1793
77.5	1.2526	1.6923	1.9794	1.3
77.6	0.9331	1.7138	1.9365	1.1554
77.7	0.9156	1.8611	1.679	1.2103
77.8	1.1685	1.7284	1.9606	1.0492
77.9	1.1522	1.5886	1.772	1.3934
78	1.174	1.5524	1.8262	1.3985
78.1	1.1621	1.4359	1.9213	1.5375
78.2	1.1158	1.7726	1.9332	1.4764
78.3	0.9712	1.8164	1.9682	1.3749
78.4	1.0532	1.6442	1.9031	1.1256
78.5	1.1245	1.7875	1.863	1.4806
78.6	1.1279	1.5779	1.7344	1.3393
78.7	1.1304	1.6345	1.8578	1.2199
78.8	1.0872	1.473	1.841	1.2011
78.9	1.3409	1.6584	1.8831	1.2893
79	1.2043	1.7549	1.9836	1.4678
79.1	1.2352	1.5669	1.9515	1.2915
79.2	1.1941	1.6487	1.8261	1.4898
79.3	0.9336	1.7252	1.7384	1.563
79.4	1.0392	2.031	2.0307	1.1918
79.5	1.2271	1.6909	1.9601	1.2699
79.6	0.9916	1.7916	1.959	1.4444
79.7	0.9318	1.4935	1.7897	1.3647
79.8	1.0908	1.783	1.761	1.21
79.9	0.9089	1.8193	1.6723	1.6067
80	1.174	1.388	1.6475	1.5062
80.1	1.0177	1.4825	1.8179	1.2247
80.2	1.0255	1.6731	1.784	1.0821
80.3	1.1412	1.7684	1.7231	1.4143
80.4	1.2328	1.8357	1.8122	1.3174
80.5	1.1163	1.8356	1.7791	1.505
80.6	1.2886	1.9039	1.7395	1.5414
80.7	1.0578	1.6778	1.7488	1.0204
80.8	1.2364	1.7225	1.6897	1.2526
80.9	1.0266	1.5918	1.898	1.2563
81	1.0643	1.6828	1.3086	1.1625
81.1	1.0253	1.9679	1.2946	1.2455
81.2	1.1678	1.93	1.9351	1.4891
81.3	1.0498	2.2511	1.3492	1.558
81.4	1.0705	1.8837	1.538	1.5094
81.5	0.9655	1.7266	1.6295	1.3273
81.6	1.0078	1.9126	1.5075	1.4612
81.7	1.0876	1.8788	1.8963	1.2294
81.8	0.8705	1.7053	1.9348	1.1933
81.9	0.9619	1.7758	2.1184	1.4552
82	0.933	1.5093	1.9119	1.0298
82.1	0.714	1.8228	1.6682	1.4274
82.2	0.9084	1.868	1.5685	1.1118
82.3	0.8442	1.6747	1.5962	1.3306
82.4	1.094	1.7572	1.6044	1.4123
82.5	0.8353	1.7876	1.75	1.1747
82.6	1.2736	1.7823	1.7072	1.4136
82.7	1.054	1.6513	1.847	1.4145
82.8	0.9995	1.6416	1.8607	1.4966
82.9	0.8891	1.8463	1.7869	1.2959
83	1.0515	1.8531	2.0947	1.3134
83.1	0.9593	1.8117	1.8131	1.2693
83.2	1.0561	1.9613	1.8188	1.3315
83.3	1.123	1.6877	1.7635	1.2643
83.4	1.217	1.6664	1.7162	1.4067
83.5	1.2172	1.7828	1.8632	1.2329
83.6	0.5738	1.8192	1.4357	1.5763
83.7	1.0836	1.9642	1.8051	1.4685
83.8	1.0449	1.7645	2.0316	1.5897
83.9	1.065	1.9285	1.6492	1.5482
84	0.9792	1.6898	1.9955	1.4308
84.1	0.9138	2.0272	1.7732	1.005
84.2	0.9606	2.0607	1.6464	1.1761
84.3	0.9903	1.978	1.9623	1.3905
84.4	0.9009	2.2143	2.1044	1.3125
84.5	1.1264	2.0221	1.9486	1.5667
84.6	1.0067	1.9922	1.9563	1.2033
84.7	0.9704	1.707	1.7461	1.1384
84.8	0.8412	2.0071	1.8402	1.1785
84.9	1.2492	2.4005	1.7858	1.2757
85	0.9977	2.3282	1.9622	1.1089
85.1	1.1201	2.0672	1.686	1.7403
85.2	1.1856	2.4165	1.9276	1.4675
85.3	0.899	2.412	1.6786	1.2369
85.4	0.9276	1.9033	1.8967	1.1204
85.5	0.898	2.3308	2.0441	1.5414
85.6	1.0129	1.8665	1.9165	1.4156
85.7	0.9198	1.9701	2.0458	1.4259
85.8	1.0536	1.9421	1.7158	1.5365
85.9	1.1836	1.9809	1.9494	1.3318
86	1.2917	1.927	2.1692	1.1968
86.1	1.2557	1.7324	1.745	1.4596
86.2	1.1737	1.69	2.0473	1.2716
86.3	1.146	1.8558	1.9321	1.3239
86.4	1.1108	1.7094	2.0807	1.2522
86.5	1.077	1.8226	2.0372	1.3492
86.6	1.3814	1.627	2.1513	1.3019
86.7	1.3343	1.6042	1.9138	1.3392
86.8	1.2616	1.8201	2.0523	1.3353
86.9	1.1786	1.639	1.9296	1.4822
87	1.0453	1.6181	2.0918	1.8753
87.1	0.9858	1.6785	2.0296	1.9278
87.2	1.3968	1.7975	1.9993	1.4613
87.3	1.2528	1.8334	2.0746	1.5786
87.4	1.1583	1.5222	2.255	1.7578
87.5	0.968	1.7557	2.0882	1.5027
87.6	0.9149	1.8178	2.055	1.6174
87.7	1.1671	1.7129	1.7317	1.3858
87.8	1.0913	1.7002	2.1439	1.6363
87.9	1.219	1.4117	2.1522	1.2607
88	1.1554	1.9138	1.9038	1.2718
88.1	1.2322	1.9373	1.8034	1.4825
88.2	1.0961	1.7777	1.936	1.405
88.3	1.1815	1.7228	2.0951	1.4727
88.4	1.1227	1.6144	2.0516	1.5302
88.5	1.3084	1.6898	2.0587	1.4651
88.6	1.3612	1.5015	2.288	1.4375
88.7	1.3079	1.641	2.0351	1.3809
88.8	1.3343	1.6954	1.9418	1.3803
88.9	1.3897	1.7836	1.925	1.3147
89	1.1568	1.8168	2.0796	1.4668
89.1	1.3667	1.5849	2.1065	1.3041
89.2	1.0776	1.6995	1.8542	1.1559
89.3	1.1467	1.6874	1.9705	1.2472
89.4	1.0902	1.5562	2.0558	1.3926
89.5	1.094	1.8532	1.92	1.25
89.6	1.1145	1.9571	1.8508	1.3909
89.7	1.2475	1.7653	1.8629	1.2477
89.8	0.9827	1.7474	2.0967	1.4992
89.9	1.1865	1.5753	2.1728	1.6795
90	1.1558	1.6877	1.7858	1.4817
90.1	1.1519	1.6732	2.0701	1.62
90.2	1.1951	1.7079	1.9558	1.3659
90.3	1.2514	1.791	2.1484	1.3566
90.4	1.0806	1.7235	2.0831	1.5583
90.5	1.0896	1.5832	1.7493	1.1679
90.6	1.1387	1.5861	2.0299	1.4133
90.7	0.9214	1.5881	2.186	1.4895
90.8	0.9827	1.6507	2.177	1.4776
90.9	1.3269	1.7536	2.112	1.2609
91	1.1516	1.8039	1.9003	1.2496
91.1	1.1063	1.7084	1.8718	1.3909
91.2	1.1089	1.6295	2.0304	1.3783
91.3	1.1551	1.7073	2.3028	1.3916
91.4	1.1356	1.5773	2.1904	1.5021
91.5	1.2128	1.779	2.0391	1.5083
91.6	1.2847	1.6768	1.6406	1.523
91.7	1.1962	1.5834	1.6842	1.0756
91.8	1.379	1.5523	1.7313	1.3996
91.9	1.323	1.6567	2.1609	1.1688
92	1.319	1.4937	1.6917	1.2595
92.1	1.2228	1.5492	1.7161	1.1896
92.2	1.1286	1.705	1.954	1.9662
92.3	1.1238	2.1502	2.2512	1.1924
92.4	1.1934	1.9925	2.0106	1.2206
92.5	0.99	1.72	1.6219	1.4871
92.6	0.9193	1.5991	1.9978	1.5961
92.7	1.0461	1.7548	1.7819	1.3606
92.8	0.9522	1.6944	1.875	1.4781
92.9	0.9286	1.6525	2.0993	1.2793
93	0.9716	1.4204	1.8893	1.2769
93.1	1.092	2.064	1.8184	1.2499
93.2	1.2551	1.7685	2.0136	1.4098
93.3	1.0311	1.6647	1.968	1.562
93.4	0.9792	1.6133	1.7668	1.4683
93.5	0.9572	1.7639	1.6961	1.2625
93.6	1.0922	1.6055	1.7984	1.2992
93.7	1.0782	1.4896	1.6387	1.4765
93.8	1.0255	1.7701	1.8302	1.2214
93.9	1.0887	1.6567	1.644	1.295
94	1.1011	1.4337	1.9506	1.3735
94.1	1.2503	1.4979	1.929	1.3183
94.2	1.2555	1.4159	1.8341	1.3047
94.3	1.1662	1.7067	1.7409	1.3588
94.4	1.2136	1.585	1.7324	1.5628
94.5	1.176	1.6123	1.8928	1.5732
94.6	0.9071	1.7331	2.2782	1.5278
94.7	1.1594	1.8346	1.9033	1.4467
94.8	1.4994	1.574	2.1366	1.5278
94.9	1.0371	2.0056	1.9265	1.3325
95	0.9777	1.7725	1.6775	1.3412
95.1	1.0552	1.5427	1.8294	1.7261
95.2	1.0101	1.4711	1.4309	1.5442
95.3	1.2214	1.4775	1.9276	1.531
95.4	1.0291	1.9017	1.207	1.6436
95.5	0.863	1.7367	1.6278	1.4802
95.6	1.279	1.7341	1.6029	1.4758
95.7	0.9495	1.465	1.8794	1.3885
95.8	1	1.4865	1.3667	1.377
95.9	1.1075	1.769	1.5421	1.3985
96	1.0605	1.8231	1.4931	1.5206
96.1	0.94	1.6441	1.4132	1.3692
96.2	1.0969	1.5279	1.4703	1.517
96.3	1.1261	1.4115	1.6083	1.4539
96.4	1.4057	1.4581	1.9375	1.7363
96.5	1.103	1.8578	1.8316	1.6591
96.6	1.1984	1.7312	1.7134	1.5634
96.7	1.3771	1.9201	1.4602	1.4832
96.8	0.9136	1.7231	1.6468	2.1124
96.9	0.8265	1.902	1.6574	1.4861
97	1.0769	1.85	1.7143	1.2672
97.1	1.0205	1.6692	1.5457	1.3185
97.2	1.3547	1.7734	1.7541	1.3571
97.3	1.4812	1.7336	1.5075	1.3287
97.4	1.4297	1.7342	1.6382	1.3002
97.5	1.3416	1.6417	1.5888	1.2554
97.6	1.3958	1.6265	1.401	1.4388
97.7	1.1167	1.8712	1.4576	1.6931
97.8	1.2558	1.9675	1.6452	1.5393
97.9	1.1605	1.4257	1.5823	1.4358
98	1.173	1.8616	1.2568	1.4654
98.1	1.2445	1.8463	1.4642	1.5415
98.2	1.1475	1.7148	1.3933	1.3298
98.3	1.0691	1.6469	1.5779	1.5114
98.4	1.0844	1.686	1.4228	1.5328
98.5	1.0742	1.7468	1.5731	1.3237
98.6	0.977	1.5368	1.4356	1.5702
98.7	1.1005	1.7432	1.6054	1.3589
98.8	1.4718	1.8694	1.9367	1.5344
98.9	1.0308	1.6929	2.1368	1.5466
99	1.0225	1.45	1.7531	1.5013
99.1	1.2028	1.9825	1.8475	1.5961
99.2	1.5583	1.6982	1.8285	1.6435
99.3	1.2451	1.507	1.4828	1.6863
99.4	1.3746	1.5659	1.9352	1.5292
99.5	1.3284	1.6273	1.5959	1.5676
99.6	1.4349	1.5341	1.4855	1.4801
99.7	1.3128	1.7792	1.6687	1.5176
99.8	1.1223	1.7862	1.7969	1.2028
99.9	1.2215	1.5831	1.8083	1.2677
100	1.4221	1.5159	1.7074	1.4865

## Sheet: Protein RMSD
Time(ns)	WT	T313A	E314Y	T313A+E314Y
0.1	3.5851	3.6251	3.7138	3.1636
0.2	3.7893	3.7747	3.5311	3.1734
0.3	3.7893	3.5962	3.5969	2.9692
0.4	3.7019	3.5185	3.3862	3.0461
0.5	3.5291	3.7769	3.549	3.0517
0.6	3.6355	3.5	3.6061	3.0289
0.7	3.6423	3.3404	3.7157	3.0533
0.8	3.8365	3.4012	3.7251	3.1537
0.9	3.864	3.5217	3.6092	3.0879
1	3.7195	3.4676	3.6037	3.3504
1.1	3.7628	3.3979	3.574	3.1163
1.2	3.8617	3.412	3.6703	3.3853
1.3	3.7218	3.3862	3.567	3.2157
1.4	3.9135	3.6324	3.7192	3.241
1.5	3.7655	3.6724	3.689	2.7852
1.6	3.7715	3.7215	3.9981	3.0205
1.7	3.8462	3.8238	4.2624	3.1814
1.8	3.7506	3.7586	4.0416	3.1662
1.9	3.6532	3.8338	4.314	3.1853
2	3.7966	3.9554	4.4412	3.064
2.1	3.7733	3.7417	4.1562	3.0242
2.2	3.8714	3.7916	4.1912	2.9861
2.3	3.8755	3.7335	4.2631	3.0141
2.4	3.8556	3.5712	4.2971	3.0377
2.5	3.566	3.7396	4.3173	3.1741
2.6	3.6824	3.5942	4.2152	3.1076
2.7	3.6754	3.6977	4.2326	2.8911
2.8	3.5973	4.0449	4.3178	2.9616
2.9	3.5748	3.789	4.1776	2.9962
3	3.6172	3.5996	4.3381	3.1567
3.1	3.5979	3.8297	4.2336	3.1168
3.2	3.7541	3.5544	4.3007	3.2423
3.3	3.6763	3.6139	4.0621	3.1521
3.4	3.6202	3.6914	4.0041	3.0958
3.5	3.7174	3.4596	4.1937	3.0958
3.6	3.6792	3.5766	4.2783	3.0769
3.7	3.7566	3.7656	3.8388	3.2797
3.8	3.7738	3.5361	3.8561	3.2874
3.9	3.6551	3.8109	3.759	3.3881
4	3.6163	3.6153	3.9988	3.3834
4.1	3.6591	3.5954	4.1383	3.1458
4.2	3.6945	3.6784	3.9459	3.2228
4.3	3.7258	3.7146	3.935	3.2939
4.4	3.7696	3.4518	3.8572	3.1179
4.5	3.6753	3.3068	3.7766	3.3035
4.6	3.7866	3.413	3.8714	3.2587
4.7	3.8838	3.5345	3.8386	3.3246
4.8	3.8286	3.6825	3.8902	3.4009
4.9	3.8601	3.4374	3.7959	3.2147
5	3.8462	3.6407	3.6554	3.2133
5.1	3.7357	3.4718	3.7419	3.3252
5.2	3.8159	3.6174	3.6636	3.4483
5.3	3.9107	3.4578	3.946	3.3328
5.4	3.9632	3.5039	3.8924	3.2205
5.5	3.742	3.3614	3.9912	3.2253
5.6	3.914	3.408	3.9263	3.3364
5.7	3.8345	3.3614	3.7296	3.2946
5.8	3.9126	3.2601	3.7733	3.1811
5.9	3.7563	3.4518	3.9071	3.2075
6	3.7036	3.2131	4.1937	3.2306
6.1	3.6691	3.2777	3.9534	3.1482
6.2	3.6789	3.4157	4.193	3.0126
6.3	3.738	3.4305	4.2683	3.3263
6.4	3.7133	3.1565	4.0527	3.476
6.5	3.7718	3.1955	4.1329	3.3152
6.6	3.5858	3.3053	4.1876	3.1371
6.7	3.6782	3.4394	4.1604	3.0704
6.8	3.7354	3.3719	4.1909	3.0894
6.9	3.9014	3.4643	4.295	3.2929
7	3.8597	3.166	4.3363	3.3128
7.1	3.7527	3.363	4.3349	3.288
7.2	3.7257	3.4022	4.5377	3.1759
7.3	3.7673	3.302	4.4398	3.1843
7.4	3.8269	3.3781	4.3473	3.3321
7.5	3.761	3.1575	4.5677	3.1964
7.6	3.7073	3.207	4.2326	3.3002
7.7	3.6658	3.3267	4.3465	3.2694
7.8	3.6496	3.4394	4.4017	3.2497
7.9	3.6293	3.5369	4.1707	3.5831
8	3.628	3.4253	4.4201	3.3577
8.1	3.5292	3.778	4.3721	3.4399
8.2	3.7621	3.4461	4.1746	3.3043
8.3	3.765	3.4019	4.1376	3.4521
8.4	3.724	3.4938	4.1779	3.5897
8.5	3.7405	3.6954	4.1559	3.8606
8.6	3.597	3.7156	4.2921	3.7692
8.7	3.7063	3.5313	4.4167	3.9028
8.8	3.7001	3.3816	4.5107	3.8275
8.9	3.9118	3.4768	4.3792	3.9394
9	3.727	3.5513	4.3156	4.0468
9.1	4.0053	3.6604	4.0925	3.7287
9.2	3.9651	3.5545	4.2955	3.7539
9.3	3.9375	3.5187	4.3269	3.7163
9.4	3.8768	3.5355	4.0863	3.9593
9.5	4.0725	3.5862	4.0511	4.0046
9.6	3.8884	3.7534	4.2117	3.8912
9.7	3.7651	3.8069	3.9662	3.9028
9.8	3.5469	3.8458	3.9788	3.9131
9.9	3.6746	3.8335	4.1003	3.9418
10	3.7722	3.8182	4.0486	3.8586
10.1	3.7438	3.9552	4.1489	3.8001
10.2	3.6643	3.9038	4.0562	4.1008
10.3	3.5887	4.0137	4.2363	3.9544
10.4	3.7003	3.8389	4.2268	4.1014
10.5	3.8346	4.0254	4.1969	4.1336
10.6	3.8004	3.988	4.1209	4.2486
10.7	3.6351	4.0199	4.0019	4.5079
10.8	3.6946	4.1414	4.19	4.386
10.9	3.6993	4.0316	4.2492	4.3018
11	3.717	4.2031	4.4564	4.2066
11.1	3.7199	4.0387	4.2552	4.4357
11.2	3.7643	4.3692	4.4005	4.4453
11.3	3.7691	4.2125	4.5544	4.1269
11.4	3.7373	4.2355	4.4045	4.0651
11.5	3.7329	4.1979	4.6545	4.2224
11.6	3.7951	4.2224	4.6332	4.2239
11.7	3.7723	3.864	4.5866	4.1472
11.8	3.7147	4.124	4.5093	4.4014
11.9	3.7286	4.0815	4.5828	4.5022
12	3.6773	4.2769	4.7743	4.6334
12.1	3.828	4.2018	4.5422	4.4813
12.2	3.7629	4.0841	4.5306	4.6121
12.3	3.6236	3.9493	4.5832	4.7523
12.4	3.6973	4.1671	4.8299	4.6092
12.5	3.6627	4.2338	4.8588	4.798
12.6	3.6425	4.3399	4.6589	4.6402
12.7	3.8075	4.3736	4.7764	4.4501
12.8	3.7093	4.2767	5.1528	4.5483
12.9	3.6728	4.1006	5.1249	4.7112
13	3.5992	4.0103	4.9169	4.5832
13.1	3.6654	4.0558	5.0416	4.677
13.2	3.6963	3.924	4.6732	4.4924
13.3	3.6879	3.8064	4.6765	4.6528
13.4	3.5961	3.8481	4.8882	4.6489
13.5	3.6195	3.8469	4.8906	4.4706
13.6	3.6035	3.5934	4.6256	4.6928
13.7	3.6761	3.5135	4.467	4.7508
13.8	3.6508	3.6471	4.5147	4.7264
13.9	3.4859	3.4907	4.744	4.5934
14	3.5051	3.6125	4.5949	4.4947
14.1	3.6267	3.6413	4.5319	4.5551
14.2	3.7305	3.6033	4.6468	4.6487
14.3	3.5759	3.6314	4.4017	4.7025
14.4	3.6096	3.6693	4.3207	4.7364
14.5	3.5859	3.5436	4.5339	4.8164
14.6	3.4845	3.5444	4.519	4.821
14.7	3.5367	3.7358	4.4665	4.8687
14.8	3.3958	3.6457	4.496	4.9411
14.9	3.4688	3.7625	4.2995	4.7547
15	3.5163	3.9344	4.6248	4.705
15.1	3.5982	4.0841	4.4791	4.7728
15.2	3.5369	3.8377	4.5102	4.8316
15.3	3.5031	3.8433	4.569	4.7749
15.4	3.5084	3.9487	4.5459	4.8487
15.5	3.598	3.9614	4.5745	4.7205
15.6	3.5498	4.2067	4.5512	4.9854
15.7	3.613	3.9051	4.7279	5.047
15.8	3.6636	3.6978	4.5834	4.9146
15.9	3.612	3.7953	4.7754	4.905
16	3.5814	3.9864	4.4893	5.167
16.1	3.6005	4.2585	4.5678	4.9066
16.2	3.6093	4.0677	4.779	4.7271
16.3	3.5297	3.7807	4.6445	4.7567
16.4	3.5854	3.8174	4.1166	4.7109
16.5	3.6926	4.0798	4.3747	4.6664
16.6	3.6201	3.9961	4.394	4.6426
16.7	3.6426	4.1129	4.4547	4.5725
16.8	3.8045	4.1397	4.5449	4.4537
16.9	3.6824	3.8091	4.5439	4.6979
17	3.7479	3.8887	4.406	4.9317
17.1	3.6513	4.1959	4.2949	4.884
17.2	3.6747	4.0712	4.2426	4.7904
17.3	3.6799	4.2207	4.1918	4.998
17.4	3.6835	4.4764	4.2062	5.0861
17.5	3.5806	4.9277	4.0876	4.9869
17.6	3.5973	4.8246	4.2936	5.4616
17.7	3.6726	4.4665	4.2024	5.6132
17.8	3.7675	4.3741	4.131	5.2831
17.9	3.8198	4.463	4.3075	5.1883
18	3.8141	4.6294	4.4251	4.8288
18.1	3.7747	4.3231	4.2764	5.1388
18.2	3.629	4.7387	4.4531	5.3905
18.3	3.6775	4.3333	4.2941	5.4287
18.4	3.7667	4.2373	4.5085	5.4292
18.5	3.6994	4.5042	4.1987	5.4705
18.6	3.6351	4.5504	4.2523	5.5848
18.7	3.7516	4.4519	4.4843	5.6178
18.8	3.5706	4.3464	4.4457	5.6799
18.9	3.6657	4.2668	4.0126	5.7513
19	3.7097	4.3821	3.9242	5.707
19.1	3.7591	4.44	4.061	5.5793
19.2	3.6528	4.5835	3.9479	5.8191
19.3	3.5766	4.559	3.8337	5.7392
19.4	3.5402	4.6165	3.7143	5.8512
19.5	3.5126	4.417	3.7394	5.7881
19.6	3.6433	4.7443	3.6992	5.7657
19.7	3.4392	4.7462	3.7672	5.5543
19.8	3.466	4.4737	3.8046	4.9428
19.9	3.3338	4.5433	3.6316	5.031
20	3.3319	4.5833	3.8262	5.0365
20.1	3.3782	4.3599	3.9436	5.1602
20.2	3.4647	4.4788	3.8768	5.373
20.3	3.3238	4.4417	3.975	5.7249
20.4	3.4609	4.3879	3.9894	5.4862
20.5	3.4393	4.0491	3.9528	5.3599
20.6	3.4617	4.4842	3.9461	5.4342
20.7	3.6653	4.5728	3.6825	5.633
20.8	3.5528	4.6404	3.6427	5.6669
20.9	3.4685	4.8569	3.5751	5.7081
21	3.4924	4.8783	3.7309	5.9767
21.1	3.5111	4.6789	3.7801	5.5623
21.2	3.4142	4.5724	3.7383	5.6401
21.3	3.6253	4.7624	3.7186	5.556
21.4	3.461	4.5044	3.6214	5.4166
21.5	3.5403	4.4886	3.9101	5.1967
21.6	3.6724	4.7044	3.8147	5.2335
21.7	3.6416	4.5202	3.7534	5.567
21.8	3.5131	4.3295	3.9225	5.3774
21.9	3.6864	4.1848	4.0279	5.4722
22	3.5812	4.4402	4.0434	5.6647
22.1	3.555	4.1159	3.8914	5.7329
22.2	3.6027	4.0474	3.8361	5.4672
22.3	3.7036	4.0155	3.7583	5.5779
22.4	3.6926	4.2563	3.7784	5.885
22.5	3.5455	4.622	3.6444	5.9319
22.6	3.5307	4.5873	3.8055	6.0236
22.7	3.6423	4.8524	3.8977	5.9573
22.8	3.5928	4.7649	4.0724	6.1877
22.9	3.5087	4.8474	4.1838	5.7206
23	3.5654	4.6897	4.2418	5.9451
23.1	3.6185	4.9139	4.103	6.0661
23.2	3.7566	5.0832	4.0641	6.207
23.3	3.7752	5.0607	3.9318	5.8616
23.4	3.6153	4.8847	4.0352	6.0046
23.5	3.7037	4.6779	3.9467	5.9696
23.6	3.7011	4.5304	3.9937	5.8936
23.7	3.7646	4.338	3.7585	5.8908
23.8	3.6575	4.3303	3.7336	6.0301
23.9	3.5212	4.3916	3.8663	5.7522
24	3.5742	4.2756	3.8418	5.9309
24.1	3.565	4.6009	3.7389	6.063
24.2	3.6748	4.3451	3.8225	5.8424
24.3	3.6291	4.0482	3.9023	6.0448
24.4	3.5088	4.1323	3.8487	5.9601
24.5	3.4727	4.1419	3.8264	6.0296
24.6	3.4541	4.136	3.8055	6.1039
24.7	3.5118	4.2978	3.8158	6.1497
24.8	3.4892	4.2544	3.6355	6.0737
24.9	3.3674	4.2533	3.7853	6.1046
25	3.4634	4.1767	3.7343	5.9965
25.1	3.5744	3.9574	3.8511	6.0021
25.2	3.563	3.8565	3.8898	5.828
25.3	3.5553	3.9316	3.8678	5.5858
25.4	3.6591	4.0189	3.8081	6.0844
25.5	3.4617	4.2436	3.736	5.6039
25.6	3.5923	4.5329	3.8329	5.467
25.7	3.603	4.2274	3.6137	5.5244
25.8	3.5622	4.1163	3.705	5.4028
25.9	3.513	3.9164	3.8141	5.2269
26	3.6079	4.1727	3.8606	5.4814
26.1	3.7182	4.3513	3.9387	5.3605
26.2	3.8965	4.4889	4.0316	5.4627
26.3	3.685	4.1511	3.9499	5.4537
26.4	3.5296	4.5643	4.052	5.5212
26.5	3.5978	4.2848	4.1181	5.41
26.6	3.5138	4.0211	4.0811	5.4411
26.7	3.4977	4.174	4.0485	5.6283
26.8	3.5345	4.1983	4.0858	5.5298
26.9	3.6598	4.3059	3.9911	5.5331
27	3.518	4.4672	4.0043	5.6646
27.1	3.5782	4.4512	4.0635	5.575
27.2	3.6831	4.0288	4.0923	5.5698
27.3	3.6581	4.1475	4.2478	5.3039
27.4	3.5418	4.0444	4.2942	5.3112
27.5	3.6491	4.4115	4.1614	4.9366
27.6	3.5685	4.5664	4.1422	5.0724
27.7	3.5909	4.7903	4.2476	4.8928
27.8	3.6168	4.3598	4.1529	5.1012
27.9	3.4556	4.2721	4.2343	5.1559
28	3.5638	4.2488	4.179	5.2106
28.1	3.4782	3.994	4.0674	5.2465
28.2	3.395	3.9582	4.0712	5.3709
28.3	3.6396	4.3027	4.076	5.2595
28.4	3.4093	4.1534	4.0055	5.5929
28.5	3.4222	4.0053	4.1151	5.5459
28.6	3.5183	4.1647	4.0886	5.3571
28.7	3.6353	3.7758	4.1692	5.071
28.8	3.6991	3.9931	4.18	5.1988
28.9	3.5885	3.677	3.9799	5.2193
29	3.6285	3.8903	4.1845	5.1377
29.1	3.668	3.8888	4.13	5.3522
29.2	3.6531	3.8332	4.0241	5.0811
29.3	3.6617	3.7426	3.9668	5.2243
29.4	3.6732	3.9206	4.0382	5.3666
29.5	3.7334	3.7575	4.0393	5.5141
29.6	3.7315	3.6804	4.1264	5.7704
29.7	3.6864	3.9557	4.0502	5.9499
29.8	3.7967	4.0683	3.9073	5.7943
29.9	3.8261	4.1936	4.0057	5.5248
30	3.6274	3.9472	4.1039	5.7426
30.1	3.6213	3.8497	4.0413	5.7577
30.2	3.7361	3.929	3.9819	5.984
30.3	3.6281	3.9514	4.0432	5.755
30.4	3.643	4.1478	4.0184	5.8395
30.5	3.6801	4.2903	4.0492	5.5263
30.6	3.6446	4.0447	4.3294	5.7439
30.7	3.7821	4.0885	4.1542	5.7952
30.8	3.6562	4.2256	4.1812	5.6554
30.9	3.6805	4.0519	4.2578	5.7791
31	3.6513	4.3272	4.2253	5.7178
31.1	3.545	4.4543	4.0922	5.7394
31.2	3.6122	4.4449	4.0806	5.8867
31.3	3.6155	4.6655	4.1215	5.7458
31.4	3.5892	4.6288	4.255	5.6025
31.5	3.6152	4.6082	4.1595	5.561
31.6	3.6594	4.8501	4.1099	5.5079
31.7	3.6764	4.8423	4.0744	5.7112
31.8	3.6952	4.7104	4.1207	5.7983
31.9	3.7978	4.8717	4.0648	5.7678
32	3.7314	4.8791	4.0393	5.7751
32.1	3.7102	4.8882	4.1595	5.7794
32.2	3.6867	5.1464	3.9767	5.7404
32.3	3.7849	4.9615	3.8843	5.3796
32.4	3.6606	4.8765	4.161	5.3506
32.5	3.6361	4.422	4.0371	5.3029
32.6	3.5111	4.5681	3.9956	5.1543
32.7	3.5898	4.6594	4.0114	5.2931
32.8	3.6232	4.5318	3.9214	5.4775
32.9	3.5248	4.7556	4.0446	5.4844
33	3.5568	4.8789	3.9936	5.4545
33.1	3.7291	4.8799	4.2887	5.5059
33.2	3.7019	4.7076	4.2641	5.6516
33.3	3.6919	4.4979	4.2157	5.9511
33.4	3.65	4.6201	4.1274	5.9311
33.5	3.7993	4.6915	4.1612	5.8496
33.6	3.6626	4.5374	4.2698	5.9859
33.7	3.741	4.703	4.2293	6.1067
33.8	3.7623	4.747	4.3102	5.9252
33.9	3.7951	4.7154	4.3031	6.3001
34	3.7825	4.8673	4.2008	6.2764
34.1	3.8153	4.5583	4.1436	6.3101
34.2	3.7342	4.5616	4.3526	6.1393
34.3	3.7915	4.6975	3.9719	6.0928
34.4	3.7791	4.5623	4.0116	6.3945
34.5	3.7724	4.7	3.8618	6.3698
34.6	3.597	4.7545	3.9208	6.4736
34.7	3.6547	4.5296	4.0915	6.4468
34.8	3.6151	4.2758	4.0301	6.4397
34.9	3.7034	4.2777	4.082	6.49
35	3.6047	4.5067	4.1807	6.3153
35.1	3.6774	4.4035	4.0532	6.0122
35.2	3.659	4.4692	3.9526	6.0512
35.3	3.6429	4.5431	3.9622	6.0458
35.4	3.8181	4.3461	4.0449	5.5544
35.5	3.759	4.3375	4.0991	5.5631
35.6	3.8843	4.2329	4.0871	5.9048
35.7	3.7107	4.6603	4.0205	6.0423
35.8	3.6958	4.8032	4.2049	6.1346
35.9	3.5781	4.7146	4.1308	6.3268
36	3.5087	4.8174	4.1096	6.0776
36.1	3.4809	4.4554	3.9572	6.3267
36.2	3.5931	4.6368	3.7765	6.0957
36.3	3.5833	4.6963	4.003	5.9682
36.4	3.668	4.6286	3.8793	5.996
36.5	3.823	4.6824	3.7522	6.0277
36.6	3.6944	4.8867	3.9474	6.0709
36.7	3.7326	5.1079	3.9432	6.0546
36.8	3.7583	4.8966	3.9876	6.0859
36.9	3.6876	4.7971	3.9385	6.0807
37	3.6376	4.9733	3.9631	6.1329
37.1	3.6323	4.5085	3.8591	6.0655
37.2	3.5042	4.7726	3.9565	6.1911
37.3	3.7587	5.0556	4.052	6.0302
37.4	3.7575	4.8604	3.9308	6.071
37.5	3.6664	4.7222	3.9629	6.1807
37.6	3.7699	4.5825	4.0783	6.0653
37.7	3.8229	4.5812	4.1689	5.8909
37.8	3.8589	4.1749	4.001	5.9185
37.9	3.8444	4.0491	4.0373	5.977
38	3.7728	4.2166	4.0931	5.7767
38.1	3.8124	4.4756	3.996	5.8236
38.2	3.7717	4.5275	4.0491	5.7438
38.3	3.8395	4.1653	4.1508	5.7086
38.4	3.8804	4.5642	4.2125	5.6235
38.5	3.838	4.2836	4.0846	5.6949
38.6	3.767	4.2204	3.873	5.5504
38.7	3.9333	4.2427	4.0177	5.5108
38.8	3.8269	4.4597	4.0607	5.6812
38.9	3.6579	4.3943	3.9329	5.8859
39	3.7658	4.233	3.8974	5.9854
39.1	3.8118	4.2366	3.8317	5.9035
39.2	3.6753	4.483	4.0814	6.0684
39.3	3.7791	4.5823	4.0194	5.9345
39.4	3.7042	4.7396	3.952	6.1671
39.5	3.8984	4.8314	4.0252	6.1199
39.6	3.8333	4.6456	4.0184	6.2084
39.7	3.7565	4.6947	4.0657	5.9948
39.8	3.9382	4.6264	3.9966	6.1899
39.9	3.8186	4.3897	3.9871	6.1735
40	3.8482	4.4669	4.2013	6.2197
40.1	3.7979	4.5363	4.0958	6.2236
40.2	3.7018	4.4241	3.9867	6.1684
40.3	3.7719	4.5826	3.9732	6.2348
40.4	3.6888	4.7677	4.0073	6.2255
40.5	3.684	4.7497	3.9998	6.2227
40.6	3.932	5.1209	4.0028	6.1963
40.7	3.8829	4.9932	3.9014	6.1116
40.8	3.7979	4.7442	4.0292	6.0653
40.9	3.9145	4.8982	4.0788	6.2678
41	3.8	4.5407	3.9754	6.3788
41.1	3.9121	4.6539	4.1242	6.2051
41.2	3.8902	4.5598	3.9322	6.2988
41.3	3.9677	4.5208	4.0739	6.3939
41.4	3.7178	4.1835	4.1283	6.2328
41.5	3.8357	4.4119	4.1806	6.1063
41.6	3.7154	4.5895	4.2401	6.276
41.7	3.7301	4.6786	4.2416	6.1346
41.8	3.7212	4.907	4.2351	6.198
41.9	3.7181	4.7222	4.3354	6.2359
42	3.8514	4.63	4.3587	6.3103
42.1	3.7671	4.7303	4.0502	6.3407
42.2	3.778	4.5763	4.244	6.3402
42.3	3.8421	4.5372	4.1565	6.2135
42.4	3.8134	4.4888	4.2555	6.0782
42.5	3.8567	4.4381	4.4161	6.0425
42.6	3.8194	4.2691	4.4741	6.0795
42.7	3.786	4.4074	4.4543	6.1312
42.8	3.7198	4.2785	4.4284	6.1547
42.9	3.6455	4.2187	4.4649	6.1232
43	3.6106	4.3588	4.5907	6.0131
43.1	3.6178	4.2261	4.4621	6.1053
43.2	3.6181	4.0684	4.3866	6.0312
43.3	3.5873	3.9292	4.463	6.0464
43.4	3.5422	3.8472	4.2737	6.2965
43.5	3.5446	3.8878	4.3369	6.3422
43.6	3.5914	3.9157	4.2465	6.2933
43.7	3.6414	3.7818	4.3831	6.2901
43.8	3.6289	3.8549	4.5212	6.4113
43.9	3.6717	4.0333	4.6046	6.3395
44	3.7597	3.9758	4.5433	6.3091
44.1	3.6181	3.7157	4.3115	6.251
44.2	3.4515	3.7602	4.4952	6.3069
44.3	3.4834	3.9117	4.3961	6.2658
44.4	3.5993	3.7629	4.0804	6.3692
44.5	3.7354	3.9094	4.3766	6.275
44.6	3.6738	3.9043	4.3545	6.3228
44.7	3.6167	4.0894	4.3755	6.2105
44.8	3.6753	4.1121	4.4371	6.1832
44.9	3.7428	3.9448	4.4875	6.2102
45	3.8405	3.9839	4.6312	6.1082
45.1	3.8688	3.771	4.5282	6.167
45.2	3.8353	3.8313	4.6145	6.2303
45.3	3.9344	3.681	4.5258	6.1677
45.4	3.8346	3.9682	4.5247	6.2814
45.5	3.8705	3.9821	4.4453	6.2612
45.6	3.799	3.774	4.7197	6.4774
45.7	3.7304	3.8722	4.7304	6.4161
45.8	3.7768	3.827	4.839	6.2079
45.9	3.8753	3.973	4.6662	6.2497
46	3.8783	4.2202	4.8121	6.1652
46.1	3.8802	3.9606	4.7069	6.1709
46.2	3.8202	4.0033	4.7427	6.1979
46.3	3.88	3.9774	4.7621	6.2085
46.4	4.0078	4.1138	4.5819	6.2269
46.5	3.9539	4.1098	4.5923	6.1744
46.6	4.0003	4.2924	4.496	6.3406
46.7	3.9568	3.8507	4.4188	6.2533
46.8	3.9594	4.0967	4.2981	6.3178
46.9	3.9819	4.056	4.2291	6.3239
47	4.1413	4.0399	4.0828	6.2529
47.1	3.9879	4.129	4.0981	6.2847
47.2	4.0433	3.9237	4.3779	6.3708
47.3	4.1218	3.8937	4.3584	6.2815
47.4	4.0968	4.0275	4.3725	6.3701
47.5	4.0332	4.4347	4.2901	6.4583
47.6	3.9577	4.4093	4.225	6.5448
47.7	3.9425	4.4553	4.1051	6.3847
47.8	3.882	4.4198	4.0755	6.1082
47.9	4.0286	4.6525	4.2114	5.9806
48	4.1007	4.7192	4.1026	5.9926
48.1	3.9933	4.478	4.1863	6.0198
48.2	4.0584	4.4301	4.3507	5.8452
48.3	4.0689	4.2374	4.2577	6.0845
48.4	3.9991	4.1122	4.1383	6.1678
48.5	4.0061	4.2141	4.3498	6.2494
48.6	3.9843	4.4542	4.3399	6.1606
48.7	4.0406	4.4171	4.2864	6.1277
48.8	3.9591	4.4175	4.2161	6.3392
48.9	3.9336	4.2104	4.1679	6.2803
49	4.0284	4.1077	4.1488	6.2777
49.1	3.9443	3.8989	4.1969	6.3361
49.2	3.9048	3.9453	4.1856	6.2454
49.3	3.8381	3.8677	4.329	6.3671
49.4	3.8833	4.0555	4.429	6.5437
49.5	3.8038	4.1882	4.3235	6.7578
49.6	3.7803	3.9722	4.3353	6.5256
49.7	3.8646	4.1767	4.2218	6.5171
49.8	3.8189	4.4411	4.1913	6.4384
49.9	3.7245	4.3807	4.1013	6.3683
50	3.907	4.5656	4.1474	6.6019
50.1	3.9325	4.6965	4.4454	6.485
50.2	3.9496	4.4157	4.3292	6.3649
50.3	3.9506	4.9675	4.3367	6.2833
50.4	3.9289	5.1291	4.322	6.256
50.5	3.9653	4.821	4.3538	6.2372
50.6	4.0509	4.6431	4.3878	6.0564
50.7	3.9914	4.6026	4.4601	6.0236
50.8	3.987	4.8152	4.4565	6.2246
50.9	3.8931	4.5932	4.3649	6.137
51	3.9012	4.4467	4.3681	6.1088
51.1	4.0588	4.3172	4.1628	6.1268
51.2	3.9437	4.342	4.2158	6.1872
51.3	3.9385	4.2616	4.232	6.1489
51.4	3.9256	4.3569	4.1939	6.1332
51.5	3.8933	4.5261	4.2003	6.0352
51.6	3.8647	4.5331	4.2282	6.1694
51.7	3.9494	4.6054	4.2982	6.0706
51.8	3.9908	4.3168	4.2566	6.1435
51.9	3.7693	4.2134	4.2663	5.9756
52	3.7735	4.0091	4.2495	6.4035
52.1	3.8126	4.3526	4.3232	6.3792
52.2	3.9019	4.2013	4.267	6.2789
52.3	3.8632	4.0635	4.3687	6.2943
52.4	3.8015	4.1655	4.3336	6.2239
52.5	3.8125	3.7904	4.224	6.3658
52.6	3.7716	3.4787	4.433	6.2033
52.7	3.6999	3.6656	4.3043	5.7884
52.8	3.6742	3.886	4.3881	6.0358
52.9	3.8654	4.1059	4.3563	5.982
53	3.8694	4.0173	4.4566	5.9356
53.1	3.732	4.2092	4.3877	6.0156
53.2	3.8006	4.217	4.3956	5.9974
53.3	3.7308	4.3581	4.306	6.0515
53.4	3.7987	4.3013	4.4832	5.9751
53.5	3.8598	4.1047	4.3288	5.7392
53.6	3.8598	4.1292	4.2438	5.9433
53.7	4.0199	3.7826	4.3205	5.8035
53.8	3.89	4.0926	4.3203	5.9222
53.9	3.8999	4.1411	4.485	5.959
54	3.8836	3.9316	4.4295	6.0647
54.1	3.8087	3.8914	4.5208	5.8504
54.2	3.8476	4.1232	4.3139	5.9947
54.3	3.747	4.0592	4.3265	6.0862
54.4	3.7195	3.8646	4.3555	5.9799
54.5	3.7045	3.8798	4.4213	6.0171
54.6	3.7299	4.1486	4.2861	5.8955
54.7	3.7541	4.1367	4.3735	5.943
54.8	3.8586	4.066	4.4153	5.7761
54.9	3.8797	4.4859	4.494	5.8769
55	3.7714	4.5314	4.3835	5.9317
55.1	3.8738	4.4407	4.3977	5.7823
55.2	3.7766	4.6901	4.4931	5.8902
55.3	3.7103	4.236	4.4935	6.0092
55.4	3.704	4.264	4.6332	5.8439
55.5	3.8222	4.0927	4.5317	5.8841
55.6	3.9674	4.2093	4.5763	5.9877
55.7	4.0034	4.4576	4.7279	6.1597
55.8	4.134	4.3422	4.8258	6.2418
55.9	3.8331	4.474	4.9221	6.2652
56	3.8412	4.2977	4.8288	6.0998
56.1	3.7631	4.1636	4.8094	6.1677
56.2	3.7604	4.0875	4.6396	6.2348
56.3	3.6591	3.8418	4.5202	6.1861
56.4	3.7799	4.1679	4.6934	6.1122
56.5	3.7084	4.2505	4.8101	6.1841
56.6	3.7503	4.3411	4.7146	6.1822
56.7	3.9221	4.3638	4.8607	6.1628
56.8	3.8533	4.2489	4.9958	6.1973
56.9	3.8363	4.3056	4.998	6.2432
57	3.8845	4.292	4.8155	6.409
57.1	3.7344	4.8315	4.6018	6.3994
57.2	3.9239	5.29	4.7501	6.3014
57.3	3.8874	5.0591	4.6623	6.3927
57.4	3.8851	5.3595	4.5743	6.2913
57.5	3.9143	5.4648	4.5467	6.0805
57.6	4.0017	5.6713	4.5402	5.9276
57.7	3.937	5.8002	4.3591	6.0162
57.8	3.9062	5.9265	4.5728	5.7565
57.9	3.948	5.9767	4.4912	6.023
58	3.9419	5.8629	4.5308	5.9559
58.1	3.8098	5.6525	4.5145	6.0241
58.2	3.9125	5.5633	4.4104	5.9209
58.3	4.0253	5.6777	4.6053	6.2778
58.4	4.0415	5.9222	4.7016	6.2702
58.5	4.0528	5.4038	4.4807	6.1225
58.6	3.9762	5.6568	4.5249	6.0948
58.7	4.0921	5.2164	4.504	6.0033
58.8	4.4031	5.454	4.5288	5.9329
58.9	4.3375	5.3413	4.5605	5.9557
59	4.1725	4.9406	4.6397	6.1319
59.1	4.0767	5.0567	4.5496	5.8204
59.2	4.1929	4.9506	4.5815	5.8732
59.3	4.2717	4.738	4.3728	5.9408
59.4	4.1189	4.3295	4.4676	5.7173
59.5	4.0593	4.8149	4.6179	5.8299
59.6	4.1658	4.5708	4.5648	5.9908
59.7	4.2113	4.7645	4.6003	6.2265
59.8	4.1382	4.6588	4.5947	6.2997
59.9	4.1505	4.4734	4.5758	6.1687
60	4.1729	4.4364	4.5225	6.0457
60.1	4.2575	4.5777	4.6306	6.1016
60.2	4.1502	4.5124	4.4838	6.0368
60.3	4.2357	4.5795	4.3933	5.9485
60.4	4.133	4.447	4.5412	6.1012
60.5	4.1937	4.3055	4.6451	5.8365
60.6	4.2087	4.4795	4.6998	5.9787
60.7	4.0513	4.4447	4.693	6.0965
60.8	4.1159	4.0705	4.7645	5.8049
60.9	4.1743	4.0616	4.6047	5.9038
61	4.1009	4.3661	4.6899	5.8725
61.1	4.1892	4.4708	4.7776	5.8886
61.2	4.0467	4.1622	4.5743	5.7639
61.3	4.1528	4.1028	4.5993	5.9395
61.4	4.1838	4.0823	4.6771	5.9978
61.5	4.1626	3.8174	4.7735	6.023
61.6	4.1593	3.8004	4.6696	6.0787
61.7	4.1353	3.9648	4.7739	6.0905
61.8	4.0092	4.0594	4.7644	6.0177
61.9	3.9781	4.0967	4.8406	6.0797
62	4.1535	3.7756	4.7412	6.1042
62.1	4.0283	3.8513	4.7941	6.2404
62.2	4.1755	3.8573	4.8514	6.1668
62.3	4.0651	4.0797	4.709	6.4302
62.4	4.0323	3.7744	4.6872	6.4482
62.5	4.0311	3.942	4.644	6.5473
62.6	4.0232	3.9816	4.7429	6.3904
62.7	4.0122	3.8018	4.8427	6.0104
62.8	4.1959	3.4955	4.6886	6.1461
62.9	4.1492	3.6388	4.7188	6.2383
63	4.1437	3.6691	4.7912	6.0086
63.1	4.0464	3.6847	4.7543	6.0965
63.2	3.9819	3.4959	4.8915	6.1317
63.3	4.0798	3.5526	4.7852	6.3666
63.4	4.0701	3.5447	4.7525	6.155
63.5	4.091	3.4978	4.64	6.1649
63.6	4.007	3.7258	4.6209	6.1639
63.7	4.016	3.3465	4.7404	6.2364
63.8	4.004	3.5446	4.7187	6.2323
63.9	4.1003	3.4336	4.8107	6.2439
64	4.2851	3.5099	4.6316	6.0855
64.1	4.147	3.5224	4.7891	6.1594
64.2	4.1381	3.7231	4.6312	6.0851
64.3	4.1963	3.6736	4.6516	6.0859
64.4	4.3597	3.5481	4.6703	6.2949
64.5	4.1358	3.2692	4.6964	6.2351
64.6	4.1904	2.9881	4.7086	6.231
64.7	4.1057	3.4136	4.719	6.1712
64.8	4.0215	3.5329	4.7404	6.0643
64.9	4.1946	3.7991	4.6598	5.7648
65	4.1009	3.5107	4.5429	5.8036
65.1	4.3439	3.6239	4.509	5.8833
65.2	4.2903	3.5649	4.6229	5.8982
65.3	4.2364	3.7384	4.7425	5.92
65.4	4.1933	3.7407	4.6296	5.8668
65.5	4.2753	3.6535	4.7158	5.8276
65.6	4.2221	3.6782	4.7906	5.9507
65.7	4.1101	3.4412	4.6217	6.1023
65.8	4.212	3.5439	4.8376	6.1566
65.9	4.2629	3.4449	4.9829	6.0427
66	4.3431	3.6875	5.005	5.8229
66.1	4.3356	3.7516	5.0534	6.0983
66.2	4.1822	3.8001	4.9589	5.8551
66.3	4.1203	3.7157	4.9091	5.8619
66.4	4.2749	3.3598	5.0219	5.8301
66.5	4.2345	3.6741	5.0115	6.2029
66.6	4.23	3.8194	5.1669	6.0886
66.7	4.1976	3.762	5.1252	6.0092
66.8	4.3146	3.7562	5.2775	5.9544
66.9	4.3034	3.6176	5.1948	6.0982
67	4.3828	3.7294	5.1928	6.0431
67.1	4.3767	3.9111	5.3368	6.174
67.2	4.4592	3.9186	5.2507	6.3931
67.3	4.4711	3.8425	5.177	6.1894
67.4	4.3611	3.8897	5.0637	6.0064
67.5	4.4921	4.0065	5.1166	5.9862
67.6	4.2753	3.7766	5.003	5.9687
67.7	4.2531	3.8213	5.0902	6.0689
67.8	4.2543	4.02	5.1262	6.1405
67.9	4.1109	3.8672	4.9488	5.9569
68	4.0422	3.8944	5.0592	6.0766
68.1	4.2518	3.9502	5.0648	6.0664
68.2	4.3142	3.9934	4.9076	5.7955
68.3	4.0763	3.7687	4.9476	6.0599
68.4	4.0678	3.8228	5.0664	5.9234
68.5	4.2697	4.0232	4.9316	6.0098
68.6	4.2432	3.8826	4.8992	5.9165
68.7	4.3611	4.0128	4.8982	5.9812
68.8	4.1098	3.9812	4.9706	6.0341
68.9	4.3451	4.0225	4.9566	6.095
69	4.2025	4.1103	4.8244	5.9878
69.1	4.177	4.195	4.8368	6.4008
69.2	4.2338	4.291	4.8605	6.269
69.3	4.1946	4.2996	4.8317	6.1013
69.4	4.2932	3.9557	4.9295	6.2205
69.5	4.3365	4.1003	4.9146	6.2855
69.6	4.1958	4.1225	4.9302	6.2722
69.7	4.4038	4.4424	4.7721	6.3241
69.8	4.3054	4.7092	4.6871	6.333
69.9	4.1189	4.5986	4.7253	6.2316
70	4.1244	4.6734	4.8627	6.1058
70.1	4.1037	4.575	4.8787	6.2166
70.2	4.1538	4.479	4.997	6.0797
70.3	4.2727	4.5499	4.8018	6.1506
70.4	4.228	4.2568	5.0411	5.9998
70.5	4.3	4.6096	4.9922	5.9896
70.6	4.4049	4.4193	4.8757	6.0478
70.7	4.4958	4.7472	4.7741	5.9542
70.8	4.4087	4.7376	4.9391	5.9539
70.9	4.5215	4.8091	5.0717	5.8802
71	4.5624	4.6534	4.9049	6.054
71.1	4.4477	4.487	4.9148	6.1562
71.2	4.376	4.2483	4.8364	6.1486
71.3	4.5023	4.3541	4.7588	6.1669
71.4	4.6132	4.4236	4.9352	5.9819
71.5	4.6906	4.5346	4.6895	5.7202
71.6	4.5818	4.5581	4.8476	5.9427
71.7	4.564	4.3399	5.0091	5.8618
71.8	4.5618	4.3708	5.0518	5.9947
71.9	4.6431	4.6022	5.0237	5.8745
72	4.6529	4.446	4.9649	5.6362
72.1	4.6817	4.5426	4.9166	5.6787
72.2	4.7857	4.6188	5.0229	6.0722
72.3	4.5359	4.7941	4.9492	6.2116
72.4	4.5119	4.5927	4.8799	6.3229
72.5	4.5808	4.2911	4.835	6.2684
72.6	4.4885	4.2356	4.8202	6.2887
72.7	4.5337	4.4659	4.6292	6.2512
72.8	4.5276	4.371	4.6169	6.381
72.9	4.5144	4.1899	4.5404	6.3672
73	4.5995	3.9564	4.5786	6.2694
73.1	4.4473	3.8658	4.6616	6.3279
73.2	4.5049	3.795	4.5482	6.2613
73.3	4.3924	3.8157	4.7208	6.2899
73.4	4.3231	3.8484	4.589	6.2363
73.5	4.3762	3.9177	4.6184	6.0359
73.6	4.4918	3.9328	4.6836	6.3245
73.7	4.4745	4.0321	4.4625	6.2986
73.8	4.5607	3.9109	4.5341	6.4337
73.9	4.5535	3.8428	4.4687	6.1913
74	4.4514	3.6848	4.4779	6.1019
74.1	4.5236	3.6905	4.4501	5.9721
74.2	4.4562	3.8914	4.4482	6.255
74.3	4.4291	3.6769	4.374	6.2604
74.4	4.5414	3.6353	4.4306	6.4064
74.5	4.4754	3.5745	4.5636	6.5164
74.6	4.7553	3.7242	4.4124	6.5836
74.7	4.5813	3.5872	4.649	6.4247
74.8	4.5089	3.9397	4.4241	6.2204
74.9	4.4572	4.2073	4.6048	6.1947
75	4.3477	3.7695	4.572	6.1963
75.1	4.5005	3.7007	4.6273	6.3503
75.2	4.2994	3.873	4.672	6.2296
75.3	4.3599	3.7579	4.7315	6.1118
75.4	4.2311	3.7252	4.7311	6.2025
75.5	4.2546	3.9658	4.7029	6.2077
75.6	4.3097	3.8253	4.5449	6.4399
75.7	4.0655	3.8141	4.6678	6.1687
75.8	4.2677	3.9158	4.7624	6.2543
75.9	4.3377	3.9525	4.5619	6.4219
76	4.4136	4.0578	4.6117	6.4205
76.1	4.2969	3.9751	4.5827	6.4099
76.2	4.2567	3.8066	4.6244	6.5577
76.3	4.2091	4.1551	4.6386	6.4542
76.4	4.3949	4.001	4.4771	6.4151
76.5	4.2197	4.0079	4.4259	6.1113
76.6	4.5039	3.977	4.3825	6.2058
76.7	4.4633	3.7673	4.4446	6.1255
76.8	4.3679	4.2319	4.5225	6.0521
76.9	4.4875	4.053	4.6019	6.0939
77	4.3432	4.0353	4.5339	6.2006
77.1	4.2209	3.701	4.5015	6.0227
77.2	4.3573	3.7123	4.5383	5.9164
77.3	4.4614	4.0853	4.5359	5.9451
77.4	4.3754	4.2705	4.6088	5.9817
77.5	4.4174	4.3805	4.6118	6.3485
77.6	4.4185	4.216	4.7285	6.1437
77.7	4.4742	4.2289	4.5168	6.2756
77.8	4.4405	4.2975	4.4411	6.3107
77.9	4.4973	4.1865	4.4523	6.2515
78	4.421	4.149	4.4542	6.0519
78.1	4.4376	3.9215	4.5721	6.0555
78.2	4.4889	4.0637	4.4703	6.3111
78.3	4.4824	4.0951	4.4173	6.21
78.4	4.6895	3.9709	4.4032	6.175
78.5	4.5027	4.0877	4.3493	6.5227
78.6	4.4566	3.6532	4.3791	6.5496
78.7	4.4621	3.8263	4.3484	6.1626
78.8	4.5575	3.5315	4.5978	6.3843
78.9	4.5454	3.3942	4.6247	5.985
79	4.4889	3.7092	4.535	6.172
79.1	4.5404	3.7816	4.6332	6.0306
79.2	4.5181	3.9154	4.6381	5.9307
79.3	4.527	3.874	4.5078	6.0711
79.4	4.5413	3.7813	4.565	6.1195
79.5	4.5494	3.8081	4.6497	6.1973
79.6	4.3367	3.7242	4.6411	6.326
79.7	4.2983	3.73	4.5533	5.8151
79.8	4.3534	3.6059	4.373	6.2092
79.9	4.3535	3.8393	4.536	6.1489
80	4.4481	3.6109	4.6628	6.1479
80.1	4.4327	3.8198	4.4021	6.2491
80.2	4.4587	3.6782	4.5337	6.5023
80.3	4.2237	3.9438	4.5802	6.1481
80.4	4.3228	3.8999	4.4744	6.2379
80.5	4.3001	4.1063	4.4664	6.1621
80.6	4.2859	4.1502	4.4369	6.2484
80.7	4.2192	4.0424	4.4426	6.4704
80.8	4.1822	3.813	4.1932	6.2945
80.9	4.2466	3.983	4.3442	6.1278
81	4.1548	4.153	4.4473	6.0509
81.1	4.1886	3.9999	4.4098	6.2977
81.2	4.3427	4.029	4.5974	6.356
81.3	4.4247	4.1396	4.4641	6.2006
81.4	4.3392	4.1861	4.604	6.2997
81.5	4.4143	4.1544	4.3401	6.3305
81.6	4.2583	4.1257	4.3293	6.278
81.7	4.2599	4.162	4.312	6.2454
81.8	4.1611	4.2739	4.3738	5.9736
81.9	4.2445	4.3774	4.4018	5.9374
82	4.1462	4.4325	4.3302	6.023
82.1	3.9687	4.4882	4.3414	6.0302
82.2	4.1222	4.6062	4.4542	5.7637
82.3	3.9857	4.2981	4.3747	6.3464
82.4	4.033	4.3014	4.442	6.0716
82.5	4.1928	4.2628	4.3776	6.2585
82.6	4.1605	4.0381	4.3727	6.1221
82.7	4.1411	4.0779	4.4221	6.0617
82.8	4.2559	4.0153	4.3392	6.1029
82.9	4.183	4.2376	4.3553	6.1289
83	4.2042	4.383	4.2639	6.1681
83.1	4.1673	4.4656	4.3381	6.1703
83.2	4.1451	4.1222	4.5987	6.1274
83.3	4.2156	4.3205	4.4346	6.4355
83.4	4.2066	4.4548	4.433	6.3294
83.5	4.097	4.2646	4.4145	6.0228
83.6	4.3079	4.3724	4.5637	6.0591
83.7	4.1932	4.3706	4.5485	6.2264
83.8	4.182	4.2421	4.5068	5.8849
83.9	4.0553	4.4057	4.4482	5.9109
84	4.2695	4.06	4.3884	5.9057
84.1	4.1564	4.0314	4.5392	6.041
84.2	4.1691	4.3702	4.6189	6.1004
84.3	4.2233	4.2573	4.6219	5.9939
84.4	4.0817	4.2364	4.6105	5.8863
84.5	4.0357	4.0978	4.651	6.0341
84.6	4.2058	4.2501	4.6006	6.0984
84.7	4.2583	4.3655	4.5276	6.2114
84.8	4.3703	4.0771	4.5967	6.307
84.9	4.3274	4.0913	4.6611	6.7903
85	4.3217	4.1399	4.5932	6.5703
85.1	4.1611	4.4172	4.5671	6.6919
85.2	4.3496	4.372	4.5647	6.5629
85.3	4.2479	4.16	4.5286	6.5396
85.4	4.3616	4.2711	4.6591	6.5966
85.5	4.2402	4.2175	4.7004	6.6278
85.6	4.1989	4.2239	4.6336	6.6357
85.7	4.3465	4.1045	4.5457	6.5964
85.8	4.3202	4.0047	4.6951	6.1764
85.9	4.2989	3.9792	4.8352	6.1211
86	4.4501	4.0256	4.7413	6.301
86.1	4.3753	4.1931	4.6834	6.1635
86.2	4.3728	3.8536	4.7537	6.428
86.3	4.3553	3.8476	4.5858	6.3301
86.4	4.2316	3.8678	4.5254	6.6401
86.5	4.2453	4.2039	4.382	6.425
86.6	4.4032	4.1057	4.5418	6.6055
86.7	4.3579	4.1132	4.4513	6.6679
86.8	4.2727	3.8924	4.424	6.4853
86.9	4.3455	3.9673	4.3003	6.549
87	4.3982	3.9779	4.4376	6.7302
87.1	4.473	4.0251	4.6217	6.6534
87.2	4.4349	4.3157	4.398	6.559
87.3	4.4269	4.3083	4.4688	6.4744
87.4	4.4724	4.4603	4.5143	6.6262
87.5	4.2886	4.2027	4.3342	6.4969
87.6	4.2638	4.1927	4.2734	6.6254
87.7	4.304	4.3759	4.4022	6.6029
87.8	4.3032	4.2387	4.388	6.7428
87.9	4.2679	4.0645	4.3443	6.5178
88	4.3897	4.0292	4.5895	6.7443
88.1	4.222	4.0883	4.3177	6.5939
88.2	4.2555	4.2653	4.365	6.563
88.3	4.3837	4.0691	4.4095	6.7373
88.4	4.4606	3.9441	4.4017	6.6787
88.5	4.4303	3.9963	4.6435	6.7245
88.6	4.3061	4.0183	4.6759	6.7594
88.7	4.2257	3.9664	4.4414	6.6371
88.8	4.2484	4.1677	4.3979	6.6132
88.9	4.2648	3.9361	4.2566	6.5886
89	4.3392	4.0613	4.3179	6.5321
89.1	4.2977	3.9718	4.4158	6.5893
89.2	4.3299	3.9416	4.0557	6.6819
89.3	4.3926	4.1835	4.2665	6.4969
89.4	4.3845	4.1775	4.0923	6.6035
89.5	4.3803	4.0955	4.1522	6.6038
89.6	4.4185	4.4226	4.0896	6.8416
89.7	4.5708	4.3358	4.3283	6.7132
89.8	4.4074	4.1662	4.216	6.751
89.9	4.4181	4.1516	4.1558	6.6014
90	4.526	3.9009	4.2548	6.6588
90.1	4.5724	4.285	4.3015	6.6335
90.2	4.5348	4.3799	4.5329	6.6857
90.3	4.2483	4.6895	4.2592	6.5155
90.4	4.3562	4.501	4.4011	6.4568
90.5	4.3959	4.8076	4.283	6.6967
90.6	4.301	4.7455	4.2454	6.6091
90.7	4.2913	4.537	4.1647	6.516
90.8	4.1959	4.8697	4.2826	6.7507
90.9	4.2296	4.9485	4.3344	6.747
91	4.1611	4.7941	4.2166	6.63
91.1	4.1713	4.833	4.2442	6.7288
91.2	4.0428	4.852	4.2847	6.7653
91.3	4.2502	4.533	4.3028	6.7014
91.4	4.2815	4.7101	4.2191	6.6523
91.5	4.3089	4.7945	4.3538	6.6282
91.6	4.281	4.4933	4.522	6.6312
91.7	4.228	4.375	4.4423	6.6522
91.8	4.2448	4.2091	4.3957	6.6077
91.9	4.1692	4.1544	4.5134	6.6242
92	4.184	4.1589	4.3501	6.8006
92.1	4.2462	3.994	4.4136	6.6817
92.2	4.2427	3.9211	4.4447	6.7857
92.3	4.2741	4.0445	4.5611	6.6859
92.4	4.151	3.9979	4.4146	6.5987
92.5	4.2726	4.1258	4.2173	6.6988
92.6	4.2847	3.9258	4.3153	6.7049
92.7	4.3349	3.9067	4.4735	6.4837
92.8	4.3277	3.9171	4.4515	6.679
92.9	4.2735	3.8817	4.3465	6.64
93	4.4634	3.8799	4.5772	6.5269
93.1	4.2699	4.0502	4.6496	6.5276
93.2	4.3263	3.8713	4.7644	6.5363
93.3	4.3661	3.9957	4.6969	6.5501
93.4	4.4065	3.9916	4.5591	6.5846
93.5	4.4031	4.1472	4.5825	6.693
93.6	4.3567	4.1418	4.4244	6.7516
93.7	4.3059	4.16	4.5323	6.6498
93.8	4.2414	4.0133	4.4015	6.6185
93.9	4.2053	4.097	4.5284	6.7231
94	4.2785	4.0172	4.7241	6.7459
94.1	4.3233	4.1866	4.8419	6.7418
94.2	4.3025	4.2864	4.8754	6.6995
94.3	4.2959	4.0582	4.7919	6.6629
94.4	4.2928	4.2358	4.7313	6.6976
94.5	4.261	4.329	4.6686	6.8225
94.6	4.194	4.3809	4.8172	6.81
94.7	4.2737	4.1815	4.7477	6.8942
94.8	4.2464	4.2662	4.8074	6.9063
94.9	4.3407	4.2318	4.7887	6.7214
95	4.251	4.2804	4.9571	6.9011
95.1	4.2549	4.0399	4.8106	6.847
95.2	4.1935	3.9123	4.7679	6.7741
95.3	4.2312	4.1081	4.7189	7.0272
95.4	4.3467	4.0643	4.6949	6.8795
95.5	4.1378	3.9943	4.6385	7.1416
95.6	4.3296	4.0561	4.4395	7.1495
95.7	4.4242	3.8594	4.3074	7.0159
95.8	4.39	3.8885	4.4837	6.9576
95.9	4.3971	3.9627	4.5719	6.8673
96	4.3656	3.8658	4.5103	7.0505
96.1	4.3997	3.7704	4.5682	6.9281
96.2	4.295	3.9549	4.4947	7.0433
96.3	4.3272	3.8175	4.4214	6.8844
96.4	4.3463	3.7893	4.3838	6.9572
96.5	4.3759	3.8165	4.3587	7.1087
96.6	4.2767	3.9905	4.5168	6.9441
96.7	4.3687	4.0366	4.4124	7.084
96.8	4.2775	4.0029	4.1901	7.0919
96.9	4.3438	3.8456	4.2133	6.9913
97	4.2941	3.8755	4.2446	7.0209
97.1	4.2935	3.7746	4.2803	6.932
97.2	4.19	3.7514	4.2796	6.8753
97.3	4.1412	3.8168	4.4182	7.0377
97.4	4.2903	3.6242	4.4832	6.9182
97.5	4.2238	3.5164	4.4024	6.9216
97.6	4.2317	3.6552	4.4598	6.8083
97.7	4.2244	3.5036	4.3158	7.0841
97.8	4.1575	3.9115	4.3477	6.9359
97.9	4.3512	4.0374	4.3995	6.8679
98	4.3101	3.842	4.4068	6.9749
98.1	4.3676	4.1409	4.2977	6.8107
98.2	4.2311	3.9735	4.4524	6.7785
98.3	4.2949	3.9823	4.2469	6.7672
98.4	4.4012	4.0109	4.4819	6.8143
98.5	4.5791	3.8943	4.5225	6.6685
98.6	4.4607	3.801	4.5838	6.7862
98.7	4.362	3.8247	4.4797	6.746
98.8	4.2707	3.8623	4.4326	6.5793
98.9	4.3319	4.1419	4.5181	6.6158
99	4.3531	4.3341	4.5689	6.6697
99.1	4.2219	4.5121	4.4366	6.6412
99.2	4.3966	4.5668	4.2613	6.8621
99.3	4.326	4.4063	4.3797	6.5966
99.4	4.2477	4.3451	4.6358	6.6577
99.5	4.2377	4.1621	4.7004	6.8295
99.6	4.2475	4.1754	4.7846	6.8016
99.7	4.2776	4.1093	4.7971	6.7814
99.8	4.2378	4.2507	4.7314	6.7042
99.9	4.3141	4.4773	4.8144	6.7688
100	4.1484	4.3197	4.9277	6.716
